RESEARCH ARTICLE

# Comparative characterization of bacterial communities in geese fed all-grass or high-grain diets

Qi Xu<sup>1</sup>, Xiaoya Yuan<sup>1</sup>, Tiantian Gu<sup>1</sup>, Yang Li<sup>1</sup>, Wangcheng Dai<sup>2</sup>, Xiaokun Shen<sup>2</sup>, Yadong Song<sup>1</sup>, Yang Zhang<sup>1</sup>, Wenming Zhao<sup>1</sup>, Guobin Chang<sup>1</sup>, Guohong Chen<sup>1\*</sup>

**1** Key Laboratory of Animal Genetics and Breeding and Molecular Design of Jiangsu Province, Yangzhou University, Yangzhou, PR, China, **2** Waterfowl Institute of Zhenjiang City, Dantu, China

\* [ghchen@yzu.edu.cn](mailto:ghchen@yzu.edu.cn)

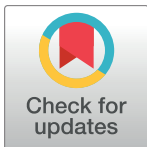

**OPEN ACCESS**

**Citation:** Xu Q, Yuan X, Gu T, Li Y, Dai W, Shen X, et al. (2017) Comparative characterization of bacterial communities in geese fed all-grass or high-grain diets. PLoS ONE 12(10): e0185590. <https://doi.org/10.1371/journal.pone.0185590>

**Editor:** Marie-Joelle Virolle, Universite Paris-Sud, FRANCE

**Received:** May 5, 2017

**Accepted:** September 17, 2017

**Published:** October 3, 2017

**Copyright:** © 2017 Xu et al. This is an open access article distributed under the terms of the [Creative Commons Attribution License](https://creativecommons.org/licenses/by/4.0/), which permits unrestricted use, distribution, and reproduction in any medium, provided the original author and source are credited.

**Data Availability Statement:** The sequence data file was submitted to the Short read archive at NCBI (accession no. SRR3711176).

**Funding:** This work received financial support from the ear-marked fund for Modern Agro-industry Technology Research System (CARS-42-3), the National Key Technology R&D Program of China (2015BAD03B00), and the Priority Academic Program Development of Jiangsu Higher Educational Institutions (2011-137).

**Competing interests:** The authors have declared that no competing interests exist.

## Abstract

### Background

Gut microbial composition is dependent on diet. Geese are herbivores and can digest crude fibre, but the relationship between composition of the microbiota and a fibre-rich diet in geese is not well understood.

### Results

Here, caecal and faecal samples were collected simultaneously from all-grass-fed geese and high-grain-fed geese and the hypervariable V3–V4 regions of the bacterial 16S rRNA gene were sequenced. The results was identified that high-grass-fed geese possessed significantly higher alpha diversity both in caecum and faeces compared with that in all-grain-fed geese. In addition, the composition of dominant bacterium occurred remarkable shifting due to different diet patterns, Firmicutes were more abundant in all-grass-fed geese, whereas Bacteroidetes were abundant in high-grain-fed geese. Fusobacteria and Deferri-bacteres were obviously present in high-grain-fed geese and few in all-grass-fed geese. Most importantly, some specific microorganisms such as Ruminococcaceae, Lachnospiraceae and Bacteroidaceae which may associated with cellulose-degrading that were characterized to show distinctly diverse between the two diet patterns. PICRUST analysis revealed the metabolic pathways such as carbohydrate and amino acid metabolism were overrepresented in all-grass-fed geese.

### Conclusions

In conclusion, Firmicutes and Bacteroidetes were identified abundantly when the geese was fed with all-grass feed and high-grain feed, respectively. And Ruminococcaceae, Lachnospiraceae and Bacteroidaceae were recognized as main cellulose-degrading bacteria in the geese. The functional profiles of gut microbiota revealed the dominant microbiota communities were involved mainly in the carbohydrate metabolism in all-grass-fed geese.

## Introduction

The gut microbiota is the community of microorganisms that colonize the gut of a host organism. Microorganisms colonize the gut via a very complex process of interactions between the microorganisms and the host. The host provides a place for the survival and evolution of microorganisms, and in return, the microbiota benefits the host by providing essential nutrients, as well as stimulating growth performance [1, 2]. The mammalian gut microbiota has been widely surveyed, and its diversity, structure, and function have been found to be mainly shaped by adaptation to diet [3–5]. Highly diverse cellulolytic obligate anaerobes, such as lineages within Bacteroidales, Fibrobacterales, and Spirochaetales colonize the gastrointestinal tracts of most herbivores, providing microbial fermentation to enhance nutrient absorption [6, 7]. Previous research has shown that, the improvements in cellulose degradation would have a favourable impact on animal productivity in herbivores. *Ruminococcus* and *Fibrobacter* are important members of the rumen microbial community that enable the host to degrade and utilize fibrous plant materials efficiently as nutrients [8–10].

The goose (*Anas cygnoides*) is a commercially important food source that is widely cultivated in China [11]. Under intensive systems, geese are fed diets consisting of large proportions of grains to support rapid weight gain. Although these feeding practices may be helpful in enhancing cost-efficiency in the short term, it is unclear whether such intensive systems affect intestinal microbial structure or gastrointestinal health. After all, geese are basically herbivores under natural conditions.

It is well known that the goose has a strong ability to digest crude fibre [12–14]. However, the goose is genetically deficient in cellulose-digesting enzymes, and digests fibre mainly by microorganism fermentation in the caecum [15–17]. Therefore, it is important to study the diverse bacterial community to reveal the molecular mechanisms underlying this strong ability of the goose to digest crude fibre. Liu [15] analysed the goose caecal bacterial community by denaturing gradient gel electrophoresis (DGGE), and observed an increased diversity in caecal microbiota with an increase in dietary crude fibre levels. They further found that uncultured *Clostridiaceae* sp., uncultured *Treponema* sp., *Cellulomonas* sp., uncultured *Bacteroides* sp., and uncultured *Eubacteriaceae* bacterium were the major cellulose-degrading bacteria [15]. However, the DGGE approach only isolates small DNA fragments, and this might have resulted in the loss of some useful sequence information. Furthermore, this approach usually displays DNA fragments from dominant communities due to its low resolution. Recently, with the development of next-generation sequencing technologies, 16S rRNA gene amplicon deep sequencing has been applied widely to investigate the microbiota [1, 18, 19].

In the present study, we investigated the effects of different diets (all-grass diet and high-grain diet) on the microbiota of geese, using paired-end MiSeq sequencing to characterize the bacterial community of the caecum and faeces. These data may identify bacterial taxa that are associated with the digestion of crude fibre.

## Materials and methods

### Ethics statement

The animal experiment was reviewed and approved by the Institutional Animal Care and Use Committee of Yangzhou University (approval number:151–2014). Procedures were performed in accordance with the Regulations for the Administration of Affairs Concerning Experimental Animals (Yangzhou University, China, 2012) and the Standards for the Administration of Experimental Practices (Jiangsu, China, 2008).

## Animals and sample collection

A total of forty 35-day-old Yangzhou goslings weighing an average of 1404.05 g were selected from the breeding farm of the Yangzhou Goose Co. Ltd (Yangzhou, China). The goslings were randomly assigned to two groups. One group was fed by rotation grazing on a pasture of perennial ryegrass and Chinese trumpet creeper (220 g crude fibre/kg DM), and the other group was fed a high-grain diet consisting mainly of maize and soybean meal (100 g crude fibre/kg DM, produced by Changzhou Chia Tai Co., Ltd). During the experiment, geese were fed *ad libitum* with the grass diet or the high-grain diet. The experimental period lasted 5 weeks, the body weight was shown in S6 Table, the body weight of 70-day-old geese on the high-grain diet was higher than that of geese on the grass diet ( $P < 0.05$ ). The female geese from two groups were placed individually in a cage and their defecation observed from a distance. Once the faeces were excreted from the goose, the faeces were selected immediately from the central portion of each cage to minimize contamination. After collection, samples were stored on ice until frozen at  $-80^{\circ}\text{C}$ .

Following this, the same geese were slaughtered immediately by anesthetizing them with sodium pentobarbital for intestinal sampling. The abdominal cavity was opened by a midline incision, and the intestinal tract was removed carefully. A segment of the caecum was tied at both ends and the contents collected on ice, and then stored at  $-80^{\circ}\text{C}$  until DNA extraction.

## DNA extraction and PCR amplification of 16S rRNA gene

Microbial genomic DNA was extracted from each samples using the E.Z.N.A.<sup>®</sup> DNA Kit (Omega Bio-tek, Norcross, GA, U.S.) according to the manufacturer's protocols. DNA extraction was carried out using the bead-beating method, with a mini-bead beater. The frozen samples were placed into bead tubes, and then added 1ml Buffer of SLX Mlus to the samples, incubated at  $70^{\circ}\text{C}$  for 10min. The samples were beaten for 90 s at 5000 rpm (maximum speed) in a Mini-Beadbeater<sup>™</sup> (Biospec Products Inc., Bartlesville, OK). The solution was precipitated with ethanol, and the pellets were suspended in 50  $\mu\text{L}$  Tris-EDTA buffer. The DNA concentration was determined using a NanoDrop spectrophotometer (NanoDrop, USA).

The V3–V4 regions of the bacterial 16S rRNA gene were amplified using PCR (95R (95  $\mu\text{L}$  ethanol, and the pellets were suspended 30 s,  $55^{\circ}\text{C}$  for 30 s,  $72^{\circ}\text{C}$  for 45 s, and a final extension at  $72^{\circ}\text{C}$  for 10 min) using the primers [20] 338F 5'–ACTCCTACGGGAGGCAGCA–3' and 806R 5'–GGACTACHVGGGTWCTAAT–3'. The barcode is an eight-base sequence unique to each sample. PCR reactions were performed in triplicate in a 20- $\mu\text{L}$  mixture containing 4  $\mu\text{L}$  of 5 $\times$  Fast Pfu buffer, 2  $\mu\text{L}$  of 2.5 mM dNTPs, 0.4  $\mu\text{L}$  of each primer (5 $\mu\text{M}$ ), 0.4  $\mu\text{L}$  of Fast Pfu polymerase, and 10 ng of template DNA.

## Illumina MiSeq sequencing

The amplicons were examined on a 2% (w/v) agarose gel. The band was extracted and purified with the AxyPrepDNA Gel (Axygen, USA) according to the manufacturer's instructions, and quantified using QuantiFluor<sup>™</sup> uantiFluorrding to the manufaamplicons were pooled in equimolar amounts and paired-end sequenced (2uenced (2end sIllumina MiSeq platform (Majorbio, China) according to the standard protocols.

## Processing and bioinformatics analysing of sequencing data

Raw FASTQ files were de-multiplexed and quality-filtered using QIIME (version 1.17) with the following criteria [21] (i) The 300-bp reads were truncated at any site that obtained an average quality score of  $< 20$  over a 50-bp sliding window, and truncated reads shorter than 50 bp were discarded. (ii) Only overlapping sequences longer than 10 bp were assembled according to their

overlapped sequence. Reads that could not be merged were discarded. (iii) Reads with exact barcode matching, no more than two-nucleotide mismatch in primer matching were left, while reads containing ambiguous characters were removed. OTUs at or above the 97% similarity cut-off were clustered using UPARSE software (version 7.1, <http://drive5.com/uparse>) [22]. Taxonomic classification of OTUs was carried out using the Ribosomal Database Project (RDP) Classifier [23]. Rarefaction analysis based on MOTHUR (version 1.30.1) was conducted to reveal alpha diversity indices, including the Chao, ACE, and Shannon diversity indices [24]. Beta diversity analysis was performed using UniFrac to compare the results from principal component analysis (PCA) [25]. Linear discriminant analysis (LDA) coupled with effect size (LEfSe) was performed to identify bacterial taxa that were differentially represented between groups at the genus level or higher taxonomic levels [26], and only taxa meeting an LDA significance threshold  $\geq 2$  and the parameter of LEfSe for p valuevalue owere adopted. The functional profiles of microbial communities were predicted using PICRUSt [27]. The R packages 'heatmap' and 'vegan' were used for redundancy analysis (RDA) and plotting (including generation of the PCA and heatmap figures) [28]. To compare bacterial communities of different geese, We downloaded and analysed the data of goose microbiota from NCBI (ERR011376). The sequences satisfied the inclusion criteria of sequence length > 500 bp, and data sets containing > 50 sequences.

## Statistical analysis

Species richness and alpha diversity were analysed by two-way analysis of variance (ANOVA). Each individual OTU was analysed for effects of diet by ANOVA. The ANOVA analysis was performed using SPSS 17.0 software.  $P < 0.05$  was considered statistically significant. Differentially abundant OTUs were analysed using Metastats software [29].

## Results

### General DNA sequencing observations

To characterize the bacterial lineages present in the faecal and caecal microbiota of all-grass-fed geese and high-grain-fed geese, we performed Illumina sequencing of the V3gquehyper-variable regions of 16S rRNA gene with the PE300 platform. We generated a dataset consisting of 495,646 filtered, high-quality, classifiable 16S rRNA gene sequences with a mean average (eanith  $30,977 \pm 5,218$  sequences per sample (**S1 and S2 Tables**)). The sequence data file was submitted to the Short read archive at NCBI (Accession NO. SRR3711176). The quality-filtered sequences were clustered OTUs at the 97% similarity cut-off. The singletons were removed, and the OTUs including three sequences were retained. A total of 391,736 reads were assigned to 933 non-singleton OTUs at the 97% similarity cut-off, which were assigned into 149 taxa (genus level). The rarefaction curves tended to approach the saturation plateau (**Fig 1**). Good's coverage estimates indicated that a large part of the diversity in all samples had been captured, with the average coverage being 97.06%(S.D.1.47%).

### Microbial richness and biodiversity

We then compared the microbial  $\alpha$ -diversity in faecal and caecal samples between the all-grass-fed and high-grain-fed groups, including microbial richness estimated by the ACE and Chao1 indices, and diversity assessed by the Shannon and Simpson indices (**Table 1**). At the 0.03 dissimilarity level, we found significant differences in richness between different diet-fed geese in both faecal and caecal samples ( $P < 0.01$  or  $P < 0.05$ ), with higher microbial richness in all-grass-fed geese. The caecum exhibited significantly high microbial diversity from the indices of Shannon and Simpson when compared with the faeces ( $P < 0.05$ ).

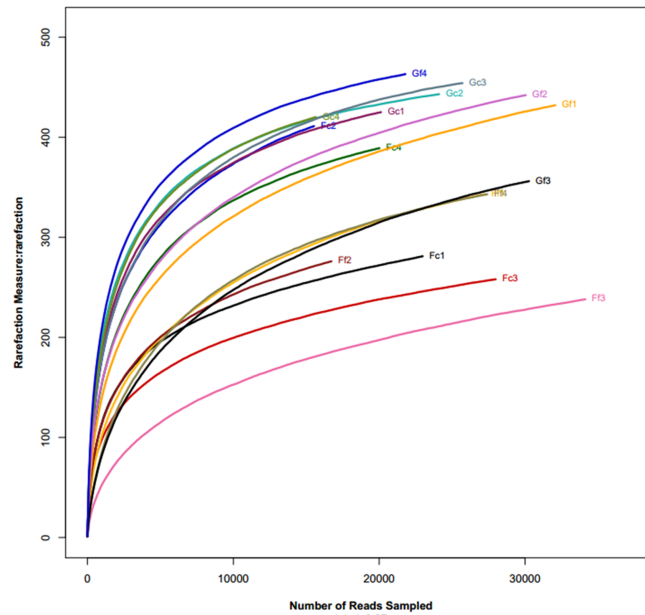

**Fig 1. Rarefaction analysis of the different samples.** Rarefaction curves of OTUs clustered at 97% sequence identity across different samples. From the all-grass-fed (G) and high-grain-fed (F) groups, both faecal (f) and caecal (c) samples were used from four individuals (1–4).

<https://doi.org/10.1371/journal.pone.0185590.g001>

To compare community compositions across the different samples, The unweighted UniFrac metric was calculated to assess  $\beta$ -diversity by MOTHUR software. The results indicated that unweighted UniFrac was able to distinctly identify caecum microbiota from geese fed the two different diets (Fig 2(A)), and showed little differentiation in faecal samples (Fig 2(B)). Principal coordinate analysis revealed that principal component analysis (PCA) axis 1 accounted for 55.91% of the variation and PCA axis 2 for 14.11% of the variation in the caecum.

### Differences in caecal bacterial communities between all-grass-fed geese and high-grain-fed geese

On comparing the caecal microbiota in geese receiving different diets, more than 80% of the sequences in all-grass-fed geese and high-grain-fed geese were found to belong to the two

**Table 1. Effects of diet and sample type on the diversity of the bacterial community at the 3% dissimilarity level.**

| Diet               | Sample type | ACE                        | Chao1                     | Shannon                 | Simpson                  |
|--------------------|-------------|----------------------------|---------------------------|-------------------------|--------------------------|
| All-grass diet     | Faeces      | 497.0±34.4 <sup>Aa</sup>   | 493.8±40.3 <sup>Aa</sup>  | 3.7±1.1 <sup>ABac</sup> | 0.10±0.10 <sup>Aab</sup> |
|                    | Caecum      | 476.3±12.74 <sup>ABa</sup> | 481.3±13.0 <sup>Aa</sup>  | 4.5±0.1 <sup>Aa</sup>   | 0.03±0.01 <sup>Ab</sup>  |
| High-grain diet    | Faeces      | 372.3±45.3 <sup>Bb</sup>   | 373.8±38.6 <sup>Bb</sup>  | 2.5±1.0 <sup>Bbc</sup>  | 0.27±0.22 <sup>Aa</sup>  |
|                    | Caecum      | 398.8±75.6 <sup>ABb</sup>  | 399.8±74.1 <sup>ABb</sup> | 3.9±0.4 <sup>ABa</sup>  | 0.05±0.02 <sup>Ab</sup>  |
| <i>P</i>           |             |                            |                           |                         |                          |
| Diet               |             | <0.01                      | <0.01                     | <0.05                   | 0.168                    |
| Sample type        |             | 0.906                      | 0.778                     | <0.05                   | <0.05                    |
| Diet * Sample type |             | 0.342                      | 0.427                     | 0.475                   | 0.283                    |

Different capital letters indicate very significant differences between respective means ( $P<0.01$ ), while different lowercase letters indicate significant differences ( $P<0.05$ ).

<https://doi.org/10.1371/journal.pone.0185590.t001>

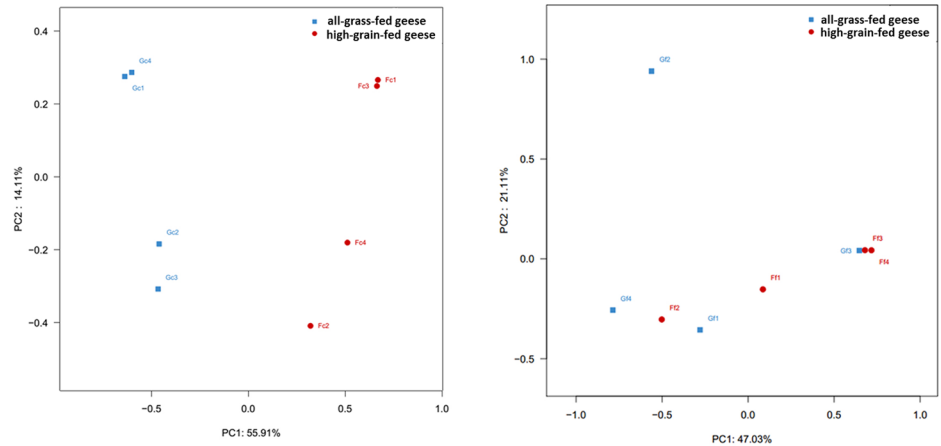

**Fig 2. Principal component analysis (PCA) of bacterial communities in caecal or faecal samples of geese.** Scatterplot of PCA scores depicting the variance of fingerprints derived from different bacterial communities. Principal components (PCs) 1 and 2 accounted for 55.91% and 14.11% of the variance, respectively. (a) Unweighted PCA scores of caecal microbiota; (b) unweighted PCA scores of faecal microbiota.

<https://doi.org/10.1371/journal.pone.0185590.g002>

most populated bacterial phyla, namely Bacteroidetes and Firmicutes (Fig 3). However, the phylum Firmicutes exhibited higher abundance in the caecal samples of all-grass-fed geese (56.44% versus 31.18%,  $P < 0.05$ ), whereas Bacteroidetes were more abundant in high-grain-fed geese than in all-grass-fed geese (51.14% versus 34.69%,  $P > 0.05$ ). In addition, Fusobacteria (6.75%) and Deferribacteres (2.15%) was present in the high-grain-fed geese, while those were almost absent in all-grass-fed geese (Table 2). Interestingly, at the family level, the most highly abundance of the microbiota was Ruminococcaceae (Firmicutes) and Bacteroidaceae (Bacteroidetes) in all-grass-fed geese and high-grain-fed geese, respectively (Fig 4).

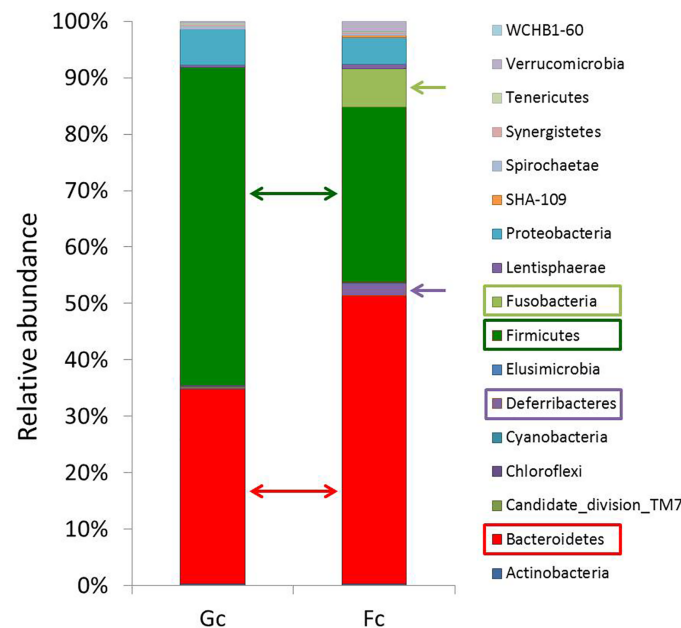

**Fig 3. Distribution of the phyla averaged across dietary treatment in caecal samples from geese.** Data were analysed by RDP classifier v.2.2. Bacterial communities in caecal samples from all-grass-fed geese (Gc) and high-grain-fed geese (Fc). Arrows indicate different phyla.

<https://doi.org/10.1371/journal.pone.0185590.g003>



**Table 2. The different phyla of bacterial communities in caecal samples from all-grass-fed geese and high-grain-fed geese.**

| the phyla of bacterial communities | all-grass-fed geese(%) | high-grain-fed geese(%) | P value |
|------------------------------------|------------------------|-------------------------|---------|
| Actinobacteria                     | 0.240±0.179            | 0.302±0.139             | 0.688   |
| Bacteroidetes                      | 34.687±24.354          | 51.138±7.626            | 0.011   |
| Candidate_division_TM7             | 0.000±0.000            | 0.002±0.003             | 0.024   |
| Chloroflexi                        | 0.001±0.002            | 0.002±0.003             | 0.348   |
| Cyanobacteria                      | 0.195±0.202            | 0.034±0.037             | 0.088   |
| Deferribacteres                    | 0.212±0.280            | 2.154±2.732             | 0.048   |
| Elusimicrobia                      | 0.080±0.074            | 0.031±0.032             | 0.268   |
| Firmicutes                         | 56.438±22.069          | 31.177±2.676            | 0.018   |
| Fusobacteria                       | 0.000±0.000            | 6.752±10.854            | 0.028   |
| Lentisphaerae                      | 0.421±0.747            | 0.742±0.868             | 0.424   |
| Proteobacteria                     | 6.399±4.388            | 4.848±2.746             | 0.198   |
| SHA-109                            | 0.000±0.000            | 0.330±0.660             | 0.024   |
| Spirochaetae                       | 0.535±0.876            | 0.288±0.214             | 0.074   |
| Synergistetes                      | 0.166±0.132            | 0.245±0.489             | 0.077   |
| Tenericutes                        | 0.357±0.274            | 0.166±0.139             | 0.275   |
| Verrucomicrobia                    | 0.268±0.249            | 1.788±2.339             | 0.039   |
| WCHB1-60                           | 0.000±0.000            | 0.002±0.003             | 0.024   |

<https://doi.org/10.1371/journal.pone.0185590.t002>

Although a little difference was seen at the phylum level, 75 OTUs were very significantly different in abundance between geese on different diets ( $P < 0.01$ ) when comparing individual OTUs by ANOVA. Of these, 54 were Firmicutes, 14 Bacteroidetes, 3 Proteobacteria, 3 Actinobacteria and 1 Tenericutes. The abundance of the family Lachnospiraceae from the phylum Firmicutes was significantly higher in all-grass-fed geese than high-grain-fed geese. The relative abundance of 195 OTUs was significant difference between all grass-fed geese and high grain-fed geese (S3 Table).

In addition, a small number of OTUs were identified as making up the dominant community (the abundance accounting for over 1% of the total sequences at family level). It was clear that the 33 OTUs were shared in geese fed with different diets, which belonged mainly Bacteroidaceae and Ruminococcaceae families (S4 Table); and 3 OTUs and 8 OTUs were specific in grass-fed geese and high grain-fed geese, respectively (S4 Table).

To further identify the differences in bacterial taxa between all-grass-fed and high-grain-fed geese, we performed LEfSe as well as non-parametric factorial Kruskal-Wall Prevote sum-rank test to detect differences in abundance 18 and 16 taxa were overrepresented in grass-fed geese

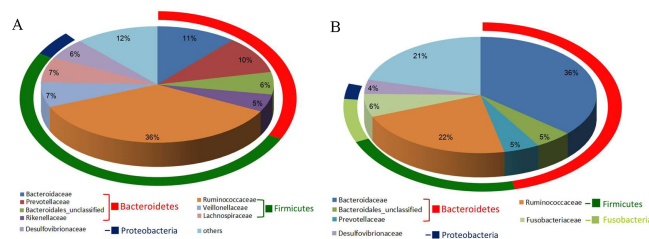

**Fig 4. Pie charts of median percent values of bacterial families present in caecal samples of grass-fed and high-grain-fed geese (>3%).** Rings represent the phylum (Bacteroidetes in green and Firmicutes in red) corresponding to each of the most frequently represented genera. A, caecal samples from grass-fed geese; B, caecal samples from high-grain-fed geese.

<https://doi.org/10.1371/journal.pone.0185590.g004>

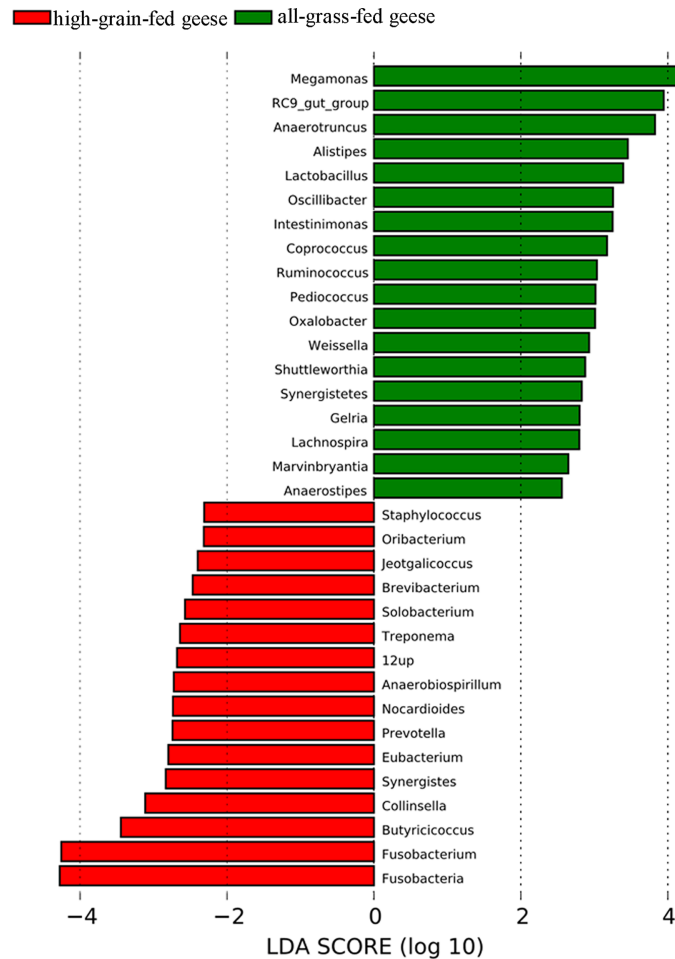

**Fig 5. Chart representing LEfSe statistics in all-grass-fed and high-grain-fed geese.** Bacterial taxa that were significantly different in abundance between all-grass-fed and high-grain-fed geese were identified by LEfSe using default parameters.

<https://doi.org/10.1371/journal.pone.0185590.g005>

(e.g. *Megamonas*, *Anaerotruncus*, *Alistipes*,  $P < 0.05$ ) and high-grain-fed geese (e.g. *Fusobacteria*, *Fusobacterium*, *Butyricoccus*,  $P < 0.05$ ), respectively (Fig 5).

We next used the PICRUST tool to explore the functional profiles of the goose gut microbiota. The total OTUs were normalized by 16S rRNA gene copy number ([http://picrust.github.io/picrust/tutorials/otu\\_picking.html](http://picrust.github.io/picrust/tutorials/otu_picking.html)) and their metagenomic functions predicted from the KEGG pathways. A total of 175 pathways were more abundant in all-grass-fed geese, while 117 pathways were significantly more abundant in high-grain-fed geese ( $P < 0.01$ ; S5 Table). Of these pathways, the greatest difference was observed among metabolic pathways between the two groups (Fig 6). For example, the KEGG Orthologies (KO) of ‘carbohydrate metabolism’, ‘metabolism of cofactors and vitamins’ and ‘amino acid metabolism’ were more represented in all-grass-fed geese than in high-grain-fed geese (63 versus 39).

## Discussion

The goose relies on the consumption of a certain amount of fibre that can be digested by the microbiota. Accumulating evidence emphasizes the tight interactions between the gut microbiota and the diet [30–33], but until now, no reports had explored the adaptive responses of



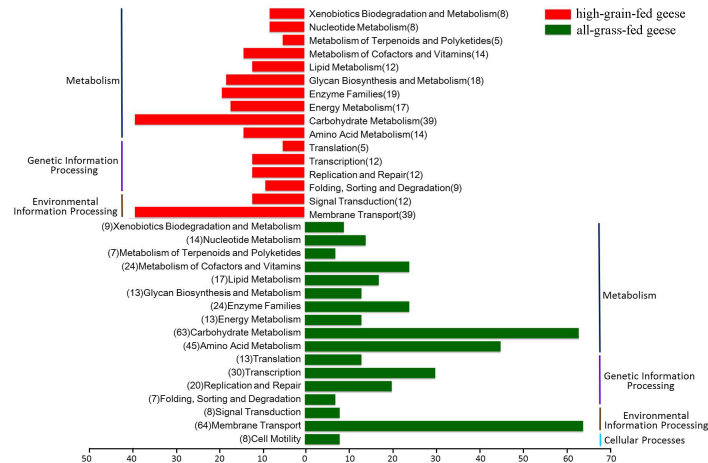

**Fig 6. Enrichment analysis of KEGG to predict functions of gut microbiota between all-grass-fed geese and high-grain-fed geese.** The total OTU distribution between groups was tested using bootstrap Mann-Whitney U-test with a cutoff of  $P < 0.05$ . The brackets indicate the number of KEGG-related pathways.

<https://doi.org/10.1371/journal.pone.0185590.g006>

the goose gut microbiota to grass feeding. In this study, we compared the characterization of bacterial communities between all-grass-fed geese and high-grain-fed geese. The goose microbiota was richer in OTUs and higher in alpha diversity when fed grass diet compared to grain diet. Previous studies have established that Shannon’s diversity index varied from 3 to 6 in the chicken caecal microbiota [34, 35], while varied from 7 to 9 in the caecal microbiota of rabbit [19], goat [33] and swine [36]. In this study, we found the average Shannon’s diversity index was about 4.2. Our comparative analysis found that the goose gut microbial diversity was similar to that of the chicken, but relatively less than mammalian species. We also noticed that the microbial diversity in all-grass-fed geese was significantly higher than that of high-grain-fed geese. In theory, a high level of diversity provides “functional redundancy” that helps maintain the stability of intestinal microbiota after environmental stress [37]. From this point, the gut microbiota may be more stable in all-grass-fed geese than high-grain-fed geese. We also detected large variations within the faecal microbiota from the Shannon and Simpson indices across different individuals; these variations may be distinct from those between grass-fed and grain-fed samples by unweighted UniFrac analysis. Similar results have been observed in chickens [38]. Hence, the results further confirmed that faecal microbiota do not provide a complete indication of the caecal community structure. In human studies, it has been suggested that faecal samples do not accurately reflected the population of the gut microbiota [39, 40]. In addition, Zhao et al have proved that the porcine microbial profile in feces was only the similar to those in the small intestine [41].

The goose is herbivorous; therefore, cellulose-degrading bacteria are particularly important for food degradation, especially when fed a high-cellulose diet. In the present work, regardless of diet, the dominant phyla appear to be Bacteroidetes and Firmicutes, which are typically enriched in other herbivores [42, 43]. However, the ratio of Firmicutes to Bacteroidetes differs in grass-fed geese and grain-fed geese, and a higher proportion of Firmicutes and a lower proportion of Bacteroidetes emerged in the grass-fed geese. In humans, the proportion of Firmicutes to Bacteroidetes (the F/B ratio) decreased on a low-calorie diet [44]. In our study, the grass diet was a low-calorie diet compared to the high-grain diet, but the F/B ratio of goose showed the opposite trend from that of humans. This may be due to differences in co-evolution between the gut microbiota of the host (human or avian) and diet. Surprisingly, Fusobacteria and Deferribacteres were highly abundance in high-grain-fed geese, while few in grass-

fed geese, which was further confirmed by LEfSe analyses. These results suggest that Fusobacteria and Deferribacteres microbiota have adapted to digest the high-grain diet under the intensive systems. At the family level, Ruminococcaceae (Firmicutes) and Bacteroides (Bacteroidetes) were present exclusively in all-grass-fed geese and high-grain-fed geese, respectively. As a family of cellulose-degrading bacteria, the Ruminococcaceae has been widely confirmed to digest cellulose in human and the other animals [45–47].

Furthermore, of the 75 OTUs that were found to show significant differences in abundance between the birds of two dietary treatment geese, the majority are classified as Firmicutes (54 OTUs) with some Bacteroidetes (14 OTUs). Different OTUs belonging to the family Lachnospiraceae were found to be significantly higher in grass-fed geese. Lachnospiraceae are known butyrate producers [48], and perhaps the increased butyrate production helps to stimulate gastric cells proliferation and increase nutrients absorption [49, 50].

In the present study, the dominant bacterial community associated with the caecum in grain-fed geese (64.7%) was higher compared to grass-fed geese (47.3%), specifically in *Bacteroidaceae* which was more abundant in grain-fed geese (31.6%) than grass-fed geese (6.6%). The other microbiota community of goose from NCBI (ERR011376) also showed *Bacteroidaceae* was predominant bacterial community with an abundance of 43.03%. From the research above, Bacteroidetes may be considered as a dominant microbiota in goose. Zeng *et al.* (2015) studied the bacterial communities associated with body weight of Rex rabbits and found that the members of *Bacteroidaceae* were significantly enriched in high-weight rabbits [19]. In our study, we also measured the body weights of geese receiving different diets. The body weight of 70-day-old geese on the high-grain diet ( $2712.5 \pm 327.2$ g) was higher than that of geese on the grass diet ( $2630.0 \pm 309.3$ g) (S6 Table). Therefore, the members of *Bacteroidaceae* might contribute to the growth of animals.

With respect to metabolic pathways, a remarkable enrichment was observed in pathways relating to carbohydrate metabolism, metabolism of cofactors and vitamins, and amino acid metabolism in all-grass-fed geese. Due to the cellulose belonging to carbohydrate, those bacterial metabolic pathways might be more effective in cellulose digestion in the grass. PICRUSt provides important insight into bacterial community functions in the goose gut. Other omics approaches (e.g. transcriptomics and metabolomics) are desired to confirm these discoveries and improve our understanding of bacterial function in the goose gut.

## Conclusions

In summary, we presented comparative characterization of bacterial communities in geese fed all-grass or high-grain diets, and found The diets had significant effects in shaping the microbial community. Bacterial profile was primarily predominated by Firmicutes in all-grass-fed geese and Bacteroidetes in high-grain-fed geese, respectively. In addition, some specific microorganisms including the Ruminococcaceae, Lachnospiraceae and Bacteroidaceae were identified which may associated with cellulose-degrading. Furthermore, the presence of the dominant communities composed predominantly of the Lachnospiraceae and Rikenellaceae, which were involved mainly in the carbohydrate metabolism in all-grass-fed geese. Thus, the study may provide foundation for further investigated the role of specific microbes in efficiency digestion products research of goose.

## Supporting information

**S1 Table. Sequences summary.**  
(XLS)

**S2 Table. OTU and taxonomy information of caecum and faeces from grass-feed geese and high grain-feed geese.**

(XLS)

**S3 Table. Relative abundance of each OTU significant ( $P < 0.05$ ) for different diet and its classification.**

(XLS)

**S4 Table. Classification of the dominant bacterial community in the caecum from grass-fed geese and high grain-fed geese.**

(XLS)

**S5 Table. Prediction of KEGG pathways based on differentially represented OTUs.**

(XLS)

**S6 Table. The body weight of 70-day-old geese fed with all-grass diet and high-grain diet.**

(DOC)

## Acknowledgments

We are grateful to Hua Chen in Shanghai BIOZERON Biotechnology Co., Ltd. for advice on data analysis.

## Author Contributions

**Conceptualization:** Qi Xu, Guohong Chen.

**Data curation:** Qi Xu, Yang Zhang, Wenming Zhao.

**Investigation:** Qi Xu, Xiaoya Yuan, Tiantian Gu, Yang Li, Yadong Song.

**Methodology:** Qi Xu, Wangcheng Dai, Xiaokun Shen, Guobin Chang.

**Writing – original draft:** Qi Xu, Guohong Chen.

**Writing – review & editing:** Qi Xu, Guohong Chen.

## References

1. Niu Q, Li P, Hao S, Zhang Y, Kim SW, Li H, et al. Dynamic Distribution of the Gut Microbiota and the Relationship with Apparent Crude Fiber Digestibility and Growth Stages in Pigs. *Scientific reports*. 2015; 5.
2. Wu S, Wang G, Angert ER, Wang W, Li W, Zou H. Composition, diversity, and origin of the bacterial community in grass carp intestine. *PloS one*. 2012; 7(2):e30440–e. <https://doi.org/10.1371/journal.pone.0030440> PMID: 22363439
3. Ley RE, Hamady M, Lozupone C, Turnbaugh PJ, Ramey RR, Bircher JS, et al. Evolution of mammals and their gut microbes. *Science*. 2008; 320(5883):1647–51. <https://doi.org/10.1126/science.1155725> PMID: 18497261
4. Ley RE, Lozupone CA, Hamady M, Knight R, Gordon JI. Worlds within worlds: evolution of the vertebrate gut microbiota. *Nature Reviews Microbiology*. 2008; 6(10):776–88. <https://doi.org/10.1038/nrmicro1978> PMID: 18794915
5. Muegge BD, Kuczynski J, Knights D, Clemente JC, Gonznzrlds within worlds: evolution of the vertebrate gut microbiota. *Nature Reviews Microbiology*. 2008; 6(10):776–88. Stages in Pigs. *Scientific reports*. 2015; <https://doi.org/10.1038/nrmicro1978>
6. Brulc JM, Antonopoulos DA, Miller MEB, Wilson MK, Yannarell AC, Dinsdale EA, et al. Gene-centric metagenomics of the fiber-adherent bovine rumen microbiome reveals forage specific glycoside hydrolases. *Proceedings of the National Academy of Sciences*. 2009; 106(6):1948–53.

7. Pope P, Denman S, Jones M, Tringe S, Barry K, Malfatti S, et al. Adaptation to herbivory by the Tammar wallaby includes bacterial and glycoside hydrolase profiles different from other herbivores. *Proceedings of the National Academy of Sciences*. 2010; 107(33):14793–8.
8. Toyoda A, Iio W, Mitsumori M, Minato H. Isolation and identification of cellulose-binding proteins from sheep rumen contents. *Applied and environmental microbiology*. 2009; 75(6):1667–73. <https://doi.org/10.1128/AEM.01838-08> PMID: 19151184
9. Hess M, Sczyrba A, Egan R, Kim T-W, Chokhawala H, Schroth G, et al. Metagenomic discovery of biomass-degrading genes and genomes from cow rumen. *Science*. 2011; 331(6016):463–7. <https://doi.org/10.1126/science.1200387> PMID: 21273488
10. Perumbakkam S, Mitchell EA, Craig AM. Changes to the rumen bacterial population of sheep with the addition of 2, 4, 6-trinitrotoluene to their diet. *Antonie Van Leeuwenhoek*. 2011; 99(2):231–40. <https://doi.org/10.1007/s10482-010-9481-x> PMID: 20607404
11. Chen G, Wang J, He D, Wang Z, Wang B. *Goose production in China*. Beijing: China Agriculture Press; 2013.
12. He LW, Meng QX, Li DY, Zhang YW, Ren LP. Influence of feeding alternative fiber sources on the gastrointestinal fermentation, digestive enzyme activities and mucosa morphology of growing Greylag geese. *Poultry science*. 2015; 94(10):2464–71. <https://doi.org/10.3382/ps/pev237> PMID: 26316338
13. Zhou H, Gao Y, Gao G, Lou Y. Oral Administration of Recombinant *Lactococcus lactis* Expressing the Cellulase Gene Increases Digestibility of Fiber in Geese. *Current Microbiology*. 2015; 71(6):693–8. <https://doi.org/10.1007/s00284-015-0904-9> PMID: 26341925
14. Durant D. The digestion of fibre in herbivorous Anatidae—A review. *Wildfowl*. 2003; 54:7–24.
15. Liu B. Molecular diversity of microorganisms in the gut of Yangzhou geese and its consequences of dietary fiber level variety. Yangzhou University. 2012:2–5.
16. Mattocks JG. Goose feeding and cellulose digestion. *Wildfowl*. 1971; 22(3):107–13.
17. Lou YJ, Liu HL, Wang J, Sun ZJ. Determination and comparison of digestion kinetics of two fibre sources in geese (*Anseris*). *South African Journal of Animal Science*. 2010; 40(1):535–625.
18. Dougal K, de la Fuente G, Harris PA, Girdwood SE, Pinloche E, Geor RJ, et al. Characterisation of the faecal bacterial community in adult and elderly horses fed a high fibre, high oil or high starch diet using 454 pyrosequencing. *PLoS one*. 2014; 9(2):e87424. <https://doi.org/10.1371/journal.pone.0087424> PMID: 24504261
19. Zeng B, Han S, Wang P, Wen B, Jian W, Guo W, et al. The bacterial communities associated with fecal types and body weight of rex rabbits. *Scientific reports*. 2015; 5.
20. Dennis KL, Wang Y, Blatner NR, Wang S, Saadalla A, Trudeau E, et al. Adenomatous polyps are driven by microbe-instigated focal inflammation and are controlled by IL-10-producing T cells. *Cancer Research*. 2013; 73(19):5905–13. <https://doi.org/10.1158/0008-5472.CAN-13-1511> PMID: 23955389
21. Caporaso JG, Kuczynski J, Stombaugh J, Bittinger K, Bushman FD, Costello EK, et al. QIIME allows analysis of high-throughput community sequencing data. *Nature methods*. 2010; 7(5):335–6. <https://doi.org/10.1038/nmeth.f.303> PMID: 20383131
22. Edgar RC. UPARSE: highly accurate OTU sequences from microbial amplicon reads. *Nature Methods*. 2013; 10(10):996–8. <https://doi.org/10.1038/nmeth.2604> PMID: 23955772
23. Wang Q, Garrity GM, Tiedje JM, Cole JR. Naive Bayesian classifier for rapid assignment of rRNA sequences into the new bacterial taxonomy. *Applied and environmental microbiology*. 2007; 73(16):5261–7. <https://doi.org/10.1128/AEM.00062-07> PMID: 17586664
24. Schloss PD, Westcott SL, Ryabin T, Hall JR, Hartmann M, Hollister EB, et al. Introducing mothur: open-source, platform-independent, community-supported software for describing and comparing microbial communities. *Applied & Environmental Microbiology*. 2009; 75(23):7537–41.
25. Lozupone C, Knight R. UniFrac: a New Phylogenetic Method for Comparing Microbial Communities. *Applied and Environmental Microbiology*. 2005; 71(12):8228–35. <https://doi.org/10.1128/AEM.71.12.8228-8235.2005> PMC1317376. PMID: 16332807
26. Segata N, Izard J, Waldron L, Gevers D, Miropolsky L, Garrett WS, et al. Metagenomic biomarker discovery and explanation. *Genome Biol*. 2011; 12(6):R60. <https://doi.org/10.1186/gb-2011-12-6-r60> PMID: 21702898
27. Langille MG, Zaneveld J, Caporaso JG, McDonald D, Knights D, Reyes JA, et al. Predictive functional profiling of microbial communities using 16S rRNA marker gene sequences. *Nature biotechnology*. 2013; 31(9):814–21. <https://doi.org/10.1038/nbt.2676> PMID: 23975157
28. Team RC. R: A language and environment for statistical computing. 2013.

29. White JR, Nagarajan N, Pop M. Statistical methods for detecting differentially abundant features in clinical metagenomic samples. *PLoS Comput Biol*. 2009; 5(4):e1000352. <https://doi.org/10.1371/journal.pcbi.1000352> PMID: 19360128
30. De Filippo C, Cavalieri D, Di Paola M, Ramazzotti M, Poullet JB, Massart S, et al. Impact of diet in shaping gut microbiota revealed by a comparative study in children from Europe and rural Africa. *Proceedings of the National Academy of Sciences*. 2010; 107(33):14691–6.
31. Wu GD, Chen J, Hoffmann C, Bittinger K, Chen Y-Y, Keilbaugh SA, et al. Linking long-term dietary patterns with gut microbial enterotypes. *Science*. 2011; 334(6052):105–8. <https://doi.org/10.1126/science.1208344> PMID: 21885731
32. Claesson MJ, Jeffery IB, Conde S, Power SE, O, O, Keilbaugh SA, et al. Linking long-term dietary patterns with gut microbial enterotypes. *Science*. 2011; 334(6052):105–8. from Europe <https://doi.org/10.1126/science.1208344> PMID: 21885731
33. Liu J, Xu T, Zhu W, Mao S. High-grain feeding alters caecal bacterial microbiota composition and fermentation and results in caecal mucosal injury in goats. *British Journal of Nutrition*. 2014; 112(03):416–27.
34. Sergeant MJ, Constantinidou C, Cogan TA, Bedford MR, Penn CW, Pallen MJ. Extensive microbial and functional diversity within the chicken cecal microbiome. *PloS one*. 2014; 9(3):e91941. <https://doi.org/10.1371/journal.pone.0091941> PMID: 24657972
35. Stanley D, Geier MS, Hughes RJ, Denman SE, Moore RJ. Highly variable microbiota development in the chicken gastrointestinal tract. *PloS one*. 2013; 8(12):e84290. <https://doi.org/10.1371/journal.pone.0084290> PMID: 24391931
36. Kim HB, Borewicz K, White BA, Singer RS, Sreevatsan S, Tu ZJ, et al. Microbial shifts in the swine distal gut in response to the treatment with antimicrobial growth promoter, tylosin. *Proceedings of the National Academy of Sciences*. 2012; 109(38):15485–90.
37. Xue Z, Zhang W, Wang L, Hou R, Zhang M, Fei L, et al. The Bamboo-Eating Giant Panda Harbors a Carnivore-Like Gut Microbiota, with Excessive Seasonal Variations. *mBio*. 2015; 6(3):e00022–15. <https://doi.org/10.1128/mBio.00022-15> PMID: 25991678
38. Stanley D, Geier MS, Chen H, Hughes RJ, Moore RJ. Comparison of fecal and cecal microbiotas reveals qualitative similarities but quantitative differences. *BMC microbiology*. 2015; 15(1):51.
39. Eckburg PB, Bik EM, Bernstein CN, Purdom E, Dethlefsen L, Sargent M, et al. Diversity of the human intestinal microbial flora. *science*. 2005; 308(5728):1635–8. <https://doi.org/10.1126/science.1110591> PMID: 15831718
40. Durburb PB, Bik EM, Bernstein CN, Purdom E, Dethlefsen L, Sargent M, et al. Diversity of the human intestinal microbial flora. *science*. 2005; 308(5728):1635–8. *microbiology*. 2015 <https://doi.org/10.1126/science.1110591> PMID: 15831718
41. Zhao W, Wang Y, Liu S, Huang J, Zhai Z, He C, et al. The dynamic distribution of porcine microbiota across different ages and gastrointestinal tract segments. *PloS one*. 2015; 10(2):e0117441. <https://doi.org/10.1371/journal.pone.0117441> PMID: 25688558
42. Matsui H, Kato Y, Chikaraishi T, Moritani M, Ban-Tokuda T, Wakita M. Microbial diversity in ostrich ceca as revealed by 16S ribosomal RNA gene clone library and detection of novel *Fibrobacter* species. *Anaerobe*. 2009; 16(2):83–93. <https://doi.org/10.1016/j.anaerobe.2009.07.005> PMID: 19632349
43. Pope PB, Moran NA. Adaptation to herbivory by the Tammar wallaby includes bacterial and glycoside hydrolase profiles different from other herbivores. *Proceedings of the National Academy of Sciences*. 2010; 107(33):14793–8.
44. De FC, Cavalieri D, Di PM, Ramazzotti M, Poullet JB, Massart S, et al. Impact of diet in shaping gut microbiota revealed by a comparative study in children from Europe and rural Africa. *Proceedings of the National Academy of Sciences of the United States of America*. 2010; 107(33):14691–6. <https://doi.org/10.1073/pnas.1005963107> PMID: 20679230
45. Escobar JS, Klotz B, Valdes BE, Agudelo GM. The gut microbiota of Colombians differs from that of Americans, Europeans and Asians. *BMC microbiology*. 2014; 14(1):311.
46. Jami E, Mizrahi I. Composition and similarity of bovine rumen microbiota across individual animals. *PloS one*. 2012; 7(3):e33306. <https://doi.org/10.1371/journal.pone.0033306> PMID: 22432013
47. Daly K, Proudman CJ, Duncan SH, Flint HJ, Dyer J, Shirazi-Beechey SP. Alterations in microbiota and fermentation products in equine large intestine in response to dietary variation and intestinal disease. *British Journal of Nutrition*. 2012; 107(07):989–95.
48. Jalanka-Tuovinen J, Salonen A, Nikkilä J, Immonen O, Kekkonen R, Lahti L, et al. Intestinal microbiota in healthy adults: temporal analysis reveals individual and common core and relation to intestinal symptoms. *PloS one*. 2011; 6(7):e23035. <https://doi.org/10.1371/journal.pone.0023035> PMID: 21829582

49. Mazzoni M, Le GM, De FS, Minieri L, Trevisi P, Wolinski J, et al. Supplemental sodium butyrate stimulates different gastric cells in weaned pigs. *Journal of Nutrition*. 2008; 138(8):1426–31. PMID: [18641186](https://pubmed.ncbi.nlm.nih.gov/18641186/)
50. Guilloreau P, Savary G, Jaguelin-Peyrault Y, RomRomnski J, et al. Supplemental sodium butyrate stimulates dimentation increases digestibility and pancreatic secretion in young milk-fed calves—*Journal of Dairy Science*. *Journal of Dairy Science*. 2010; 93(12):5842–50. <https://doi.org/10.3168/jds.2009-2751>
