# Supplementary material for: Comparative characterization of bacterial communities in geese fed all-grass or high-grain diets
Source: PLoS One. 2017 Oct 3;12(10):e0185590. doi: 10.1371/journal.pone.0185590 (PMC5626430; doi:10.1371/journal.pone.0185590)
Supplement: S2 Table — (XLS) [file pone.0185590.s002.xls]

## Sheet: otu_taxa_table
S2 Table OTU and Taxonomy information of caecum and faeces from grass-feed geese and high grain-feed geese
OTU ID	Samples																Taxonomy
	Gf1	Gf2	Gf3	Gf4	Gc1	Gc2	Gc3	Gc4	Ff1	Ff2	Ff3	Ff4	Fc1	Fc2	Fc3	Fc4	phylum	class	order	family	genus	species
OTU1	0	13	0	0	0	0	0	0	1	0	0	10	0	0	0	3	Firmicutes	Negativicutes	Selenomonadales	Veillonellaceae	Megasphaera	uncultured_bacterium
OTU2	0	0	0	0	0	0	0	0	0	1	5	3	0	0	0	0	Actinobacteria	Actinobacteria	Streptosporangiales	Thermomonosporaceae	Actinomadura
OTU3	9	0	2	15	30	20	17	56	2	4	1	2	41	39	136	10	Firmicutes	Clostridia	Clostridiales	Ruminococcaceae
OTU4	0	0	0	0	4	1	5	2	0	0	0	0	0	0	0	0	Firmicutes	Clostridia	Clostridiales	Defluviitaleaceae
OTU5	0	0	0	0	25	0	0	1	0	1	43	7	0	0	0	0	Firmicutes	Bacilli	Lactobacillales	Lactobacillaceae	Lactobacillus	Lactobacillus_intermedius
OTU6	5	0	0	0	0	4	7	0	2	0	0	0	3	1	0	13	Bacteroidetes	Bacteroidia	Bacteroidales	Rikenellaceae	Alistipes
OTU7	0	10	0	0	0	0	0	0	0	0	0	0	0	0	0	0	Verrucomicrobia	Verrucomicrobiae	Verrucomicrobiales	Verrucomicrobiaceae	Akkermansia
OTU8	0	0	10	0	0	1	0	0	1	0	131	69	0	0	0	0	Firmicutes	Bacilli	Bacillales	Planococcaceae	Incertae_Sedis	uncultured_bacterium
OTU9	5	0	0	11	28	6	12	14	1	0	0	0	0	2	0	1	Firmicutes	Clostridia	Clostridiales	Ruminococcaceae	Anaerotruncus	uncultured_bacterium
OTU10	0	0	0	0	0	0	0	0	0	1	0	0	3	0	2	2	Proteobacteria	Gammaproteobacteria	Aeromonadales	Succinivibrionaceae	Anaerobiospirillum	Anaerobiospirillum_succiniciproducens
OTU11	21	0	5	60	51	62	18	64	8	4	2	7	3	36	55	15	Firmicutes	Clostridia	Clostridiales	Ruminococcaceae	Anaerofilum	uncultured_bacterium
OTU12	976	9	37	38	8	5	23	10	2	0	0	3	0	0	0	0	Firmicutes	Bacilli	Lactobacillales	Lactobacillaceae	Lactobacillus	Lactobacillus_amylovorus
OTU13	0	0	0	0	0	0	0	0	0	0	0	5	0	1	0	1	Actinobacteria	Actinobacteria	Micrococcales	Cellulomonadaceae	Cellulomonas	Cellulomonas_cellasea
OTU14	0	0	0	3	0	0	0	0	0	16	0	0	25	32	2	41	Bacteroidetes	Bacteroidia	Bacteroidales	Bacteroidaceae	Bacteroides
OTU15	13	5	0	1	3	6	1	2	2	0	0	0	0	2	0	10	Firmicutes	Clostridia	Clostridiales	Ruminococcaceae	uncultured	Eubacterium_coprostanoligenes
OTU16	1	2	0	0	0	0	0	0	96	76	0	2	158	11	1843	39	Bacteroidetes	Bacteroidia	Bacteroidales	Bacteroidaceae	Bacteroides	uncultured_bacterium
OTU17	0	0	0	3	5	1	1	1	0	0	0	0	0	0	0	1	Firmicutes	Clostridia	Clostridiales	Ruminococcaceae
OTU18	0	0	0	0	0	0	0	0	2	0	0	1	0	0	1	0	Bacteroidetes	Bacteroidia	Bacteroidales	Rikenellaceae	Rikenella	uncultured_bacterium
OTU19	3	10	34	0	0	0	0	0	10	0	33	68	0	1	0	1	Firmicutes	Bacilli	Bacillales	Bacillaceae	Bacillus
OTU20	1	4	4	0	0	0	0	0	7	0	0	6	0	0	0	1	Firmicutes	Bacilli	Lactobacillales	Leuconostocaceae	Leuconostoc	Leuconostoc_lactis
OTU21	0	0	0	0	0	0	0	0	0	0	1	0	17	0	0	0	Proteobacteria	Gammaproteobacteria	Pasteurellales	Pasteurellaceae	Haemophilus	Haemophilus_parainfluenzae_T3T1
OTU22	5	2	1	7	8	19	4	2	8	11	1	15	3	5	1	7	Firmicutes	Clostridia	Clostridiales	Lachnospiraceae	Blautia
OTU23	0	279	0	0	0	0	0	0	0	0	0	0	0	0	0	0	Bacteroidetes	Bacteroidia	Bacteroidales	S24-7	no rank	uncultured_bacterium
OTU24	0	0	33	0	1	0	0	0	0	0	4	1	0	0	0	0	Firmicutes	Bacilli	Lactobacillales	Streptococcaceae	Streptococcus
OTU25	88	1	0	10	8	40	38	17	5	1	0	0	3	6	1	4	Bacteroidetes	Bacteroidia	Bacteroidales	Prevotellaceae	uncultured	uncultured_bacterium
OTU26	0	0	0	0	2	0	4	0	0	0	0	0	0	3	4	0	Firmicutes	Clostridia	Clostridiales	vadinBB60	no rank
OTU27	6	0	0	1	4	0	17	0	0	0	0	0	0	0	0	0	Spirochaetae	Spirochaetes	Spirochaetales	Spirochaetaceae	Spirochaeta
OTU28	0	0	0	0	0	0	0	0	0	4	0	0	9	0	5	2	Bacteroidetes	Bacteroidia	Bacteroidales	Rikenellaceae	RC9_gut_group
OTU29	1	1	0	4	0	2	7	1	0	0	0	0	0	0	0	0	Firmicutes	Bacilli	Lactobacillales	Lactobacillaceae	Pediococcus	Pediococcus_pentosaceus
OTU30	1	14	7	0	0	0	0	0	4	0	0	7	0	0	0	0	Firmicutes	Bacilli	Lactobacillales	Leuconostocaceae	Leuconostoc	Leuconostoc_gasicomitatum
OTU32	0	128	0	0	0	0	0	0	0	0	0	0	0	0	0	0	Firmicutes	Clostridia	Clostridiales	Lachnospiraceae	Blautia	Lachnospiraceae_bacterium_615
OTU33	0	0	0	0	0	0	0	0	0	0	0	19	0	0	0	0	Proteobacteria	Gammaproteobacteria	Pseudomonadales	Moraxellaceae	Psychrobacter	Psychrobacter_faecalis
OTU34	3	0	7	59	23	12	17	2	0	2	0	1	0	1	1	0	Firmicutes	Clostridia	Clostridiales	Ruminococcaceae	uncultured
OTU35	1	0	1	17	18	20	17	34	0	0	0	0	2	1	0	2	Firmicutes	Clostridia	Clostridiales	Ruminococcaceae	Oscillibacter
OTU36	0	0	1	0	0	0	0	0	15	52	0	0	8	0	0	0	Actinobacteria	Actinobacteria	Bifidobacteriales	Bifidobacteriaceae	Bifidobacterium
OTU37	0	0	0	1	3	0	3	0	0	0	0	0	0	0	0	0	Firmicutes	Clostridia	Clostridiales	Christensenellaceae	uncultured
OTU38	1	0	0	0	0	5	4	0	0	1	0	0	0	1	0	2	Bacteroidetes	Bacteroidia	Bacteroidales	Porphyromonadaceae	Coprobacter
OTU39	18	1	2	5	0	1	6	0	0	0	0	0	0	0	0	0	Firmicutes	Bacilli	Lactobacillales	Lactobacillaceae	Lactobacillus
OTU40	14	1	1	34	2	27	48	4	0	0	0	0	0	0	0	0	Firmicutes	Clostridia	Clostridiales	Ruminococcaceae
OTU41	15	0	6	4	1	6	2	0	54	9	0	2	37	3	5	1	Firmicutes	Clostridia	Clostridiales	Ruminococcaceae	Incertae_Sedis	Clostridiales_bacterium_DJF_B152
OTU42	0	1	1	0	0	11	0	1	1	0	0	0	0	0	0	0	Firmicutes	Clostridia	Clostridiales	Lachnospiraceae
OTU43	0	92	0	0	0	0	0	0	0	0	0	0	0	0	0	0	Bacteroidetes	Bacteroidia	Bacteroidales	Porphyromonadaceae	Paludibacter	uncultured_Bacteroidetes_bacterium
OTU44	2	0	0	0	0	0	0	3	2	0	0	17	0	9	967	21	Deferribacteres	Deferribacteres	Deferribacterales	Deferribacteraceae	Mucispirillum
OTU45	0	0	0	0	0	0	0	0	0	2	0	0	2	4	0	4	Bacteroidetes	Bacteroidia	Bacteroidales	Prevotellaceae	Alloprevotella	gut_metagenome
OTU47	4	2	1	77	95	230	21	95	2	0	1	3	0	14	1	3	Firmicutes	Clostridia	Clostridiales	Lachnospiraceae
OTU48	69	8	48	32	71	80	27	25	60	54	3	6	21	4	11	1	Firmicutes	Erysipelotrichia	Erysipelotrichales	Erysipelotrichaceae	uncultured
OTU49	0	0	0	0	0	0	0	0	0	3	0	0	7	0	38	0	Tenericutes	Mollicutes	Anaeroplasmatales	Anaeroplasmataceae	Anaeroplasma	gut_metagenome
OTU50	9	7	2	50	43	74	9	112	0	0	0	0	0	4	0	4	Firmicutes	Clostridia	Clostridiales	Lachnospiraceae
OTU51	0	3	0	0	0	0	0	0	0	0	0	0	0	0	0	0	Firmicutes	Clostridia	Clostridiales	Ruminococcaceae	Ruminococcus
OTU52	0	194	0	0	0	0	0	0	0	0	0	0	0	0	0	0	Firmicutes	Clostridia	Clostridiales	Lachnospiraceae	Blautia
OTU53	2	0	0	0	0	0	0	0	464	276	52	35	8	17	44	12	Actinobacteria	Actinobacteria	Coriobacteriales	Coriobacteriaceae
OTU54	1488	15	40	283	429	208	57	169	2065	377	35	99	86	102	472	58	Firmicutes	Clostridia	Clostridiales	Ruminococcaceae	Subdoligranulum	uncultured_bacterium
OTU55	11	10	6	217	46	61	93	10	155	2614	44	104	2737	1624	2556	3473	Bacteroidetes	Bacteroidia	Bacteroidales	Bacteroidaceae	Bacteroides
OTU56	19	0	0	36	0	0	0	0	0	0	0	0	0	0	0	0	Firmicutes	Clostridia	Clostridiales	Ruminococcaceae	Anaerotruncus
OTU57	0	0	0	0	0	0	0	0	0	0	0	8	0	21	18	5	Bacteroidetes	Bacteroidia	Bacteroidales	Rikenellaceae	RC9_gut_group	uncultured_bacterium
OTU58	2	0	3	1	5	6	1	2	0	0	0	0	0	0	0	1	Tenericutes	Mollicutes	RF9	no rank	no rank	Firmicutes_bacterium_CAG:822
OTU59	0	94	0	0	0	0	0	0	0	0	0	0	0	0	0	0	Bacteroidetes	Bacteroidia	Bacteroidales	Porphyromonadaceae	Macellibacteroides	uncultured_bacterium
OTU60	3	0	0	0	0	0	0	1	0	0	0	0	0	0	0	0	Firmicutes	Clostridia	Clostridiales	Lachnospiraceae	Incertae_Sedis
OTU61	0	731	0	0	0	0	0	0	0	0	0	0	0	0	0	0	Bacteroidetes	Bacteroidia	Bacteroidales	S24-7	no rank	uncultured_Bacteroidales_bacterium
OTU62	0	0	0	0	0	0	0	19	0	0	0	0	0	1	0	0	Cyanobacteria	Cyanobacteria	Gastranaerophilales	no rank	no rank	uncultured_bacterium
OTU63	0	2	2	0	0	0	0	0	2	0	0	0	0	0	0	0	Proteobacteria	Gammaproteobacteria	Aeromonadales	Succinivibrionaceae	uncultured	uncultured_rumen_bacterium
OTU64	0	0	0	20	14	5	6	11	0	0	0	0	0	0	0	0	Firmicutes	Clostridia	Clostridiales	Ruminococcaceae
OTU65	3	0	2	15	45	7	3	11	0	0	0	0	0	3	0	4	Firmicutes	Clostridia	Clostridiales	Ruminococcaceae	Anaerotruncus
OTU66	0	4	1	0	0	0	0	0	4	0	0	3	0	0	0	0	Firmicutes	Negativicutes	Selenomonadales	Acidaminococcaceae	Phascolarctobacterium	uncultured_Veillonellaceae_bacterium
OTU67	0	7	0	0	0	1	3	0	0	0	0	0	0	1	0	0	Proteobacteria	Alphaproteobacteria	Rhodospirillales	Rhodospirillaceae	Thalassospira	uncultured_bacterium
OTU68	31	4	7	43	89	31	29	65	4	0	0	2	2	7	4	5	Firmicutes	Clostridia	Clostridiales	Ruminococcaceae	Incertae_Sedis
OTU69	0	3	0	0	0	0	0	0	0	0	0	0	0	0	0	0	Firmicutes	Clostridia	Clostridiales	Ruminococcaceae	Ruminococcus	Ruminococcus_sp._80/3
OTU70	2	1	2	0	0	0	0	0	3	0	0	0	0	0	0	0	Proteobacteria	Gammaproteobacteria	Pseudomonadales	Moraxellaceae	Enhydrobacter	Moraxella_osloensis
OTU71	0	0	4	55	28	1	378	0	0	4	0	1	1	221	1	127	Lentisphaerae	RFP12_gut_group	no rank	no rank	no rank
OTU73	0	0	1	10	9	10	2	10	3	0	0	0	1	0	1	1	Firmicutes	Erysipelotrichia	Erysipelotrichales	Erysipelotrichaceae	uncultured	uncultured_bacterium
OTU74	2	1	0	11	6	16	23	9	2	2	0	0	10	38	11	13	Firmicutes	Clostridia	Clostridiales	Ruminococcaceae
OTU75	0	0	0	0	0	0	0	0	0	0	0	8	0	0	0	0	Proteobacteria	Alphaproteobacteria	Sphingomonadales	Sphingomonadaceae	Sphingomonas
OTU76	6	0	0	12	0	0	0	0	0	0	0	0	0	0	0	0	Firmicutes	Clostridia	Clostridiales	Defluviitaleaceae	Incertae_Sedis
OTU77	0	0	0	0	0	0	0	0	0	0	23	0	0	0	0	0	Firmicutes	Bacilli	Lactobacillales	Lactobacillaceae	Lactobacillus
OTU78	1	0	0	9	13	6	2	17	0	0	0	0	0	0	0	0	Firmicutes	Clostridia	Clostridiales	Ruminococcaceae
OTU79	1	0	0	3	4	0	3	2	0	0	0	0	0	0	0	0	Firmicutes	Clostridia	Clostridiales	Lachnospiraceae
OTU80	0	38	0	0	0	0	0	0	0	0	0	0	0	0	0	0	Chloroflexi	Anaerolineae	Anaerolineales	Anaerolineaceae	Longilinea	uncultured_bacterium
OTU81	0	0	0	0	0	0	0	0	0	4	1	12	10	9	80	24	Bacteroidetes	Bacteroidia	Bacteroidales	Rikenellaceae
OTU82	0	2	0	0	0	1	2	0	0	0	0	0	0	2	0	0	Cyanobacteria	Cyanobacteria	Gastranaerophilales	no rank	no rank	uncultured_rumen_bacterium
OTU83	0	0	0	0	0	0	0	0	0	0	0	0	0	10	0	1	Firmicutes	Clostridia	Clostridiales	vadinBB60	no rank
OTU84	0	75	0	0	0	0	0	0	0	0	0	0	0	0	0	0	Proteobacteria	Deltaproteobacteria	Desulfovibrionales	Desulfovibrionaceae	Desulfovibrio	Desulfovibrio_sp._ABHU1SB
OTU85	0	0	0	0	0	0	0	0	0	12	24	0	0	0	0	0	Deinococcus-Thermus	Deinococci	Deinococcales	Deinococcaceae	Deinococcus
OTU86	0	2	0	0	0	0	0	0	0	0	1	1	0	1	0	0	Actinobacteria	Actinobacteria	Micrococcales	Microbacteriaceae	Alpinimonas	uncultured_bacterium
OTU88	1	1	0	6	30	7	8	29	0	0	0	0	0	0	0	1	Firmicutes	Clostridia	Clostridiales	Ruminococcaceae	uncultured
OTU89	0	141	0	0	0	0	0	0	0	0	0	0	0	0	0	0	Bacteroidetes	Bacteroidia	Bacteroidales	Porphyromonadaceae	Proteiniphilum
OTU90	3	0	1	4	1	10	3	1	0	0	0	0	2	0	0	0	Firmicutes	Clostridia	Clostridiales	Lachnospiraceae
OTU91	76	1	0	0	0	2	0	1	0	0	0	0	0	0	0	0	Bacteroidetes	Bacteroidia	Bacteroidales	Prevotellaceae	uncultured	uncultured_bacterium
OTU93	1	1	0	0	0	0	0	0	0	0	0	0	0	0	0	0	Actinobacteria	Actinobacteria	Frankiales	Sporichthyaceae
OTU94	0	0	0	0	0	0	0	0	0	0	0	0	0	3	0	0	Spirochaetae	Spirochaetes	Spirochaetales	Spirochaetaceae	Spirochaeta
OTU96	1	0	3	7	10	2	1	1	3	2	0	0	0	0	0	2	Actinobacteria	Actinobacteria	Coriobacteriales	Coriobacteriaceae	Enterorhabdus	uncultured_bacterium
OTU98	0	1	0	0	0	0	0	0	5	680	0	1	785	19	149	128	Bacteroidetes	Bacteroidia	Bacteroidales	Bacteroidaceae	Bacteroides
OTU99	1	1	1	1	1	4	2	0	0	0	0	0	2	2	0	3	Bacteroidetes	Bacteroidia	Bacteroidales	Rikenellaceae	Alistipes
OTU100	1	0	0	1	2	0	0	2	0	0	0	0	0	1	0	0	Firmicutes	Clostridia	Clostridiales	Ruminococcaceae	Anaerotruncus
OTU101	21	0	1	36	22	20	9	49	4	2	1	0	11	21	2	19	Firmicutes	Clostridia	Clostridiales	Defluviitaleaceae	uncultured	uncultured_organism
OTU103	0	0	0	2	0	26	5	0	0	0	0	0	0	1	0	0	Proteobacteria	Alphaproteobacteria	Rhodospirillales	Rhodospirillaceae	Thalassospira	uncultured_rumen_bacterium
OTU104	0	0	2	4	3	9	6	0	0	0	0	0	0	1	0	0	Firmicutes	Clostridia	Clostridiales	Ruminococcaceae	uncultured	uncultured_eubacterium_WCHB1-49
OTU105	2	0	0	5	0	5	6	1	0	1	0	0	3	5	0	4	Firmicutes	Clostridia	Clostridiales	Ruminococcaceae
OTU106	0	0	0	1	2	2	0	0	0	0	0	0	0	0	0	0	Firmicutes	Clostridia	Clostridiales	Ruminococcaceae	uncultured
OTU107	0	0	0	0	0	0	0	0	0	1	0	0	21	0	1	12	Firmicutes	Clostridia	Clostridiales
OTU109	12	1	8	4	2	3	7	2	1	0	0	0	0	0	0	0	Firmicutes	Bacilli	Lactobacillales	Lactobacillaceae	Lactobacillus	Lactobacillus_vini
OTU110	0	0	0	0	0	0	0	0	0	0	0	0	0	5	0	118	Lentisphaerae	RFP12_gut_group	no rank	no rank	no rank	bacterium_enrichment_culture_clone_M136
OTU111	292	0	6	81	131	224	321	211	2	0	0	0	0	0	0	0	Bacteroidetes	Bacteroidia	Bacteroidales	Prevotellaceae
OTU112	1	0	0	3	9	5	3	13	0	0	0	0	0	3	0	0	Firmicutes	Clostridia	Clostridiales	Peptococcaceae	uncultured
OTU113	16	11	1	2	0	274	4	24	43	215	6	6	217	83	291	277	Bacteroidetes	Bacteroidia	Bacteroidales	Bacteroidaceae	Bacteroides	Bacteroides_coprocola_DSM_17136
OTU114	0	0	0	0	2	2	0	0	0	0	0	0	0	1	0	0	Firmicutes	Clostridia	Clostridiales	vadinBB60	no rank
OTU115	0	0	0	0	0	0	0	0	0	0	0	0	0	0	2	0	Deferribacteres	Deferribacteres	Deferribacterales	Deferribacteraceae	Mucispirillum
OTU116	0	4	0	0	0	0	0	0	0	0	0	0	0	0	0	0	Proteobacteria	Gammaproteobacteria	Enterobacteriales	Enterobacteriaceae	Pantoea
OTU117	26	2	0	11	8	6	13	7	0	6	0	0	8	0	1	0	Bacteroidetes	Bacteroidia	Bacteroidales	Rikenellaceae	Alistipes
OTU118	1	0	1	4	2	0	5	5	1	0	0	2	0	4	0	4	Firmicutes	Erysipelotrichia	Erysipelotrichales	Erysipelotrichaceae	uncultured
OTU119	0	12	0	1	5	5	1	4	0	0	0	0	0	0	0	0	Firmicutes	Clostridia	Clostridiales	Ruminococcaceae	uncultured	unidentified
OTU120	0	0	0	0	0	0	0	0	0	0	0	0	0	14	0	0	Firmicutes	Clostridia	Clostridiales	vadinBB60	no rank
OTU122	0	7	0	0	0	0	0	0	0	0	0	0	0	0	0	0	Firmicutes	Clostridia	Clostridiales	Lachnospiraceae	Roseburia
OTU123	1	0	1	9	12	7	6	19	0	0	0	0	0	0	0	0	Firmicutes	Clostridia	Clostridiales	Christensenellaceae	uncultured	uncultured_bacterium
OTU124	8	1	5	52	47	55	19	60	0	0	0	0	0	4	0	1	Firmicutes	Clostridia	Clostridiales	Lachnospiraceae
OTU125	2	0	0	4	6	0	2	13	0	0	0	0	6	1	0	9	Firmicutes	Clostridia	Clostridiales	Lachnospiraceae
OTU126	3	0	0	3	0	10	8	0	0	6	0	0	4	3	1	1	Bacteroidetes	Bacteroidia	Bacteroidales	Rikenellaceae	Alistipes
OTU127	34	4	0	130	11	411	112	11	64	20	1	57	19	37	116	96	Bacteroidetes	Bacteroidia	Bacteroidales	Bacteroidaceae	Bacteroides
OTU129	1	1	7	14	8	18	7	3	4	1	0	3	0	6	0	3	Firmicutes	Clostridia	Clostridiales	Christensenellaceae	uncultured
OTU131	0	0	0	0	0	0	0	0	0	0	0	8	0	0	0	0	Deinococcus-Thermus	Deinococci	Deinococcales	Trueperaceae	Truepera	uncultured_Deinococcales_bacterium
OTU132	0	0	0	0	9	3	0	3	0	0	0	0	1	1	0	4	Firmicutes	Clostridia	Clostridiales	Ruminococcaceae	uncultured
OTU133	11	483	2	15	19	21	23	9	2	2	1	0	15	44	15	17	Firmicutes	Clostridia	Clostridiales	Ruminococcaceae	uncultured
OTU134	1	0	0	4	0	1	3	0	0	0	0	0	0	0	0	0	Tenericutes	Mollicutes	Anaeroplasmatales	Anaeroplasmataceae	Anaeroplasma	uncultured_bacterium
OTU135	1	0	1	16	1	5	48	1	0	0	0	3	0	0	1	0	Proteobacteria	Alphaproteobacteria	Rhodospirillales	Rhodospirillaceae	Thalassospira	uncultured_bacterium
OTU136	0	0	0	0	0	0	0	0	1	1	16	8	0	7	4	4	Actinobacteria	Actinobacteria	Coriobacteriales	Coriobacteriaceae	Collinsella	Collinsella_sp._GD3
OTU137	0	0	1	0	0	0	0	0	12	6	0	0	0	2	6	10	Bacteroidetes	Bacteroidia	Bacteroidales	Rikenellaceae	RC9_gut_group	uncultured_bacterium
OTU138	29	4	7	126	148	137	20	28	3	0	0	0	1	43	1	4	Firmicutes	Clostridia	Clostridiales	Ruminococcaceae	uncultured
OTU139	0	28	0	0	0	0	0	0	0	0	0	0	0	0	0	0	Bacteroidetes	Bacteroidia	Bacteroidales	S24-7	no rank	uncultured_bacterium
OTU140	0	117	0	0	0	0	0	0	0	0	0	0	0	0	0	0	Bacteroidetes	Bacteroidia	Bacteroidales	Bacteroidaceae	Bacteroides
OTU141	7	0	1	0	2	0	1	0	0	0	0	0	0	1	0	0	Firmicutes	Clostridia	Clostridiales	Ruminococcaceae	Ruminococcus
OTU142	0	10	0	0	0	0	0	0	0	0	0	0	0	0	0	0	Firmicutes	Clostridia	Clostridiales	Christensenellaceae	Christensenella	Christensenella_minuta
OTU143	0	6	0	0	0	0	0	0	0	0	0	3	0	0	0	2	Firmicutes	Negativicutes	Selenomonadales	Veillonellaceae	Megasphaera	uncultured_bacterium
OTU144	0	0	0	0	0	0	0	0	27	0	0	2	4	0	3	2	Firmicutes	Erysipelotrichia	Erysipelotrichales	Erysipelotrichaceae
OTU145	0	13	0	0	0	0	0	0	0	0	0	0	0	0	0	0	Synergistetes	Synergistia	Synergistales	Synergistaceae
OTU146	0	24	0	0	1	0	0	0	1	0	0	0	2	1	2	7	Firmicutes	Clostridia	Clostridiales	Ruminococcaceae	Incertae_Sedis
OTU147	0	2	0	0	0	0	0	0	0	0	0	0	0	1	0	0	Chloroflexi	Thermomicrobia	JG30-KF-CM45	no rank	no rank
OTU149	6	5	0	14	16	12	11	27	0	0	0	0	0	11	0	5	Firmicutes	Clostridia	Clostridiales	Ruminococcaceae
OTU150	0	1	1	4	1	7	6	1	0	0	0	0	0	0	0	0	Bacteroidetes	Bacteroidia	Bacteroidales
OTU151	0	0	0	1	3	6	0	0	0	0	0	1	0	2	0	0	Firmicutes	Clostridia	Clostridiales	Ruminococcaceae	uncultured
OTU152	0	0	0	9	33	5	6	13	0	0	0	0	0	0	0	0	Firmicutes	Clostridia	Clostridiales	Peptococcaceae	uncultured
OTU153	1	4	5	0	0	0	0	0	3	0	92	6	1	0	1	0	Firmicutes	Bacilli	Lactobacillales	Enterococcaceae	Enterococcus
OTU154	0	2	0	0	0	0	0	0	0	0	0	0	0	0	0	0	Firmicutes	Clostridia	Clostridiales	Lachnospiraceae
OTU155	0	23	0	0	0	0	0	0	0	0	0	0	0	0	0	0	Synergistetes	Synergistia	Synergistales	Synergistaceae	uncultured
OTU157	924	12	20	195	114	147	310	52	17	33	3	3	7	32	2	93	Bacteroidetes	Bacteroidia	Bacteroidales	Prevotellaceae	uncultured	uncultured_organism
OTU158	0	1	0	0	0	0	0	0	0	0	0	3	0	0	0	0	Actinobacteria	Actinobacteria	Corynebacteriales	Corynebacteriaceae	uncultured
OTU159	0	0	0	0	0	0	1	0	0	0	0	0	0	0	7	8	Bacteroidetes	Bacteroidia	Bacteroidales
OTU160	7	0	2	2	4	1	1	0	20	0	5	7	0	3	1	4	Actinobacteria	Actinobacteria	Coriobacteriales	Coriobacteriaceae
OTU161	0	218	0	0	0	0	0	0	0	0	0	0	0	0	0	0	Firmicutes	Clostridia	Clostridiales	Ruminococcaceae	Ruminococcus	uncultured_Firmicutes_bacterium
OTU163	5	0	0	12	11	17	4	11	0	0	0	0	0	2	0	0	Firmicutes	Clostridia	Clostridiales	Lachnospiraceae	uncultured
OTU165	12	3	2	87	37	64	321	109	1	3	0	2	14	28	3	57	Proteobacteria	Deltaproteobacteria	Desulfovibrionales	Desulfovibrionaceae	Desulfovibrio
OTU166	0	0	0	0	0	0	0	0	0	0	0	8	0	0	13	0	Bacteroidetes	Bacteroidia	Bacteroidales	S24-7	no rank	gut_metagenome
OTU167	2	0	0	1	2	2	1	5	0	1	0	0	0	1	0	0	Firmicutes	Clostridia	Clostridiales	Ruminococcaceae	Oscillibacter
OTU168	0	305	0	0	0	0	0	0	0	0	0	0	0	0	0	0	Firmicutes	Clostridia	Clostridiales	Lachnospiraceae	Blautia
OTU170	1	0	1	20	31	31	4	37	0	0	0	0	0	0	0	0	Firmicutes	Clostridia	Clostridiales	Ruminococcaceae	uncultured
OTU171	1	0	0	0	0	0	0	0	2	0	0	0	0	0	0	0	Candidate_division_TM7	no rank	no rank	no rank	no rank	uncultured_bacterium
OTU172	0	0	0	0	0	0	0	0	0	2	0	0	26	0	0	0	Tenericutes	Mollicutes	RF9	no rank	no rank
OTU174	1	0	1	1	8	4	5	18	0	0	0	0	0	0	0	4	Firmicutes	Clostridia	Clostridiales	Ruminococcaceae
OTU175	90	3	51	21	14	20	13	4	177	105	0	13	40	0	19	4	Firmicutes	Erysipelotrichia	Erysipelotrichales	Erysipelotrichaceae	Incertae_Sedis	[Clostridium]_spiroforme
OTU176	108	2	8	16	58	6	16	13	64	12	33	33	0	10	4	6	Actinobacteria	Actinobacteria	Coriobacteriales	Coriobacteriaceae	Olsenella
OTU177	0	0	0	0	0	0	0	0	0	0	0	0	0	7	0	0	Proteobacteria	Gammaproteobacteria
OTU179	0	0	0	0	0	0	3	0	0	0	0	0	0	0	0	0	Bacteroidetes	Bacteroidia	Bacteroidales	Rikenellaceae	Alistipes
OTU180	0	0	1	0	0	0	0	0	2	69	0	0	166	8	66	88	Bacteroidetes	Bacteroidia	Bacteroidales	S24-7	no rank
OTU181	54	0	5	103	96	26	63	286	32	23	4	7	86	24	14	13	Firmicutes	Clostridia	Clostridiales	Defluviitaleaceae	Incertae_Sedis
OTU182	10	2	3	19	3	14	16	6	1	1	0	0	1	9	0	12	Bacteroidetes	Bacteroidia	Bacteroidales	Rikenellaceae	RC9_gut_group	uncultured_bacterium
OTU183	9	1	1	38	35	42	30	83	2	2	0	1	12	31	4	8	Firmicutes	Clostridia	Clostridiales	Defluviitaleaceae	uncultured
OTU184	6	0	0	11	14	6	13	27	0	0	0	0	0	10	0	7	Firmicutes	Clostridia	Clostridiales	Ruminococcaceae	uncultured
OTU185	57	0	2	14	3	90	24	4	7	0	2	1	1	54	36	57	Bacteroidetes	Bacteroidia	Bacteroidales	Porphyromonadaceae	Barnesiella	Barnesiella_viscericola_DSM_18177
OTU186	1	0	0	3	0	24	1	0	0	0	0	1	0	0	0	0	Firmicutes	Clostridia	Clostridiales	Ruminococcaceae	uncultured	unidentified_rumen_bacterium_JW32
OTU187	2	0	2	7	12	0	4	0	5	0	0	0	0	1	0	1	Firmicutes	Erysipelotrichia	Erysipelotrichales	Erysipelotrichaceae	uncultured
OTU188	10	20	52	0	0	0	0	0	27	0	8	24	0	0	0	0	Proteobacteria	Gammaproteobacteria	Pseudomonadales	Pseudomonadaceae	Pseudomonas	Pseudomonas_azotoformans
OTU189	1	0	0	0	0	0	0	0	0	0	0	0	0	2	0	2	Firmicutes	Erysipelotrichia	Erysipelotrichales	Erysipelotrichaceae	uncultured	uncultured_bacterium
OTU190	0	25	0	0	0	0	0	0	0	0	0	0	0	0	0	0	Bacteroidetes	Bacteroidia	Bacteroidales	Porphyromonadaceae	Parabacteroides	uncultured_organism
OTU191	0	7	0	0	0	0	0	0	0	0	0	0	0	0	0	0	Firmicutes	Clostridia	Clostridiales	Lachnospiraceae	uncultured	uncultured_bacterium
OTU192	918	8	73	309	207	209	171	360	2151	57	5	10	1321	113	2685	387	Firmicutes	Clostridia	Clostridiales	Ruminococcaceae	uncultured	Clostridiales_bacterium_24-4c
OTU193	0	0	0	0	1	6	0	0	0	0	0	0	0	0	0	0	Firmicutes	Clostridia	Clostridiales	vadinBB60	no rank	uncultured_bacterium
OTU194	0	0	0	0	0	0	0	0	2	0	0	0	0	4	0	1	Firmicutes	Clostridia	Clostridiales	Family_XIII	Mogibacterium	uncultured_bacterium
OTU195	113	0	34	50	341	45	44	141	44	188	4	3	321	34	807	190	Firmicutes	Clostridia	Clostridiales	Ruminococcaceae	uncultured	bacterium_ic1340
OTU196	0	1	0	11	0	4	21	6	0	1	0	1	0	0	0	2	Proteobacteria	Betaproteobacteria	Burkholderiales	Alcaligenaceae	Sutterella	uncultured_bacterium
OTU198	0	0	0	0	0	0	0	0	0	0	0	0	0	6	0	12	Bacteroidetes	Bacteroidia	Bacteroidales
OTU199	0	2	0	0	0	0	0	0	0	0	28	35	0	0	0	0	Firmicutes	Clostridia	Clostridiales	Clostridiaceae_1	Clostridium_sensu_stricto_13
OTU200	11	0	238	0	0	4	2	0	0	0	3	0	0	0	1	0	Proteobacteria	Epsilonproteobacteria	Campylobacterales	Campylobacteraceae	Campylobacter	Campylobacter_jejuni
OTU201	0	0	0	1	1	1	0	2	0	0	0	0	0	0	0	0	Firmicutes	Clostridia	Clostridiales	Ruminococcaceae	Anaerotruncus	uncultured_rumen_bacterium
OTU203	63	6	12	233	57	190	60	94	126	13	13	11	8	52	12	48	Firmicutes	Clostridia	Clostridiales	Ruminococcaceae	Subdoligranulum
OTU205	2	1	0	0	0	0	1	0	1	0	0	4	18	0	0	0	Firmicutes	Negativicutes	Selenomonadales	Veillonellaceae	Veillonella
OTU206	0	0	1	6	3	5	26	2	0	0	0	0	0	0	0	0	Firmicutes	Clostridia	Thermoanaerobacterales	Thermoanaerobacteraceae	Gelria	unidentified
OTU207	1	0	0	1	5	0	1	3	0	0	0	0	0	0	0	0	Firmicutes	Clostridia	Clostridiales	Ruminococcaceae	Anaerotruncus
OTU208	16	0	2	14	13	19	6	11	0	0	0	0	0	0	0	1	Firmicutes	Clostridia	Clostridiales	Ruminococcaceae	Incertae_Sedis	uncultured_Clostridia_bacterium
OTU209	1	0	1	1	0	1	1	3	3	0	0	0	2	2	2	4	Firmicutes	Clostridia	Clostridiales	Ruminococcaceae	Incertae_Sedis
OTU210	215	21	2	208	19	228	815	27	54	13	11	14	4	126	34	231	Bacteroidetes	Bacteroidia	Bacteroidales	Bacteroidaceae	Bacteroides	uncultured_bacterium
OTU212	0	0	0	0	0	0	2	0	0	0	0	0	0	0	0	1	Firmicutes	Clostridia	Clostridiales	vadinBB60	no rank
OTU213	1	1	0	44	0	0	0	0	10	39	126	3	5089	17	877	50	Fusobacteria	Fusobacteriia	Fusobacteriales	Fusobacteriaceae	Fusobacterium	Fusobacterium_mortiferum
OTU214	2	0	0	4	9	11	11	4	0	0	0	0	0	0	0	0	Firmicutes	Clostridia	Clostridiales	Ruminococcaceae	uncultured
OTU216	0	0	0	0	0	0	0	0	2	0	0	0	0	2	2	2	Spirochaetae	Spirochaetes	Spirochaetales	Spirochaetaceae	Treponema
OTU217	1	0	2	1	0	2	9	0	1	7	0	0	21	13	32	6	Proteobacteria	Betaproteobacteria	Burkholderiales	Alcaligenaceae	Sutterella
OTU218	0	0	0	0	0	0	0	0	10	1	0	6	1	7	1	19	Bacteroidetes	Bacteroidia	Bacteroidales	Prevotellaceae	uncultured	uncultured_Prevotellaceae_bacterium
OTU220	10	0	47	0	0	0	0	0	0	0	1	11	0	0	0	0	Firmicutes	Clostridia	Clostridiales	Lachnospiraceae	Cellulosilyticum	uncultured_bacterium
OTU221	0	1	0	0	0	0	0	0	1	14	1	0	52	92	16	36	Bacteroidetes	Bacteroidia	Bacteroidales
OTU222	0	0	0	2	1	1	2	2	0	0	0	0	0	0	0	0	Firmicutes	Clostridia	Clostridiales	Ruminococcaceae	uncultured
OTU223	0	0	0	1	0	12	1	1	0	0	0	1	1	0	0	0	Tenericutes	Mollicutes	RF9	no rank	no rank	uncultured_bacterium
OTU225	2	0	0	5	2	5	4	5	0	0	0	0	0	0	0	0	Firmicutes	Clostridia	Clostridiales	Lachnospiraceae	uncultured
OTU226	0	0	0	5	0	2	5	11	0	0	0	0	0	0	0	0	Firmicutes	Clostridia	Clostridiales
OTU227	0	0	0	0	0	0	0	0	0	2	0	0	0	0	0	0	Proteobacteria	Betaproteobacteria	Burkholderiales	Alcaligenaceae	uncultured	uncultured_rumen_bacterium
OTU228	0	7	0	0	0	0	0	0	0	0	0	0	0	0	0	0	Bacteroidetes	Bacteroidia	Bacteroidales	S24-7	no rank	uncultured_Bacteroidales_bacterium
OTU229	305	10	36	394	257	485	274	843	6	0	2	4	3	105	2	43	Firmicutes	Clostridia	Clostridiales	Ruminococcaceae	uncultured
OTU230	0	0	0	2	1	6	0	0	0	0	0	0	0	1	0	0	Firmicutes	Clostridia	Clostridiales	Ruminococcaceae	Hydrogenoanaerobacterium	uncultured_Clostridiaceae_bacterium
OTU231	137	4	1	116	17	46	392	7	0	0	0	0	0	0	0	0	Bacteroidetes	Bacteroidia	Bacteroidales	Bacteroidaceae	Bacteroides
OTU232	0	111	0	1	0	0	0	1	0	0	0	0	0	0	0	0	Firmicutes	Clostridia	Clostridiales	Ruminococcaceae	Oscillibacter	uncultured_bacterium
OTU233	0	5585	0	0	0	0	0	0	3	27	0	8	361	76	107	559	Proteobacteria	Deltaproteobacteria	Desulfovibrionales	Desulfovibrionaceae	Desulfovibrio	uncultured_bacterium
OTU234	0	2	0	0	0	0	0	0	0	0	0	0	0	0	0	0	Gemmatimonadetes	Gemmatimonadetes	Gemmatimonadales	Gemmatimonadaceae	uncultured
OTU235	0	0	0	0	0	0	0	0	30	34	1	0	1	0	1	2	Actinobacteria	Actinobacteria	Coriobacteriales	Coriobacteriaceae	Collinsella	uncultured_bacterium
OTU236	3	0	5	6	1	3	6	5	0	0	0	1	0	0	0	0	Firmicutes	Bacilli	Lactobacillales	Lactobacillaceae	Lactobacillus	Lactobacillus_plantarum_subsp._plantarum
OTU237	307	40	1304	12	1	0	1	3	13	3	1792	247	16	2	0	0	Firmicutes	Clostridia	Clostridiales	Clostridiaceae_1	Clostridium_sensu_stricto_1	uncultured_bacterium
OTU238	0	0	0	0	0	0	0	0	0	19	0	0	2	0	0	0	Firmicutes	Bacilli	Lactobacillales	Lactobacillaceae	Lactobacillus
OTU239	0	0	0	0	0	0	0	1	1	0	0	0	1	6	1	1	Firmicutes	Clostridia	Clostridiales	Christensenellaceae	uncultured	bacterium_YE57
OTU240	3	2	1	3	3	5	6	2	1	1	1	4	0	1	0	0	Actinobacteria	Actinobacteria	Coriobacteriales	Coriobacteriaceae
OTU242	7	0	6	90	19	0	161	26	6	94	2	8	45	13	123	66	Bacteroidetes	Bacteroidia	Bacteroidales	Bacteroidaceae	Bacteroides	Bacteroides_coprophilus
OTU243	0	0	1	0	0	0	0	0	0	0	0	0	0	0	0	1	Firmicutes	Bacilli	Bacillales	Staphylococcaceae	Staphylococcus	Staphylococcus_sciuri
OTU245	0	1	0	0	0	0	0	0	0	0	0	2	0	9	0	0	Firmicutes	Clostridia	Clostridiales	Lachnospiraceae	Oribacterium	uncultured_rumen_bacterium
OTU246	1	0	0	6	5	6	5	9	0	0	0	0	0	0	0	0	Firmicutes	Clostridia	Clostridiales	Christensenellaceae	uncultured	bacterium_enrichment_culture_clone_RB7c
OTU247	7	5	0	0	0	0	0	2	1	0	5	4	0	0	0	0	Proteobacteria	Alphaproteobacteria	Sphingomonadales	Sphingomonadaceae	Sphingomonas
OTU248	164	0	1	3	2	0	0	0	13	834	3	13	325	2	133	11	Firmicutes	Clostridia	Clostridiales	Lachnospiraceae
OTU249	2	0	0	6	15	6	1	6	9	0	0	1	0	4	3	1	Firmicutes	Clostridia	Clostridiales	Ruminococcaceae
OTU250	1	3	0	2	7	4	2	5	0	0	1	1	0	0	0	2	Firmicutes	Clostridia	Clostridiales	Family_XIII
OTU252	0	193	0	0	0	0	0	0	0	0	0	0	0	0	0	0	Firmicutes	Clostridia	Clostridiales	Lachnospiraceae
OTU254	0	0	0	50	0	0	0	0	0	8	91	0	162	2	145	26	Fusobacteria	Fusobacteriia	Fusobacteriales
OTU255	4	33	68	0	0	0	0	0	47	1	3	45	0	0	0	1	Firmicutes	Bacilli	Lactobacillales	Carnobacteriaceae	Carnobacterium	Carnobacterium_maltaromaticum
OTU256	1	0	2	22	10	0	6	33	114	5	3	6	7	6	18	7	Firmicutes	Erysipelotrichia	Erysipelotrichales	Erysipelotrichaceae	uncultured
OTU257	0	0	0	0	0	0	0	0	0	0	33	7	0	6	24	0	Proteobacteria	Alphaproteobacteria	Rickettsiales	mitochondria	no rank	uncultured_alpha_proteobacterium
OTU258	3	0	0	0	1	0	2	0	16	3	0	0	0	0	1	0	Actinobacteria	Actinobacteria	Coriobacteriales	Coriobacteriaceae	Slackia	Slackia_equolifaciens
OTU259	3	2	0	14	1	0	28	0	2	14	0	9	11	6	4	19	Proteobacteria	Betaproteobacteria	Burkholderiales	Alcaligenaceae	Sutterella	uncultured_bacterium
OTU260	0	31	0	0	0	0	0	0	0	0	0	0	0	0	0	0	Firmicutes	Bacilli	Bacillales	Bacillaceae	Bacillus	Bacillus_thermoamylovorans
OTU262	12	0	4	2	2	0	0	3	11	0	2	24	0	4	4	1	Actinobacteria	Actinobacteria	Coriobacteriales	Coriobacteriaceae	Slackia	uncultured_bacterium
OTU263	1	2	1	0	0	0	0	1	0	1	0	0	0	0	0	0	Actinobacteria	Actinobacteria	Bifidobacteriales	Bifidobacteriaceae	Bifidobacterium
OTU264	0	1	0	0	0	54	0	0	0	0	0	1	0	2	0	0	Firmicutes	Erysipelotrichia	Erysipelotrichales	Erysipelotrichaceae	uncultured	uncultured_bacterium
OTU265	29	4	0	0	0	1	0	1	1	4	0	0	6	8	1	47	Bacteroidetes	Bacteroidia	Bacteroidales
OTU266	1	1	0	0	0	0	5	0	1	0	1	22	0	35	4	15	Bacteroidetes	Bacteroidia	Bacteroidales	Bacteroidaceae	Bacteroides
OTU267	0	0	0	0	0	0	0	0	0	16	0	0	7	0	0	0	Firmicutes	Erysipelotrichia	Erysipelotrichales	Erysipelotrichaceae	uncultured
OTU268	12	1	1	7	72	30	1	64	0	5	1	0	34	14	16	19	Firmicutes	Clostridia	Clostridiales	Lachnospiraceae
OTU269	3	9	0	33	5	174	43	17	0	0	1	0	0	2	0	0	Firmicutes	Clostridia	Clostridiales	Ruminococcaceae	Incertae_Sedis	Clostridiales_bacterium_DJF_B152
OTU270	6	1	5	4	6	22	0	3	0	0	0	0	0	1	0	0	Firmicutes	Clostridia	Clostridiales	Lachnospiraceae	Marvinbryantia	uncultured_organism
OTU271	0	0	0	0	0	0	0	1	0	3	0	0	1	1	2	1	Firmicutes	Clostridia	Clostridiales	vadinBB60	no rank	uncultured_bacterium
OTU272	378	0	26	1	6	10	3	2	2	30	0	1	34	0	0	0	Firmicutes	Erysipelotrichia	Erysipelotrichales	Erysipelotrichaceae	Incertae_Sedis	bacterium_ic1391
OTU273	5	1	7	101	2	39	101	20	88	11	4	4	9	2	3	1	Firmicutes	Erysipelotrichia	Erysipelotrichales	Erysipelotrichaceae	uncultured
OTU276	0	0	0	0	0	0	0	0	0	9	0	0	8	0	0	0	Proteobacteria	Betaproteobacteria	Burkholderiales	Alcaligenaceae	Sutterella
OTU277	2	0	2	11	30	8	5	4	0	0	0	0	0	0	0	0	Firmicutes	Clostridia	Clostridiales	Ruminococcaceae	Incertae_Sedis	Ruminococcus_sp._16442
OTU278	1	0	0	12	2	19	2	0	1	2	1	0	7	2	0	3	Firmicutes	Clostridia	Clostridiales	Ruminococcaceae	uncultured
OTU279	0	1	0	0	3	1	4	0	0	0	0	3	0	20	4	4	Firmicutes	Clostridia	Clostridiales	vadinBB60	no rank	uncultured_bacterium
OTU280	6	0	0	1	0	0	2	1	0	0	0	0	1	0	0	2	Cyanobacteria	Cyanobacteria	Gastranaerophilales	no rank	no rank	uncultured_bacterium
OTU281	0	18	0	0	0	0	0	0	0	0	0	0	0	0	0	0	Firmicutes	Clostridia	Clostridiales	Christensenellaceae
OTU282	0	0	0	0	0	0	0	0	2	9	0	0	2	0	57	6	Tenericutes	Mollicutes	Anaeroplasmatales	Anaeroplasmataceae	Anaeroplasma	gut_metagenome
OTU283	140	0	6	0	59	60	0	35	54	82	7	20	93	141	297	384	Bacteroidetes	Bacteroidia	Bacteroidales	Prevotellaceae	uncultured	uncultured_bacterium
OTU285	2	0	0	0	0	5	11	1	0	0	0	0	0	2	0	0	Firmicutes	Clostridia	Clostridiales	Ruminococcaceae
OTU286	11	0	2	39	17	10	47	2	0	0	0	0	0	9	2	12	Elusimicrobia	Elusimicrobia	Elusimicrobiales	Elusimicrobiaceae	Elusimicrobium	uncultured_bacterium
OTU287	4	2	1	7	9	3	1	0	0	0	0	0	0	0	0	0	Firmicutes	Clostridia	Clostridiales	Lachnospiraceae
OTU288	0	0	1	5	7	3	2	6	0	0	0	0	0	0	0	0	Firmicutes	Clostridia	Clostridiales	Ruminococcaceae
OTU289	0	0	0	0	0	0	0	0	0	0	0	2	0	0	0	0	Firmicutes	Bacilli	Lactobacillales	Carnobacteriaceae	Trichococcus
OTU290	185	0	4	38	3	150	51	11	0	0	0	1	0	0	0	0	Firmicutes	Clostridia	Clostridiales	Ruminococcaceae	Incertae_Sedis	Clostridiales_bacterium_NK3B98
OTU291	0	0	0	0	0	1	1	5	0	0	0	0	0	1	0	0	Firmicutes	Clostridia	Clostridiales	Ruminococcaceae	uncultured
OTU293	8	0	0	5	0	0	10	0	0	0	0	0	0	2	0	0	Bacteroidetes	Bacteroidia	Bacteroidales	Prevotellaceae
OTU294	0	1	0	10	1	23	0	4	0	0	0	0	0	0	0	5	Firmicutes	Clostridia	Clostridiales	Ruminococcaceae	uncultured	unidentified_rumen_bacterium_RFN25
OTU295	7	0	5	32	69	40	22	87	28	3	1	6	7	12	0	12	Firmicutes	Clostridia	Clostridiales	Ruminococcaceae
OTU296	10	0	0	20	3	20	33	6	0	0	0	0	0	2	0	0	Bacteroidetes	Bacteroidia	Bacteroidales	Rikenellaceae	Alistipes
OTU297	0	0	0	0	0	0	0	0	2	37	1	2	28	2	15	2	Proteobacteria	Betaproteobacteria	Burkholderiales	Alcaligenaceae	Sutterella
OTU298	6	20	57	0	0	0	0	0	28	0	3	24	3	0	0	1	Firmicutes	Bacilli	Lactobacillales	Streptococcaceae	Streptococcus	Streptococcus_salivarius_subsp._thermophilus
OTU299	309	6	3	0	0	0	0	0	335	273	6	9	553	25	485	532	Bacteroidetes	Bacteroidia	Bacteroidales	Prevotellaceae	uncultured	uncultured_bacterium
OTU300	1	0	0	4	0	5	0	1	0	0	0	0	0	3	0	0	Firmicutes	Clostridia	Clostridiales	Defluviitaleaceae
OTU301	26	12	10	252	118	570	93	122	11	3	7	0	7	0	0	15	Firmicutes	Clostridia	Clostridiales	Ruminococcaceae	uncultured
OTU302	1	20	38	0	0	0	0	0	28	1	24	37	0	0	0	0	Firmicutes	Bacilli	Bacillales	Planococcaceae	Sporosarcina
OTU303	11	0	3	37	74	25	19	61	4	4	0	2	6	14	0	3	Firmicutes	Clostridia	Clostridiales	Family_XIII	Incertae_Sedis
OTU304	0	67	0	0	0	0	0	0	0	0	0	0	0	0	0	0	Bacteroidetes	Bacteroidia	Bacteroidales	Porphyromonadaceae	Proteiniphilum	uncultured_bacterium
OTU305	17	0	9	176	91	33	179	4	12	2	0	6	0	0	81	2	Bacteroidetes	Bacteroidia	Bacteroidales	Bacteroidaceae	Bacteroides	uncultured_Bacteroidales_bacterium
OTU306	0	5	3	0	0	0	0	0	1	0	0	1	0	0	0	0	Bacteroidetes	Bacteroidia	Bacteroidales	Prevotellaceae	Alloprevotella	uncultured_bacterium
OTU307	23	0	1	4	7	26	5	3	1	1	0	0	0	0	3	0	Bacteroidetes	Bacteroidia	Bacteroidales	Porphyromonadaceae	Barnesiella	Barnesiella_viscericola_DSM_18177
OTU308	0	1	0	0	0	0	0	0	0	0	0	1	0	0	0	0	Candidate_division_TM7	no rank	no rank	no rank	no rank	uncultured_bacterium
OTU309	168	1861	3539	1	2	2	2	1	2533	26	146	1712	0	1	0	0	Firmicutes	Bacilli	Lactobacillales	Streptococcaceae	Lactococcus	Lactococcus_piscium
OTU310	9	4	9	45	27	174	6	16	4	0	0	0	3	7	0	26	Firmicutes	Clostridia	Clostridiales	Ruminococcaceae	uncultured
OTU311	24	0	10	9	8	28	6	7	153	23	0	1	28	0	5	0	Firmicutes	Erysipelotrichia	Erysipelotrichales	Erysipelotrichaceae	uncultured
OTU313	2	1	0	8	1	4	3	0	0	0	0	1	0	1	0	1	Firmicutes	Clostridia	Clostridiales	Lachnospiraceae	Blautia
OTU314	2	1	2	2	0	1	2	1	8	5	2	0	0	2	0	0	Firmicutes	Clostridia	Clostridiales	Eubacteriaceae	Anaerofustis	Anaerofustis_stercorihominis_DSM_17244
OTU315	0	0	0	0	0	0	0	0	3	1	0	0	0	0	0	0	Firmicutes	Clostridia	Clostridiales	Peptococcaceae	Peptococcus	Peptococcus_niger
OTU316	0	0	0	0	0	0	0	0	0	3	0	0	12	0	0	2	Firmicutes	Clostridia	Clostridiales	Lachnospiraceae	Coprococcus
OTU317	0	25	0	0	0	0	0	0	0	0	0	0	0	0	0	0	Firmicutes	Clostridia	Clostridiales	Ruminococcaceae	uncultured
OTU318	0	315	0	0	0	0	0	0	0	0	0	0	0	0	0	0	Firmicutes	Clostridia	Clostridiales	Clostridiaceae_1	Fonticella	uncultured_compost_bacterium
OTU319	0	0	0	0	0	0	0	0	19	0	0	99	0	0	0	0	Firmicutes	Bacilli	Bacillales	Paenibacillaceae	Paenibacillus	Paenibacillus_phyllosphaerae
OTU320	0	48	0	1	0	0	0	22	0	0	0	0	0	0	0	0	Firmicutes	Clostridia	Clostridiales	Lachnospiraceae	Pseudobutyrivibrio
OTU321	2	0	1	0	15	3	0	1	0	0	0	0	0	0	0	0	Firmicutes	Clostridia	Clostridiales	Defluviitaleaceae	Incertae_Sedis
OTU322	74	2	13	9	11	7	7	5	191	273	14	13	81	27	10	28	Firmicutes	Clostridia	Clostridiales	Peptococcaceae	Peptococcus	uncultured_bacterium
OTU323	0	0	0	0	0	0	0	0	9	7	2	0	33	6	74	9	Proteobacteria	Gammaproteobacteria	Aeromonadales	Succinivibrionaceae	Anaerobiospirillum	Anaerobiospirillum_succiniciproducens
OTU324	0	91	0	0	0	0	0	0	0	0	0	0	0	0	0	0	Firmicutes	Clostridia	Clostridiales	Lachnospiraceae	Blautia
OTU325	4	0	0	6	16	24	1	7	0	0	0	1	0	0	0	1	Firmicutes	Clostridia	Clostridiales	Ruminococcaceae
OTU326	119	1	5	59	37	26	76	11	7	5	1	14	24	139	48	81	Bacteroidetes	Bacteroidia	Bacteroidales	Porphyromonadaceae	Parabacteroides	uncultured_bacterium
OTU327	14	3	14	3	3	26	3	1	1	1	0	0	0	0	0	0	Firmicutes	Clostridia	Clostridiales	Lachnospiraceae	Incertae_Sedis
OTU328	96	6	18	277	44	186	256	122	16	13	7	11	53	44	57	108	Firmicutes	Clostridia	Clostridiales	Ruminococcaceae	uncultured	uncultured_prokaryote
OTU329	0	0	1	3	1	4	5	4	0	0	0	0	0	1	0	1	Firmicutes	Clostridia	Clostridiales	Ruminococcaceae	uncultured
OTU330	4	0	0	2	2	0	1	3	0	0	0	0	0	2	1	3	Firmicutes	Clostridia	Clostridiales	Ruminococcaceae	Anaerotruncus	uncultured_bacterium
OTU331	0	0	0	2	0	0	5	0	0	0	0	0	0	0	0	0	Firmicutes	Erysipelotrichia	Erysipelotrichales	Erysipelotrichaceae	uncultured	uncultured_bacterium
OTU332	9	0	0	72	16	93	29	29	0	0	0	2	5	13	1	5	Firmicutes	Clostridia	Clostridiales	Ruminococcaceae	Incertae_Sedis
OTU333	0	0	0	3	0	7	5	8	0	6	0	0	3	0	1	4	Proteobacteria	Alphaproteobacteria	Rhodospirillales	Rhodospirillaceae	Thalassospira	uncultured_Kopriimonas_sp.
OTU334	0	0	0	10	9	5	2	8	0	0	0	0	1	6	0	4	Firmicutes	Clostridia	Clostridiales	Family_XIII	uncultured	uncultured_bacterium
OTU336	0	161	0	0	0	0	0	0	0	0	0	0	0	0	0	0	Bacteroidetes	Bacteroidia	Bacteroidales	Rikenellaceae	S50_wastewater-sludge_group	uncultured_bacterium
OTU337	0	0	0	0	0	0	0	0	0	0	0	2	0	0	0	0	Proteobacteria	Betaproteobacteria	Burkholderiales	Comamonadaceae	Simplicispira	Simplicispira_psychrophila
OTU338	0	17	0	0	0	0	0	0	0	0	0	0	0	0	0	0	Firmicutes	Clostridia	Clostridiales	Lachnospiraceae	uncultured
OTU339	19	0	1	12	16	46	12	17	18	68	2	8	183	40	426	56	Bacteroidetes	Bacteroidia	Bacteroidales	S24-7	no rank
OTU340	0	0	0	0	0	0	0	0	2	0	7	9	0	2	0	1	Firmicutes	Bacilli	Bacillales	Staphylococcaceae	Jeotgalicoccus
OTU341	0	72	0	0	0	0	0	0	0	0	0	0	0	0	0	0	Spirochaetae	Spirochaetes	Spirochaetales	Spirochaetaceae	uncultured	uncultured_bacterium
OTU342	6	6	0	0	1	71	3	1	2	0	0	1	0	0	0	0	Bacteroidetes	Bacteroidia	Bacteroidales	Bacteroidaceae	Bacteroides	Bacteroides_salanitronis_DSM_18170
OTU344	0	1	0	7	3	40	32	1	0	0	0	0	0	0	0	0	Bacteroidetes	Bacteroidia	Bacteroidales
OTU345	0	1	1	0	0	0	0	0	0	1	0	9	0	0	0	0	Actinobacteria	Actinobacteria	Corynebacteriales	Corynebacteriaceae	Corynebacterium	Corynebacterium_freneyi
OTU346	0	0	0	0	0	0	0	0	1	27	1	0	0	0	0	0	Proteobacteria	Gammaproteobacteria	Pasteurellales	Pasteurellaceae	uncultured	Bisgaard_Taxon_44
OTU347	29	0	2	29	98	24	34	154	0	3	0	0	9	1	0	3	Firmicutes	Clostridia	Clostridiales	Ruminococcaceae
OTU348	0	0	0	0	0	0	2	3	0	0	0	0	0	0	0	0	Firmicutes	Clostridia	Clostridiales	Ruminococcaceae	Incertae_Sedis
OTU350	1	1	0	0	0	0	0	0	0	0	0	0	0	0	0	0	Bacteroidetes	Flavobacteriia	Flavobacteriales	Flavobacteriaceae	Tenacibaculum
OTU352	16	0	1	29	78	56	44	89	0	1	2	1	0	29	2	17	Firmicutes	Clostridia	Clostridiales	Ruminococcaceae
OTU353	0	0	0	0	0	0	0	0	2	0	4	2	0	2	2	0	Proteobacteria	Deltaproteobacteria	Desulfovibrionales	Desulfovibrionaceae	Desulfovibrio
OTU354	26	1	2	26	3	10	8	4	1	0	0	0	0	0	0	0	Firmicutes	Clostridia	Clostridiales	Lachnospiraceae	Blautia
OTU355	0	0	0	10	1	22	27	3	0	0	0	0	0	37	1	11	Bacteroidetes	Bacteroidia	Bacteroidales	Prevotellaceae
OTU356	11	0	0	0	0	0	0	0	0	0	0	5	0	0	0	0	Bacteroidetes	Sphingobacteriia	Sphingobacteriales	Sphingobacteriaceae	Pedobacter	Pedobacter_duraquae
OTU357	15	0	3	3	3	9	26	0	0	0	0	0	1	2	1	0	Firmicutes	Clostridia	Clostridiales	Ruminococcaceae	Incertae_Sedis	uncultured_organism
OTU358	15	0	2	50	11	12	18	50	6	3	4	13	1	5	2	11	Firmicutes	Clostridia	Clostridiales	Christensenellaceae	uncultured	uncultured_prokaryote
OTU359	1	0	7	0	0	1	0	0	0	0	94	2	0	0	0	1	Firmicutes	Clostridia	Clostridiales	Lachnospiraceae	Epulopiscium
OTU360	51	0	3	6	138	0	0	3	2	3	0	0	1	0	2	0	Firmicutes	Clostridia	Clostridiales	Ruminococcaceae	uncultured
OTU361	0	0	0	0	0	9	0	0	1	0	0	0	0	1	0	2	Proteobacteria	Alphaproteobacteria	Rhodospirillales	Rhodospirillaceae	Thalassospira
OTU362	2	0	3	97	13	51	16	33	0	0	1	0	0	2	0	2	Firmicutes	Clostridia	Clostridiales	Ruminococcaceae	uncultured
OTU363	1	0	0	6	1	0	12	0	0	0	0	0	1	16	1	4	Bacteroidetes	Bacteroidia	Bacteroidales
OTU364	6	21	40	0	0	0	0	0	30	1	4	19	0	0	0	0	Proteobacteria	Gammaproteobacteria	Pseudomonadales	Pseudomonadaceae	Pseudomonas	Pseudomonas_fragi
OTU365	0	5	2	16	13	9	0	7	0	0	1	0	0	0	0	0	Firmicutes	Clostridia	Clostridiales	Lachnospiraceae
OTU366	134	4	15	177	431	100	35	308	93	72	5	2	150	33	58	74	Firmicutes	Clostridia	Clostridiales	Ruminococcaceae	Anaerotruncus	uncultured_organism
OTU367	0	16	0	0	0	0	0	0	0	0	0	0	0	0	0	0	Firmicutes	Clostridia	Clostridiales	Ruminococcaceae	Incertae_Sedis
OTU368	135	7	34	138	133	0	369	29	0	0	0	0	0	10	0	5	Bacteroidetes	Bacteroidia	Bacteroidales	Prevotellaceae	uncultured	uncultured_bacterium
OTU370	7	1	2	32	0	21	12	0	0	0	0	1	2	0	0	0	Firmicutes	Clostridia	Clostridiales	Lachnospiraceae
OTU371	0	0	0	0	0	0	0	0	0	0	0	0	0	2	0	6	Firmicutes	Clostridia	Clostridiales	vadinBB60	no rank	uncultured_bacterium
OTU372	0	18	0	0	0	0	0	0	0	0	0	0	0	0	0	0	Firmicutes	Negativicutes	Selenomonadales	Veillonellaceae	uncultured	bacterium_enrichment_culture_clone_LA29
OTU373	2	0	0	0	0	0	0	0	0	0	7	0	0	0	0	0	Proteobacteria	Betaproteobacteria	Burkholderiales	Burkholderiaceae	Burkholderia
OTU374	0	387	0	0	0	0	0	0	0	0	0	0	0	0	0	0	Firmicutes	Clostridia	Clostridiales	Ruminococcaceae	uncultured
OTU375	1	2	7	0	4	6	1	0	1	0	2	0	0	1	0	0	Firmicutes	Erysipelotrichia	Erysipelotrichales	Erysipelotrichaceae	uncultured
OTU376	0	0	0	7	12	6	2	15	0	0	0	0	0	0	0	0	Firmicutes	Clostridia	Clostridiales	Ruminococcaceae	uncultured
OTU377	4	0	0	0	0	0	0	0	0	0	11	0	0	0	0	0	Proteobacteria	Gammaproteobacteria	Pasteurellales	Pasteurellaceae	Gallibacterium	Gallibacterium_anatis
OTU378	0	0	0	0	0	6	0	1	0	0	0	0	0	0	0	0	Tenericutes	Mollicutes	RF9	no rank	no rank
OTU379	0	2	0	5	12	8	10	10	0	0	0	0	0	0	0	0	Firmicutes	Clostridia	Clostridiales	Christensenellaceae	uncultured	uncultured_bacterium
OTU380	0	0	0	0	0	0	0	0	3	0	0	1	0	0	0	0	Proteobacteria	Alphaproteobacteria	Rhodobacterales	Rhodobacteraceae	Rubellimicrobium	uncultured_bacterium
OTU381	0	265	0	0	0	0	0	0	0	0	0	0	0	0	0	0	Firmicutes	Clostridia	Clostridiales	Ruminococcaceae	uncultured	Clostridium_leptum
OTU382	5	3	1	7	8	8	3	12	0	0	1	0	0	9	0	0	Firmicutes	Clostridia	Clostridiales	Lachnospiraceae
OTU383	0	0	0	0	0	0	0	0	8	5	0	6	0	0	0	0	Bacteroidetes	Bacteroidia	Bacteroidales	Porphyromonadaceae	Porphyromonas
OTU384	9	34	4	166	29	227	499	4	4	0	0	1	0	0	0	0	Bacteroidetes	Bacteroidia	Bacteroidales	Bacteroidaceae	Bacteroides	uncultured_Bacteroidales_bacterium
OTU385	3	0	2	11	8	8	12	5	0	0	0	0	0	1	1	2	Firmicutes	Clostridia	Clostridiales	Ruminococcaceae	Anaerotruncus
OTU386	39	17	29	988	160	235	358	81	2	0	3	9	0	68	0	26	Firmicutes	Negativicutes	Selenomonadales	Acidaminococcaceae	Phascolarctobacterium	uncultured_Firmicutes_bacterium
OTU387	0	0	0	0	0	0	0	0	0	3	0	0	21	0	13	6	Bacteroidetes	Bacteroidia	Bacteroidales	Rikenellaceae	RC9_gut_group	uncultured_bacterium
OTU388	0	321	0	0	0	0	0	0	0	0	0	0	0	0	0	0	Spirochaetae	Spirochaetes	Spirochaetes_Incertae_Sedis	Unknown_Family	Candidatus_Cloacamonas	Candidatus_Cloacimonas_acidaminovorans_str._Evry
OTU389	55	2	5	63	20	245	91	13	56	9	0	10	38	68	12	31	Bacteroidetes	Bacteroidia	Bacteroidales	Rikenellaceae	Alistipes
OTU390	1	4	0	8	5	6	2	0	0	9	0	1	14	0	0	1	Firmicutes	Clostridia	Clostridiales	Lachnospiraceae
OTU391	1	1	5	11	5	21	1	10	0	0	0	0	1	1	0	0	Firmicutes	Clostridia	Clostridiales	Christensenellaceae	uncultured	metagenome
OTU392	0	0	0	0	0	0	0	0	2	0	0	1	1	0	15	58	Firmicutes	Clostridia	Clostridiales	vadinBB60	no rank	uncultured_Firmicutes_bacterium
OTU393	0	471	0	0	0	0	0	0	0	0	0	0	0	0	0	0	Bacteroidetes	Bacteroidia	Bacteroidales	S24-7	no rank	uncultured_bacterium
OTU394	0	0	0	5	5	2	0	7	0	0	0	0	0	0	0	0	Firmicutes	Clostridia	Clostridiales
OTU395	0	2	1	2	18	20	1	1	0	0	0	0	0	0	0	0	Firmicutes	Clostridia	Clostridiales	Ruminococcaceae	uncultured	uncultured_Firmicutes_bacterium
OTU396	2	1	7	3	0	5	3	2	0	0	0	0	0	0	0	0	Firmicutes	Bacilli	Lactobacillales	Lactobacillaceae	Lactobacillus	Lactobacillus_paralimentarius
OTU397	0	169	0	0	0	0	0	0	0	0	0	0	0	0	0	0	Firmicutes	Clostridia	Clostridiales	Ruminococcaceae	Anaerotruncus	uncultured_bacterium
OTU398	42	2	4	50	8	17	91	1	2	0	1	2	0	9	0	8	Bacteroidetes	Bacteroidia	Bacteroidales	uncultured	uncultured	uncultured_organism
OTU399	0	14	0	0	0	8	0	0	0	0	0	0	0	0	0	0	Bacteroidetes	Bacteroidia	Bacteroidales	Prevotellaceae	uncultured	uncultured_Prevotellaceae_bacterium
OTU400	0	0	0	0	0	0	0	0	0	1	0	0	1	1	0	0	Firmicutes	Clostridia	Clostridiales	Lachnospiraceae
OTU401	13	2	0	0	0	0	0	0	0	0	0	0	0	0	0	0	Proteobacteria	Alphaproteobacteria	Caulobacterales	Caulobacteraceae	Brevundimonas	Brevundimonas_vesicularis
OTU402	0	0	0	3	4	3	1	1	0	0	0	0	0	4	0	1	Firmicutes	Clostridia	Clostridiales	Ruminococcaceae	Anaerotruncus
OTU403	0	0	0	0	0	0	0	0	1	0	0	0	1	8	0	4	Lentisphaerae
OTU404	5	8	6	61	91	138	24	46	2	1	0	3	7	0	0	15	Firmicutes	Clostridia	Clostridiales	Ruminococcaceae	uncultured	uncultured_rumen_bacterium_4C28d-18
OTU405	1	2	1	0	0	0	0	0	1	0	0	24	0	7	0	3	Actinobacteria	Actinobacteria	Micrococcales	Microbacteriaceae	Leucobacter
OTU406	76	2	19	31	51	56	21	18	10	8	18	2	8	34	1	9	Firmicutes	Clostridia	Clostridiales	Lachnospiraceae	uncultured
OTU408	0	0	7	2	5	12	1	2	0	0	0	0	0	1	0	1	Tenericutes	Mollicutes	RF9	no rank	no rank	uncultured_bacterium
OTU409	0	0	0	0	0	0	0	0	0	0	0	0	0	12	0	0	Verrucomicrobia	Verrucomicrobiae	Verrucomicrobiales	Verrucomicrobiaceae	Akkermansia	uncultured_bacterium
OTU410	1	0	0	0	0	0	0	0	0	0	8	4	0	0	0	0	Actinobacteria	Actinobacteria	Micrococcales
OTU411	4	0	0	0	0	0	0	0	0	0	0	0	0	0	0	0	Proteobacteria	Alphaproteobacteria	Caulobacterales	Caulobacteraceae	Brevundimonas	Brevundimonas_staleyi
OTU412	1	0	0	3	3	2	4	1	1	0	0	0	9	0	5	3	Firmicutes	Clostridia	Clostridiales	Ruminococcaceae	uncultured	uncultured_Oscillospira_sp.
OTU413	0	7	23	99	262	229	333	92	1	0	0	3	0	0	0	0	Bacteroidetes	Bacteroidia	Bacteroidales	Prevotellaceae	uncultured	uncultured_bacterium
OTU415	0	11	0	0	0	0	0	0	0	0	0	0	0	0	0	0	Chlorobi	Chlorobia	Chlorobiales	SJA-28	no rank
OTU416	0	1385	0	0	0	0	0	0	0	0	0	0	0	0	0	0	Firmicutes	Clostridia	Clostridiales	Lachnospiraceae	Blautia	Lachnospiraceae_bacterium_10-1
OTU417	0	392	0	0	0	0	0	0	0	1	0	0	6	12	1	8	Bacteroidetes	Bacteroidia	Bacteroidales	Rikenellaceae	Alistipes	uncultured_bacterium
OTU418	0	0	0	0	4	3	1	12	0	0	0	0	0	3	0	0	Firmicutes	Clostridia	Clostridiales	Christensenellaceae
OTU419	0	2	0	18	1	26	10	3	8	13	0	4	9	10	40	15	Bacteroidetes	Bacteroidia	Bacteroidales	Bacteroidaceae	Bacteroides
OTU420	0	105	0	0	0	0	0	0	0	0	0	0	0	0	0	0	Bacteroidetes	Bacteroidia	Bacteroidales	S24-7	no rank	uncultured_bacterium
OTU421	0	0	0	17	16	29	37	29	0	0	0	0	0	0	0	0	Firmicutes	Clostridia	Clostridiales	Ruminococcaceae	Ruminococcus	unidentified
OTU422	0	0	0	0	0	0	0	1	1	0	0	3	0	10	0	74	Firmicutes	Clostridia	Clostridiales	Ruminococcaceae	uncultured
OTU423	0	78	0	0	0	0	0	0	0	0	0	0	0	0	0	0	Firmicutes	Clostridia	Clostridiales	Lachnospiraceae
OTU424	0	0	0	2	0	0	1	1	0	0	1	0	0	8	0	1	Proteobacteria	Deltaproteobacteria	Desulfovibrionales	Desulfovibrionaceae
OTU425	0	1	0	9	0	2	34	2	0	4	0	0	2	13	6	5	Proteobacteria	Alphaproteobacteria	Rhodospirillales	Rhodospirillaceae	Thalassospira	uncultured_bacterium
OTU426	0	0	0	0	0	0	0	0	3	0	0	9	0	0	0	0	Proteobacteria	Alphaproteobacteria	Rhodobacterales	Rhodobacteraceae	Rubellimicrobium	uncultured_bacterium
OTU427	0	0	2	3	2	0	2	16	0	0	0	1	1	4	7	0	Firmicutes	Clostridia	Clostridiales	Ruminococcaceae	Incertae_Sedis
OTU428	0	0	0	1	0	1	1	0	0	0	0	0	0	0	1	1	Firmicutes	Erysipelotrichia	Erysipelotrichales	Erysipelotrichaceae	uncultured
OTU429	0	0	0	1	0	1	4	3	0	0	0	0	0	3	1	1	Proteobacteria	Deltaproteobacteria	Desulfovibrionales	Desulfovibrionaceae	Bilophila	uncultured_bacterium
OTU430	0	0	0	0	0	0	0	0	0	0	0	0	0	2	0	2	Actinobacteria	Actinobacteria	PeM15	no rank	no rank
OTU431	1	30	4	0	0	3	0	0	2	0	0	10	0	0	0	0	Proteobacteria	Gammaproteobacteria	Enterobacteriales	Enterobacteriaceae
OTU432	0	8	0	7	6	14	1	5	0	0	0	0	1	28	0	12	Firmicutes	Clostridia	Clostridiales	Ruminococcaceae	uncultured
OTU433	1	0	0	0	0	0	3	0	0	0	0	0	0	0	0	0	Firmicutes	Clostridia	Clostridiales	Ruminococcaceae	uncultured
OTU434	0	0	0	0	0	0	0	0	0	0	0	0	0	4	0	0	Actinobacteria	Actinobacteria	Corynebacteriales	Mycobacteriaceae	Mycobacterium
OTU435	10	1	0	24	5	61	28	6	3	4	1	4	1	30	8	26	Bacteroidetes	Bacteroidia	Bacteroidales	Porphyromonadaceae	Barnesiella	Barnesiella_viscericola_DSM_18177
OTU437	6	0	2	39	81	16	11	18	13	5	3	1	0	5	13	2	Firmicutes	Clostridia	Clostridiales	Ruminococcaceae
OTU438	19	0	8	1	1	1	2	0	6	1	0	2	0	0	1	0	Actinobacteria	Actinobacteria	Coriobacteriales	Coriobacteriaceae	Collinsella
OTU439	0	457	0	0	0	0	0	0	0	0	0	0	0	0	0	0	Bacteroidetes	Bacteroidia	Bacteroidales	S24-7	no rank	uncultured_bacterium
OTU440	4	0	1	0	0	0	0	0	0	0	0	4	0	1	0	0	Proteobacteria	Alphaproteobacteria	Rhizobiales	Rhizobiaceae	Rhizobium
OTU441	3175	16	4478	10	0	1	2	2	41	64	2362	1370	0	1	0	0	Firmicutes	Clostridia	Clostridiales	Peptostreptococcaceae	Incertae_Sedis	[Clostridium]_glycolicum
OTU442	0	8	0	0	0	0	0	0	0	0	0	0	0	0	0	0	Proteobacteria	Deltaproteobacteria	Desulfovibrionales	Desulfovibrionaceae	Bilophila	uncultured_bacterium
OTU443	0	13	0	0	0	0	0	0	0	0	0	0	0	0	0	0	Firmicutes	Clostridia	Clostridiales	Ruminococcaceae	uncultured
OTU444	1	3	0	0	0	0	0	0	1	0	0	4	0	0	0	0	Proteobacteria	Alphaproteobacteria	Sphingomonadales	Sphingomonadaceae	Sphingomonas	Sphingomonas_faeni
OTU445	0	0	0	15	4	6	3	2	0	0	0	0	0	0	0	0	Firmicutes	Clostridia	Clostridiales	Lachnospiraceae	Incertae_Sedis
OTU446	1	0	0	1	2	25	1	0	0	0	0	0	0	28	0	0	Bacteroidetes	Bacteroidia	Bacteroidales	Rikenellaceae	RC9_gut_group	uncultured_bacterium
OTU447	0	0	0	0	0	0	0	0	0	0	0	0	1	11	130	2	Spirochaetae	Spirochaetes	Spirochaetales	Spirochaetaceae	Treponema
OTU448	0	4	0	4	3	3	3	5	1	0	3	2	0	4	1	2	Firmicutes	Clostridia	Clostridiales	Christensenellaceae	uncultured
OTU449	1	0	0	1	1	4	15	0	0	0	0	0	0	0	0	0	Firmicutes	Clostridia	Clostridiales	vadinBB60	no rank
OTU450	0	0	0	0	0	0	0	0	0	0	0	0	0	26	0	2	Bacteroidetes	Bacteroidia	Bacteroidales
OTU451	0	277	0	0	0	0	0	0	0	0	0	0	0	0	0	0	Firmicutes	Clostridia	Clostridiales	Ruminococcaceae	Incertae_Sedis
OTU452	0	13	0	0	0	0	0	0	0	0	0	0	0	0	0	0	Proteobacteria	Gammaproteobacteria	Pseudomonadales	Pseudomonadaceae	Pseudomonas	Pseudomonas_citronellolis
OTU453	1	0	0	2	0	1	3	0	0	0	0	0	0	1	0	0	Proteobacteria	Gammaproteobacteria	Aeromonadales	Succinivibrionaceae	Succinatimonas	Succinatimonas_hippei
OTU454	6	0	2	0	0	0	0	0	0	2	0	1	0	0	0	0	Firmicutes	Clostridia	Clostridiales	Lachnospiraceae
OTU455	0	0	0	3	0	0	4	0	0	0	0	0	0	0	0	1	Firmicutes	Clostridia	Clostridiales	vadinBB60	no rank
OTU456	0	0	0	0	0	0	0	0	1	0	0	0	0	12	10	10	Bacteroidetes	Bacteroidia	Bacteroidales	Rikenellaceae	RC9_gut_group	uncultured_bacterium
OTU457	173	3	1	0	63	0	0	44	0	0	0	0	0	0	0	0	Firmicutes	Clostridia	Clostridiales	Ruminococcaceae	Subdoligranulum	uncultured_Ruminococcaceae_bacterium
OTU458	0	386	0	0	0	0	0	0	0	0	0	0	0	0	0	0	Bacteroidetes	Bacteroidia	Bacteroidales	Prevotellaceae	Alloprevotella	uncultured_Bacteroidales_bacterium
OTU459	0	278	0	0	0	0	0	0	0	0	0	0	0	0	0	0	Bacteroidetes	Bacteroidia	Bacteroidales	S24-7	no rank	uncultured_Bacteroidales_bacterium
OTU460	0	187	0	0	0	0	0	0	0	0	0	0	0	0	0	0	Bacteroidetes	Sphingobacteriia	Sphingobacteriales	WCHB1-69	no rank	bacterium_enrichment_culture_clone_ecb21
OTU461	0	1	0	0	0	23	0	0	5	0	1	9	0	15	4	30	Firmicutes	Clostridia	Clostridiales	Ruminococcaceae	uncultured	uncultured_bacterium_adhufec108
OTU462	0	0	0	7	1	1	1	4	0	0	0	0	0	0	0	1	Firmicutes
OTU463	42	1	15	122	185	71	88	165	2	8	6	3	27	51	10	10	Firmicutes	Clostridia	Clostridiales	Ruminococcaceae	Intestinimonas
OTU465	0	0	0	0	0	0	0	0	0	0	0	2	0	0	0	0	Proteobacteria	Alphaproteobacteria	Rhizobiales	Hyphomicrobiaceae	Devosia
OTU467	0	60	0	0	0	0	0	0	0	0	0	0	0	0	0	0	Firmicutes	Clostridia	Clostridiales	Ruminococcaceae	uncultured
OTU468	0	19	0	0	0	0	0	0	0	0	0	0	0	0	0	0	Firmicutes	Clostridia	Clostridiales	Ruminococcaceae	Acetivibrio	Acetivibrio_cellulolyticus
OTU472	0	0	0	0	2	1	1	0	0	0	0	0	0	0	0	0	Firmicutes	Clostridia	Clostridiales	Ruminococcaceae
OTU474	0	0	0	0	0	0	4	0	0	0	0	0	0	0	0	0	Lentisphaerae	Lentisphaeria	Victivallales	Victivallaceae	Victivallis	uncultured_bacterium
OTU475	0	0	0	5	9	6	2	1	1	1	1	0	2	10	0	4	Firmicutes	Clostridia	Clostridiales	Ruminococcaceae	Anaerotruncus	uncultured_bacterium
OTU476	2	0	1	0	1	6	1	0	0	0	0	0	0	1	0	2	Bacteroidetes	Bacteroidia	Bacteroidales	Porphyromonadaceae
OTU477	0	0	0	0	0	0	0	0	0	2	0	0	0	0	0	0	Bacteroidetes	Bacteroidia	Bacteroidales
OTU478	2	1	1	39	44	6	17	30	0	0	0	1	0	1	0	0	Firmicutes	Clostridia	Clostridiales	Christensenellaceae	uncultured	uncultured_bacterium
OTU479	408	92	2	63	2	8	0	15	49	50	724	4	90	0	2	2	Proteobacteria	Gammaproteobacteria	Enterobacteriales	Enterobacteriaceae	Escherichia-Shigella
OTU480	12	2	15	4	0	3	5	1	0	6	0	3	0	4	0	9	Firmicutes	Clostridia	Clostridiales	Lachnospiraceae	Incertae_Sedis	Clostridium_sp._ID11
OTU481	6	2	0	9	4	3	18	15	0	0	0	0	0	0	0	0	Firmicutes	Clostridia	Clostridiales	Christensenellaceae	uncultured	bacterium_YE57
OTU482	0	0	56	0	0	0	0	0	1	0	2	3	0	0	0	0	Actinobacteria	Actinobacteria	Micrococcales	Micrococcaceae	Rothia
OTU483	0	18	0	0	0	0	0	0	0	0	0	0	0	0	0	0	Firmicutes	Clostridia	Clostridiales	Ruminococcaceae	Anaerotruncus	uncultured_bacterium
OTU484	11	109	138	0	0	0	0	0	134	5	20	94	0	0	0	0	Actinobacteria	Actinobacteria	Micrococcales	Micrococcaceae	Arthrobacter
OTU485	19	4	8	144	50	381	299	5	0	0	0	2	0	0	0	0	Bacteroidetes	Bacteroidia	Bacteroidales
OTU486	0	50	0	0	0	0	0	0	0	0	0	0	0	0	0	0	Firmicutes	Clostridia	Clostridiales	Peptococcaceae	Pelotomaculum	Pelotomaculum_schinkii
OTU487	1	0	0	7	7	8	0	2	0	0	0	0	0	4	0	1	Firmicutes	Clostridia	Clostridiales	Lachnospiraceae	uncultured
OTU488	15	2	3	178	216	176	220	487	1	1	1	1	14	67	8	33	Firmicutes	Clostridia	Clostridiales	Ruminococcaceae	Oscillospira
OTU489	1	0	0	3	7	3	2	8	0	0	0	0	0	0	0	0	Firmicutes	Clostridia	Clostridiales	Ruminococcaceae	uncultured	uncultured_bacterium
OTU490	0	0	0	0	0	0	0	0	73	62	1	5	9	0	35	2	Actinobacteria	Actinobacteria	Coriobacteriales	Coriobacteriaceae	Collinsella	Collinsella_stercoris
OTU493	0	2	0	0	0	0	0	0	0	0	0	0	0	0	0	0	Candidate_division_TM7	no rank	no rank	no rank	no rank
OTU494	55	3	28	59	47	96	33	35	4	0	2	0	0	8	0	4	Firmicutes	Clostridia	Clostridiales	Lachnospiraceae
OTU495	3	173	0	2	1	1	0	1	0	0	0	0	0	0	0	0	Firmicutes	Clostridia	Clostridiales	Lachnospiraceae	uncultured	uncultured_bacterium
OTU496	0	1	9	35	11	8	103	3	6	5	10	13	14	184	148	199	Deferribacteres	Deferribacteres	Deferribacterales	Deferribacteraceae	Mucispirillum	uncultured_bacterium
OTU497	1	0	0	0	0	0	0	0	0	0	0	13	0	0	0	0	Cyanobacteria	Cyanobacteria	SubsectionIII	FamilyI	Microcoleus	Oscillatoria_nigro-viridis_PCC_7112
OTU498	9	0	0	0	0	0	0	0	0	0	0	0	0	0	0	0	Proteobacteria	Betaproteobacteria	Burkholderiales	Alcaligenaceae	Sutterella
OTU499	1	0	2	0	0	1	2	0	0	0	0	1	0	0	0	0	Firmicutes	Bacilli	Lactobacillales	Lactobacillaceae	Lactobacillus	Lactobacillus_curvatus
OTU500	0	77	0	0	0	0	0	0	0	0	0	0	0	0	0	0	Firmicutes	Clostridia	Clostridiales	Ruminococcaceae	Anaerotruncus	uncultured_bacterium
OTU502	0	17	0	0	0	0	0	0	0	0	0	0	0	0	0	0	Spirochaetae	Spirochaetes	Spirochaetales	Spirochaetales_Incertae_Sedis	Exilispira	uncultured_bacterium
OTU503	7	0	4	0	1	0	0	0	0	0	0	0	0	0	0	0	Firmicutes	Bacilli	Bacillales	Bacillaceae	Bacillus
OTU504	0	0	0	3	0	0	1	8	0	0	0	0	0	0	0	0	Firmicutes	Clostridia	Clostridiales	Lachnospiraceae	Coprococcus	uncultured_Firmicutes_bacterium
OTU505	0	0	1	3	12	9	0	0	3	0	0	0	3	0	0	3	Firmicutes	Clostridia	Clostridiales	Ruminococcaceae	uncultured
OTU506	15	0	0	0	4	0	0	0	0	1	23	0	0	0	0	0	Proteobacteria	Betaproteobacteria	Burkholderiales	Burkholderiaceae	Ralstonia	Ralstonia_pickettii
OTU507	0	26	0	4	1	12	3	26	0	0	0	0	2	0	0	13	Firmicutes	Clostridia	Clostridiales	Lachnospiraceae
OTU508	0	0	0	0	0	8	0	5	0	0	0	0	0	0	0	0	Tenericutes	Mollicutes	RF9	no rank	no rank	uncultured_bacterium
OTU509	0	14	0	3	0	0	1	4	0	0	0	0	0	2	0	1	Firmicutes	Clostridia	Clostridiales	Lachnospiraceae	Incertae_Sedis	Clostridium_clostridioforme_CM201
OTU510	0	3	0	134	0	258	53	4	0	0	0	1	0	0	0	0	Firmicutes	Clostridia	Clostridiales	Ruminococcaceae	uncultured	unidentified_rumen_bacterium_RFN25
OTU511	3	1	4	3	5	0	6	2	223	11	1	11	3	3	6	3	Firmicutes	Erysipelotrichia	Erysipelotrichales	Erysipelotrichaceae	Incertae_Sedis	[Eubacterium]_cylindroides
OTU512	26	1	8	0	5	0	0	2	349	33	0	7	35	1	24	5	Firmicutes	Erysipelotrichia	Erysipelotrichales	Erysipelotrichaceae
OTU513	0	0	1	0	0	0	0	0	7	78	6	2	17	14	0	46	Bacteroidetes	Bacteroidia	Bacteroidales	Prevotellaceae	Prevotella
OTU514	3	0	0	1	0	1	2	0	0	0	0	0	0	0	0	0	Firmicutes	Clostridia	Clostridiales	vadinBB60	no rank	uncultured_bacterium
OTU515	21	115	278	0	0	0	0	0	172	4	15	137	1	0	0	0	Firmicutes	Bacilli	Bacillales	Bacillaceae	Bacillus
OTU517	31	2	9	3	8	16	3	2	0	1	0	2	2	0	6	0	Firmicutes	Erysipelotrichia	Erysipelotrichales	Erysipelotrichaceae	uncultured	Clostridiales_bacterium_10-3b
OTU518	0	0	0	0	0	0	0	0	0	0	2	0	0	31	0	0	Spirochaetae	Spirochaetes	Spirochaetales	Spirochaetaceae	Treponema
OTU520	1	0	0	0	0	0	0	0	4	0	0	16	0	0	0	0	Proteobacteria	Alphaproteobacteria	Rhodobacterales	Rhodobacteraceae	Paracoccus
OTU521	200	4	25	454	716	40	163	782	1	43	2	16	92	14	2	5	Proteobacteria	Deltaproteobacteria	Desulfovibrionales	Desulfovibrionaceae	Desulfovibrio
OTU522	0	0	0	0	0	0	0	0	0	0	0	0	0	8	1	0	Bacteroidetes	Bacteroidia	Bacteroidales	Rikenellaceae
OTU523	0	0	0	0	0	0	0	0	1	0	0	0	3	1	0	1	Firmicutes	Clostridia	Clostridiales	Ruminococcaceae
OTU524	0	0	0	0	0	0	0	0	0	0	1	3	1	13	0	5	Bacteroidetes	Bacteroidia	Bacteroidales	Bacteroidaceae	Bacteroides	uncultured_bacterium
OTU525	0	0	0	0	0	0	0	0	0	0	0	5	0	0	0	0	Firmicutes	Bacilli	Lactobacillales	Carnobacteriaceae	Trichococcus	uncultured_bacterium
OTU526	0	0	0	0	0	0	1	0	0	0	0	4	0	1	0	0	Actinobacteria	Actinobacteria	Micrococcales	Sanguibacteraceae	Sanguibacter	Sanguibacter_antarcticus
OTU527	2	0	1	1	0	1	0	3	54	15	2	3	9	2	10	11	Firmicutes	Clostridia	Clostridiales	Lachnospiraceae
OTU529	4	5	1	5	9	2	4	2	0	1	0	0	2	0	0	0	Firmicutes	Clostridia	Clostridiales	Lachnospiraceae	Coprococcus
OTU530	1	0	0	4	6	1	0	1	1	0	0	1	1	10	0	10	Firmicutes	Clostridia	Clostridiales	Ruminococcaceae	uncultured	Clostridium_sp._ATCC_29733
OTU531	0	21	0	0	0	0	0	0	0	0	0	0	0	0	0	0	Bacteroidetes	Bacteroidia	Bacteroidales	Rikenellaceae	Alistipes	uncultured_Rikenellaceae_bacterium
OTU532	2	0	0	16	11	8	7	17	1	0	0	0	0	1	0	1	Firmicutes	Clostridia	Clostridiales	Peptococcaceae	Peptococcus	uncultured_organism
OTU533	0	0	0	0	0	0	0	0	1	0	0	6	0	0	0	0	Actinobacteria	Actinobacteria	Frankiales	uncultured	uncultured
OTU534	2	4	0	2	8	6	4	4	0	0	0	0	0	0	0	0	Firmicutes	Clostridia	Clostridiales	Lachnospiraceae	Incertae_Sedis	Eubacterium_ventriosum
OTU535	11	5	5	39	11	292	97	10	2	0	0	2	0	0	0	0	Bacteroidetes	Bacteroidia	Bacteroidales	Rikenellaceae	RC9_gut_group	uncultured_bacterium
OTU537	0	4	0	0	0	0	0	0	0	0	0	0	0	0	0	0	Firmicutes	Clostridia	Clostridiales	Lachnospiraceae	Lachnospira	uncultured_bacterium
OTU538	0	0	1	0	0	0	0	0	0	0	0	0	0	0	0	1	Proteobacteria	Betaproteobacteria	Burkholderiales	Burkholderiaceae	Polynucleobacter
OTU539	0	49	0	0	0	0	0	0	0	0	0	0	0	0	0	0	Firmicutes	Clostridia	Clostridiales	Ruminococcaceae	Incertae_Sedis	uncultured_Clostridia_bacterium
OTU540	90	3	3	673	112	70	3692	61	12	7	11	6	8	216	23	843	Bacteroidetes	Bacteroidia	Bacteroidales	Prevotellaceae
OTU541	0	54	0	0	0	0	0	0	0	0	0	0	0	0	0	0	Bacteroidetes	Bacteroidia	Bacteroidales	S24-7	no rank	uncultured_bacterium
OTU542	0	0	0	5	1	3	5	11	0	0	0	0	0	0	0	0	Firmicutes	Clostridia	Clostridiales	Ruminococcaceae	uncultured
OTU543	3	4	0	10	5	59	2	21	0	0	0	0	1	31	0	19	Firmicutes	Clostridia	Clostridiales	Ruminococcaceae	uncultured
OTU544	0	55	0	0	0	0	0	0	0	0	0	0	0	0	0	0	Firmicutes	Clostridia	Clostridiales	Clostridiaceae_1	Clostridium_sensu_stricto_8	uncultured_Clostridiales_bacterium
OTU545	0	0	1	19	3	10	348	2	0	0	0	0	0	2	2	0	Spirochaetae	Spirochaetes	Spirochaetales	Spirochaetaceae
OTU546	0	81	0	0	0	0	0	0	0	0	0	0	0	0	0	0	Bacteroidetes	Bacteroidia	Bacteroidales	S24-7	no rank	uncultured_bacterium
OTU547	1	1	0	0	0	0	0	0	0	0	0	1	0	0	0	0	Actinobacteria	Actinobacteria	Micrococcales	Microbacteriaceae	Candidatus_Planktoluna
OTU548	0	3	0	0	0	0	0	0	0	0	0	0	0	0	0	0	Firmicutes	Clostridia	Clostridiales	Ruminococcaceae
OTU549	3	0	0	0	0	0	4	1	0	5	0	0	1	9	2	2	Bacteroidetes	Bacteroidia	Bacteroidales	Rikenellaceae	Alistipes	Alistipes_indistinctus_YIT_12060
OTU550	50	19	52	287	268	746	177	378	151	258	32	98	163	662	305	562	Bacteroidetes	Bacteroidia	Bacteroidales	Bacteroidaceae	Bacteroides	Bacteroides_barnesiae
OTU551	0	0	0	0	0	0	0	0	5	2	1	30	0	0	0	0	Proteobacteria	Gammaproteobacteria	Pasteurellales	Pasteurellaceae	Gallibacterium	Gallibacterium_genomosp._3
OTU552	1	0	0	0	0	0	0	0	0	0	0	2	0	0	0	0	Actinobacteria	Actinobacteria	Frankiales	Sporichthyaceae	hgcI_clade	uncultured_bacterium
OTU553	0	5	2	0	0	0	0	0	4	0	2	5	0	0	0	0	Proteobacteria	Gammaproteobacteria	Pseudomonadales	Moraxellaceae	Psychrobacter	Psychrobacter_immobilis
OTU554	1	62	0	0	0	0	0	0	3	32	0	0	10	0	6	0	Firmicutes	Clostridia	Clostridiales	Lachnospiraceae	Incertae_Sedis
OTU555	0	0	0	0	0	0	0	0	10	5	0	0	1	0	0	2	Firmicutes	Erysipelotrichia	Erysipelotrichales	Erysipelotrichaceae	Solobacterium
OTU556	0	0	0	26	2	0	25	2	39	205	60	520	182	129	90	91	Proteobacteria	Deltaproteobacteria	Desulfovibrionales	Desulfovibrionaceae	Desulfovibrio
OTU557	0	0	1	6	10	12	1	5	0	0	0	0	0	2	0	0	Firmicutes	Clostridia	Clostridiales	Ruminococcaceae	uncultured	uncultured_Bacillus_sp.
OTU558	364	4	30	651	304	1082	402	84	8	2	0	6	1	0	100	0	Bacteroidetes	Bacteroidia	Bacteroidales	Bacteroidaceae	Bacteroides	bacterium_'New_Zealand_B'
OTU560	0	9	0	0	0	0	0	0	0	0	0	0	0	0	0	0	Firmicutes	Clostridia	Clostridiales	Ruminococcaceae	uncultured
OTU561	0	0	0	0	0	0	0	0	0	0	5	2	0	0	0	0	Firmicutes	Bacilli	Bacillales	Bacillaceae	uncultured	uncultured_Firmicutes_bacterium
OTU562	0	9	0	0	0	0	0	0	0	0	0	0	0	0	0	0	Chloroflexi	Anaerolineae	Anaerolineales	Anaerolineaceae	Leptolinea	uncultured_Anaerolineaceae_bacterium
OTU564	0	4	0	0	0	0	0	0	0	0	0	0	0	0	0	0	Bacteroidetes	Bacteroidia	Bacteroidales	S24-7	no rank	uncultured_bacterium
OTU566	0	0	0	0	0	0	0	0	8	41	4	1	398	596	404	74	Bacteroidetes	Bacteroidia	Bacteroidales
OTU567	0	0	0	0	0	0	0	0	0	0	0	0	0	3	0	0	Firmicutes	Clostridia	Clostridiales	vadinBB60	no rank
OTU568	22	239	508	0	1	0	0	0	343	4	21	248	0	0	0	0	Firmicutes	Bacilli	Lactobacillales	Streptococcaceae	Lactococcus	Lactococcus_lactis_subsp._lactis
OTU569	0	0	0	1	0	3	1	0	0	0	0	0	0	11	0	0	Firmicutes	Clostridia	Clostridiales
OTU570	0	859	0	0	0	0	0	0	0	0	0	0	0	2	0	1	Firmicutes	Clostridia	Clostridiales	Ruminococcaceae
OTU571	0	0	0	1	1	0	0	14	0	0	0	0	0	1	0	1	Firmicutes	Clostridia	Clostridiales	Lachnospiraceae	Roseburia	uncultured_organism
OTU572	8	3	4	81	63	55	49	84	0	1	3	0	4	58	0	55	Firmicutes	Clostridia	Clostridiales	Lachnospiraceae	uncultured
OTU573	0	6	0	0	0	0	0	0	0	0	0	0	0	0	0	0	Bacteroidetes	Sphingobacteriia	Sphingobacteriales	ST-12K33	no rank	uncultured_bacterium
OTU574	0	0	0	1	0	5	1	6	0	0	0	0	0	0	0	0	Firmicutes	Clostridia	Clostridiales	Ruminococcaceae
OTU575	0	203	0	0	0	0	0	0	0	0	0	0	0	0	0	0	Firmicutes	Clostridia	Clostridiales	Ruminococcaceae	Incertae_Sedis
OTU576	0	4	0	9	1	102	2	1	0	0	0	0	0	0	0	0	Firmicutes	Clostridia	Clostridiales	Lachnospiraceae
OTU577	227	1	34	364	312	29	217	51	19	339	6	41	145	157	70	1077	Firmicutes	Negativicutes	Selenomonadales	Acidaminococcaceae	Phascolarctobacterium
OTU578	4	148	2	0	0	0	0	1	2	1	0	0	2	0	1	0	Firmicutes	Clostridia	Clostridiales	Defluviitaleaceae	Incertae_Sedis	uncultured_bacterium
OTU579	0	11	0	0	0	0	0	0	0	0	0	0	0	0	0	0	Chloroflexi	Anaerolineae	Anaerolineales	Anaerolineaceae	Longilinea	uncultured_bacterium
OTU580	1	2	1	87	2	28	66	0	12	17	0	11	21	25	42	72	Bacteroidetes	Bacteroidia	Bacteroidales	Porphyromonadaceae	Parabacteroides	uncultured_bacterium
OTU581	33	4	0	0	1	0	0	0	0	4	57	0	0	0	0	0	Proteobacteria	Alphaproteobacteria	Rhizobiales	Bradyrhizobiaceae	Bradyrhizobium
OTU582	13	0	5	9	1	10	5	1	0	0	0	0	1	0	0	0	Firmicutes	Erysipelotrichia	Erysipelotrichales	Erysipelotrichaceae	Incertae_Sedis	unidentified
OTU583	13	4	19	79	31	116	23	22	6	1	0	0	1	12	0	25	Firmicutes	Clostridia	Clostridiales	Ruminococcaceae	uncultured
OTU584	0	0	0	0	0	0	0	0	0	0	0	0	0	2	0	0	Bacteroidetes	Bacteroidia	Bacteroidales
OTU585	0	0	0	0	0	0	0	0	1	0	0	6	0	0	0	0	Proteobacteria	Alphaproteobacteria	Rhizobiales	Hyphomicrobiaceae	Devosia	uncultured_bacterium
OTU586	1	0	0	20	2	20	59	0	1	0	0	2	0	0	243	1	Deferribacteres	Deferribacteres	Deferribacterales	Deferribacteraceae	Mucispirillum
OTU587	0	0	1	14	18	10	11	8	0	0	0	0	0	0	0	0	Firmicutes	Clostridia	Clostridiales	Christensenellaceae	uncultured
OTU588	0	0	0	0	0	0	0	0	75	61	5	12	18	4	53	4	Firmicutes	Clostridia	Clostridiales	Eubacteriaceae	Eubacterium
OTU589	384	43	324	19	6	15	7	4	4649	96	1574	2736	2	26	2	5	Firmicutes	Erysipelotrichia	Erysipelotrichales	Erysipelotrichaceae	Turicibacter
OTU591	1	0	0	0	0	2	0	0	0	0	0	0	0	1	0	0	Firmicutes	Clostridia	Clostridiales	Ruminococcaceae
OTU592	0	0	0	1	0	0	4	0	0	0	0	0	1	1	0	2	Firmicutes	Clostridia	Clostridiales	vadinBB60	no rank	uncultured_bacterium
OTU593	85	1174	331	0	88	0	0	0	0	0	25	1	1	0	0	1	Proteobacteria	Epsilonproteobacteria	Campylobacterales	Helicobacteraceae	Helicobacter
OTU594	359	5	19	1637	356	3160	1105	207	10	0	0	20	0	6	27	35	Bacteroidetes	Bacteroidia	Bacteroidales
OTU595	0	43	0	0	0	0	0	0	0	0	0	0	0	0	0	0	Proteobacteria	Alphaproteobacteria	Rhodospirillales	Rhodospirillaceae	Thalassospira	uncultured_bacterium
OTU596	0	0	0	2	0	4	3	1	0	0	1	0	0	6	0	0	Firmicutes	Clostridia	Clostridiales	Ruminococcaceae	Ruminococcus
OTU597	1	0	0	1	7	1	2	2	0	0	0	0	0	0	0	0	Firmicutes	Clostridia	Clostridiales	Ruminococcaceae
OTU598	8	0	0	1	15	1	0	3	3	5	0	1	17	0	0	4	Firmicutes	Clostridia	Clostridiales	Lachnospiraceae
OTU599	0	24	0	0	0	0	0	0	0	0	0	0	0	0	0	0	Firmicutes	Clostridia	Clostridiales	Ruminococcaceae	uncultured	uncultured_Bacillus_sp.
OTU600	18	1	2	0	6	0	2	5	0	0	0	0	0	0	0	0	Actinobacteria	Actinobacteria	Coriobacteriales	Coriobacteriaceae
OTU601	0	3	4	0	0	0	0	1	0	0	0	3	0	0	0	0	Proteobacteria	Gammaproteobacteria	Pseudomonadales	Moraxellaceae	Acinetobacter
OTU602	56	178	13	45	33	89	106	70	6	3	0	1	97	73	74	86	Firmicutes	Clostridia	Clostridiales	Ruminococcaceae
OTU603	0	0	0	2	1	0	4	3	0	0	0	0	0	0	0	0	Firmicutes	Clostridia	Clostridiales	Family_XIII	uncultured	uncultured_bacterium
OTU604	0	1	0	0	0	0	0	0	0	0	0	28	0	0	0	0	Actinobacteria	Actinobacteria	Micromonosporales	Micromonosporaceae
OTU605	0	181	0	3	7	11	1	2	0	0	0	0	0	0	0	0	Firmicutes	Clostridia	Clostridiales	Lachnospiraceae	Coprococcus	unidentified
OTU606	0	0	0	0	0	0	0	0	4	4	2	0	0	0	0	0	Synergistetes	Synergistia	Synergistales	Synergistaceae
OTU607	0	7	8	0	0	0	0	0	8	0	0	6	1	0	0	0	Proteobacteria	Alphaproteobacteria	Rhizobiales	Methylobacteriaceae	Methylobacterium
OTU608	0	0	5	29	8	35	42	3	0	0	1	1	0	204	0	242	Bacteroidetes	Bacteroidia	Bacteroidales
OTU609	0	0	0	2	0	3	9	0	0	0	0	0	0	1	0	4	Firmicutes	Clostridia	Clostridiales	Ruminococcaceae	uncultured
OTU611	30	3	0	0	0	0	0	0	0	1	0	21	0	0	0	0	Proteobacteria	Betaproteobacteria	Burkholderiales	Oxalobacteraceae	Massilia
OTU612	0	4	0	2	0	0	2	0	0	0	0	0	0	0	0	0	Bacteroidetes	Bacteroidia	Bacteroidales	Porphyromonadaceae
OTU614	0	0	0	0	0	0	0	0	2	0	0	0	0	8	1	1	Bacteroidetes	Bacteroidia	Bacteroidales	Rikenellaceae	RC9_gut_group
OTU615	0	0	2	0	0	0	0	0	47	0	13	11	0	630	1	299	Bacteroidetes	Bacteroidia	Bacteroidales	Bacteroidaceae	Bacteroides	Bacteroides_barnesiae
OTU616	0	0	1	0	1	0	0	2	0	0	0	0	0	0	0	0	Firmicutes	Clostridia	Clostridiales	Ruminococcaceae	Incertae_Sedis
OTU617	2	0	0	7	4	2	5	11	6	0	0	0	0	3	0	2	Firmicutes	Clostridia	Clostridiales	Ruminococcaceae	uncultured
OTU619	47	2	14	1	1	16	4	1	1	0	0	1	0	0	0	0	Firmicutes	Clostridia	Clostridiales	Lachnospiraceae	Anaerostipes	Anaerostipes_butyraticus
OTU620	2	0	1	49	11	9	70	1	2	0	0	0	14	2	0	10	Bacteroidetes	Bacteroidia	Bacteroidales	Rikenellaceae	Alistipes	uncultured_bacterium
OTU621	73	1	0	40	12	87	72	4	1	1	0	2	6	3	29	4	Firmicutes	Clostridia	Clostridiales	Ruminococcaceae	Incertae_Sedis
OTU622	1	0	0	4	4	0	5	6	0	0	0	0	0	0	0	0	Firmicutes	Clostridia	Clostridiales	Ruminococcaceae
OTU624	2	0	0	0	0	0	0	0	0	0	0	0	0	0	0	0	Firmicutes	Negativicutes	Selenomonadales	Veillonellaceae	Veillonella
OTU625	51	11	5	281	23	93	31	487	0	0	1	0	0	16	0	41	Firmicutes	Clostridia	Clostridiales	Ruminococcaceae	uncultured	Clostridium_papyrosolvens
OTU626	0	0	0	2	1	1	7	0	0	0	5	0	0	307	0	10	Firmicutes	Clostridia	Clostridiales	vadinBB60	no rank
OTU627	0	0	0	1	3	2	0	0	0	0	0	0	0	0	0	0	Actinobacteria	Actinobacteria	Coriobacteriales	Coriobacteriaceae
OTU629	0	0	0	0	0	0	0	0	0	0	0	10	0	0	0	0	Proteobacteria	Alphaproteobacteria	Rhodospirillales	Acetobacteraceae	Craurococcus	uncultured_bacterium
OTU630	0	0	0	7	0	5	14	0	0	0	0	0	0	0	0	0	Tenericutes	Mollicutes	Anaeroplasmatales	Anaeroplasmataceae	Anaeroplasma	gut_metagenome
OTU631	8	0	1	18	6	40	106	1	0	0	0	0	0	0	1	7	Spirochaetae	Spirochaetes	Spirochaetales	Spirochaetaceae
OTU632	0	0	0	0	0	1	2	0	0	0	0	0	0	2	0	0	Firmicutes	Clostridia	Clostridiales	Christensenellaceae	uncultured
OTU633	0	0	0	0	0	0	1	0	0	0	0	0	0	21	0	3	Lentisphaerae	Lentisphaeria	Victivallales	Victivallaceae	Victivallis	uncultured_organism
OTU634	4	2	4	13	7	5	11	3	1	0	0	0	0	0	0	0	Actinobacteria	Actinobacteria	Coriobacteriales	Coriobacteriaceae	uncultured	uncultured_organism
OTU635	5	1	0	2	1	9	2	6	0	0	0	0	0	1	0	1	Firmicutes	Clostridia	Clostridiales	Ruminococcaceae	uncultured
OTU636	1	0	1	1	8	3	0	4	1	0	0	0	0	5	0	0	Firmicutes	Clostridia	Clostridiales	Ruminococcaceae	Anaerotruncus
OTU637	0	0	0	0	0	0	0	0	65	1	1	6	0	1	1	1	Firmicutes	Erysipelotrichia	Erysipelotrichales	Erysipelotrichaceae	Incertae_Sedis
OTU638	0	0	0	0	0	0	0	0	118	48	1	4	0	0	5	1	Actinobacteria	Actinobacteria	Coriobacteriales	Coriobacteriaceae	Collinsella	Collinsella_tanakaei
OTU639	22	0	1	31	12	8	22	5	1	0	0	0	1	4	1	1	Bacteroidetes	Bacteroidia	Bacteroidales	Bacteroidaceae	Bacteroides
OTU640	9	0	0	27	3	6	125	0	0	0	0	0	0	0	0	0	Bacteroidetes	Bacteroidia	Bacteroidales	Prevotellaceae
OTU641	0	0	0	0	0	0	1	0	3	0	0	0	0	0	0	0	Firmicutes	Clostridia	Clostridiales	Peptococcaceae	Peptococcus	uncultured_bacterium
OTU642	0	0	0	0	0	2	0	0	0	0	1	0	0	0	0	0	Firmicutes	Clostridia	Clostridiales	Ruminococcaceae	Ruminococcus	Ruminococcus_bromii
OTU643	0	357	0	0	0	0	0	0	0	0	0	0	0	0	0	0	Firmicutes	Clostridia	Clostridiales	Lachnospiraceae
OTU644	2	0	0	0	0	0	0	0	2	11	0	0	57	5	7	25	Bacteroidetes	Bacteroidia	Bacteroidales
OTU645	3	0	0	4	9	2	3	20	0	0	0	0	0	0	0	0	Firmicutes	Clostridia	Clostridiales	Ruminococcaceae	Oscillibacter
OTU646	165	4	37	118	177	195	211	211	11	6	2	4	40	37	63	18	Firmicutes	Clostridia	Clostridiales	Ruminococcaceae	Incertae_Sedis
OTU648	30	0	0	3	3	1	1	20	0	0	0	0	0	0	0	3	Firmicutes	Clostridia	Clostridiales	Ruminococcaceae	uncultured
OTU649	26	2	7	56	38	59	36	65	0	0	0	0	0	0	0	0	Firmicutes	Clostridia	Clostridiales	Ruminococcaceae	uncultured	unidentified_rumen_bacterium_JW32
OTU650	0	59	0	0	0	0	0	0	0	0	0	0	0	0	0	0	Bacteroidetes	Bacteroidia	Bacteroidales	S24-7	no rank
OTU651	0	295	0	0	0	0	2	1	0	0	0	0	0	0	0	0	Firmicutes	Clostridia	Clostridiales	Lachnospiraceae	uncultured	uncultured_Clostridium_sp.
OTU652	63	3	16	20	69	81	8	13	37	109	2	4	41	3	5	6	Firmicutes	Clostridia	Clostridiales	Lachnospiraceae
OTU653	0	0	4	0	19	0	0	0	0	0	138	11	0	4	0	0	Firmicutes	Bacilli	Lactobacillales	Lactobacillaceae	Lactobacillus	Lactobacillus_aviarius
OTU654	0	0	2	2	1	0	1	0	0	0	0	0	3	0	0	0	Proteobacteria	Gammaproteobacteria	Aeromonadales	Succinivibrionaceae	Anaerobiospirillum
OTU655	0	0	0	0	0	0	0	0	0	0	0	0	0	3	0	0	Bacteroidetes	Bacteroidia	Bacteroidales	Rikenellaceae	RC9_gut_group
OTU656	3	1	5	37	18	9	10	8	3	0	2	1	0	7	0	1	Firmicutes	Clostridia	Clostridiales	Christensenellaceae	uncultured
OTU657	0	20	0	0	0	0	0	0	0	0	0	0	0	0	0	0	Synergistetes	Synergistia	Synergistales	Synergistaceae	Aminobacterium	uncultured_bacterium
OTU658	2	0	0	0	0	5	3	0	1	1	0	3	2	10	3	2	Bacteroidetes	Bacteroidia	Bacteroidales	Rikenellaceae	Alistipes
OTU659	0	1	1	36	5	31	4	1	1	0	0	0	0	2	0	0	Firmicutes	Clostridia	Clostridiales	Ruminococcaceae	uncultured
OTU660	2	16	0	2	0	2	2	36	0	2	0	1	33	22	19	12	Firmicutes	Clostridia	Clostridiales	Ruminococcaceae	Faecalibacterium
OTU661	242	10	4	330	79	361	1145	26	23	8	5	5	5	124	48	49	Bacteroidetes	Bacteroidia	Bacteroidales	Bacteroidaceae	Bacteroides	uncultured_bacterium
OTU662	101	5	1	79	11	83	297	2	24	29	2	22	19	73	150	56	Bacteroidetes	Bacteroidia	Bacteroidales	Bacteroidaceae	Bacteroides
OTU663	0	0	1	2	2	4	0	0	0	0	0	0	0	0	1	0	Firmicutes	Clostridia	Clostridiales	Ruminococcaceae	uncultured	Eubacterium_coprostanoligenes
OTU664	391	26	239	818	763	453	315	362	69	176	16	70	104	18	430	63	Firmicutes	Clostridia	Clostridiales	Lachnospiraceae	Incertae_Sedis
OTU665	1	0	0	6	3	2	12	11	0	0	0	0	0	0	0	0	Proteobacteria	Deltaproteobacteria	Desulfovibrionales	Desulfovibrionaceae	Desulfovibrio
OTU666	0	0	0	36	0	0	112	17	0	0	0	0	0	0	0	0	Bacteroidetes	Bacteroidia	Bacteroidales	Prevotellaceae	uncultured	uncultured_bacterium
OTU668	0	0	0	0	0	0	0	0	0	1	0	0	3	0	0	0	Bacteroidetes	Bacteroidia	Bacteroidales
OTU670	0	0	1	26	23	2	10	21	0	0	0	0	0	3	0	3	Firmicutes	Clostridia	Clostridiales	Ruminococcaceae	uncultured
OTU672	0	0	0	8	0	1	7	0	0	0	0	0	0	0	0	0	Bacteroidetes	Bacteroidia	Bacteroidales	Porphyromonadaceae	Barnesiella
OTU673	0	11	0	0	0	0	0	0	0	0	0	0	0	0	0	0	Firmicutes	Clostridia	Clostridiales	Ruminococcaceae
OTU674	41	8	8	30	47	38	29	29	7	17	1	3	52	12	63	20	Firmicutes	Clostridia	Clostridiales	Ruminococcaceae	uncultured
OTU675	0	71	0	0	0	0	0	0	0	0	0	0	0	0	0	0	Bacteroidetes	Bacteroidia	Bacteroidales	S24-7	no rank	uncultured_Bacteroidales_bacterium
OTU676	0	0	0	1	0	11	0	0	0	0	0	0	0	7	0	0	Bacteroidetes	Bacteroidia	Bacteroidales	Rikenellaceae
OTU677	0	3	0	0	0	2	0	0	0	0	0	0	0	0	0	0	Firmicutes	Clostridia	Clostridiales	Ruminococcaceae	Anaerotruncus	uncultured_Clostridiaceae_bacterium
OTU678	0	0	0	0	0	0	0	0	2	8	0	4	2	0	1	0	Actinobacteria	Actinobacteria	Bifidobacteriales	Bifidobacteriaceae	Bifidobacterium	Bifidobacterium_saeculare
OTU679	42	1	2	25	16	31	518	4	0	0	0	0	0	9	0	1	Bacteroidetes	Bacteroidia	Bacteroidales	Rikenellaceae	RC9_gut_group	uncultured_bacterium
OTU680	14	0	25	0	0	0	0	0	2	0	1	3	0	0	0	0	Firmicutes	Clostridia	Clostridiales	Lachnospiraceae	Cellulosilyticum	Clostridium_lentocellum_DSM_5427
OTU681	2	0	0	11	0	0	9	0	2	5	0	1	25	17	16	39	Bacteroidetes	Bacteroidia	Bacteroidales	Bacteroidaceae	Bacteroides
OTU683	9	34	86	0	0	0	0	0	50	0	14	29	0	0	0	0	Firmicutes	Bacilli	Bacillales	Bacillaceae	Bacillus
OTU684	0	5	0	55	16	27	87	17	1	25	2	0	169	40	394	524	Bacteroidetes	Bacteroidia	Bacteroidales
OTU685	0	38	0	0	0	0	0	0	0	0	0	0	0	0	0	0	Firmicutes	Clostridia	Clostridiales	Lachnospiraceae	uncultured	Clostridium_sp._Clone-17
OTU686	0	0	0	0	0	0	0	0	0	0	2	0	0	31	0	0	Bacteroidetes	Bacteroidia	Bacteroidales	S24-7	no rank	uncultured_bacterium
OTU687	0	0	0	0	0	0	0	0	0	0	70	3	0	0	0	0	Firmicutes	Clostridia	Clostridiales	Clostridiaceae_1	Clostridium_sensu_stricto_1	Clostridium_paraputrificum
OTU688	1	24	62	0	0	0	0	0	43	0	3	31	0	0	0	0	Firmicutes	Bacilli	Lactobacillales	Streptococcaceae	Streptococcus	Streptococcus_agalactiae
OTU689	0	0	0	0	0	0	0	0	0	0	0	0	28	0	0	0	Firmicutes	Negativicutes	Selenomonadales	Veillonellaceae	Veillonella
OTU690	0	20	0	32	2	4	10	13	0	0	0	0	0	3	0	15	Firmicutes	Clostridia	Clostridiales	Lachnospiraceae
OTU691	1	0	0	2	0	0	4	0	0	1	0	1	1	1	9	0	Proteobacteria	Betaproteobacteria	Burkholderiales	Alcaligenaceae	Sutterella
OTU692	0	0	0	0	0	0	0	0	0	0	0	3	1	1	0	0	Actinobacteria	Actinobacteria	Propionibacteriales	Nocardioidaceae	Nocardioides
OTU693	2	0	1	3	1	46	4	1	0	0	0	0	0	5	0	0	Bacteroidetes	Bacteroidia	Bacteroidales	Porphyromonadaceae	Odoribacter	uncultured_bacterium
OTU694	2	0	0	0	0	0	0	0	0	0	3	2	0	0	0	0	Firmicutes	Bacilli	Bacillales	Family_XII	Exiguobacterium	Exiguobacterium_sp._AT1b
OTU695	0	0	0	1	1	0	0	0	2	1	0	0	0	0	1	1	Actinobacteria	Actinobacteria	Coriobacteriales	Coriobacteriaceae	Slackia	Slackia_equolifaciens
OTU696	20	2	2	86	226	151	116	236	1	17	0	2	71	23	2	26	Firmicutes	Clostridia	Clostridiales	Ruminococcaceae
OTU697	0	0	0	0	0	0	0	0	0	59	131	2	1	0	1	1	Proteobacteria	Epsilonproteobacteria	Campylobacterales	Campylobacteraceae	Campylobacter	Campylobacter_canadensis
OTU698	0	10	0	0	0	0	0	0	0	0	0	0	0	0	0	0	Firmicutes	Clostridia	Clostridiales	Ruminococcaceae
OTU700	0	0	1	4	5	5	6	14	0	0	0	0	0	1	0	4	Firmicutes	Clostridia	Clostridiales	Christensenellaceae
OTU702	0	0	0	0	2	1	2	2	0	0	0	0	0	0	0	0	Firmicutes	Clostridia	Clostridiales	Peptococcaceae	uncultured	uncultured_rumen_bacterium
OTU703	157	8	23	63	84	142	119	51	35	21	9	6	144	500	97	203	Firmicutes	Clostridia	Clostridiales	Ruminococcaceae	uncultured	Clostridium_sp._AUH-JLC235
OTU704	0	20	0	0	0	0	0	0	0	0	0	0	0	0	0	0	Firmicutes	Clostridia	Clostridiales	Ruminococcaceae	Intestinimonas	uncultured_bacterium
OTU706	4	7	0	0	3	4	1	10	0	0	0	0	1	23	0	0	Firmicutes	Clostridia	Clostridiales	Ruminococcaceae
OTU707	1	53	1	2	0	7	2	0	0	0	0	0	1	0	1	0	Bacteroidetes	Bacteroidia	Bacteroidales	Rikenellaceae	Alistipes	uncultured_bacterium
OTU708	3	0	2	3	0	0	3	0	3	0	0	5	0	0	0	0	Firmicutes	Bacilli	Lactobacillales	Lactobacillaceae	Lactobacillus
OTU709	0	0	0	1	0	0	3	0	0	0	0	0	0	0	0	36	Spirochaetae	Spirochaetes	Spirochaetales	Brachyspiraceae	Brachyspira	Brachyspira_pilosicoli
OTU710	76	16	11	383	36	67	177	70	260	531	15	40	670	195	1680	398	Bacteroidetes	Bacteroidia	Bacteroidales	Bacteroidaceae	Bacteroides	Bacteroides_plebeius
OTU711	2	1	0	0	0	0	0	1	1	1	1	3	0	0	0	1	Actinobacteria	Actinobacteria	Micrococcales	Microbacteriaceae
OTU713	13	5	5	21	58	59	8	9	2	0	1	2	0	1	0	2	Firmicutes	Clostridia	Clostridiales	Family_XIII	uncultured	uncultured_bacterium
OTU714	9	87	183	0	0	0	0	0	142	4	312	121	0	0	0	0	Firmicutes	Bacilli	Bacillales	Planococcaceae	Lysinibacillus	Lysinibacillus_sphaericus_C3-41
OTU715	0	35	0	0	0	0	0	0	0	0	0	0	0	0	0	0	Firmicutes	OPB54	no rank	no rank	no rank	uncultured_bacterium
OTU716	0	0	0	3	0	4	3	0	0	0	0	0	0	0	0	0	Tenericutes	Mollicutes	RF9	no rank	no rank
OTU717	80	1	16	254	52	277	190	62	3	3	0	1	0	0	9	1	Bacteroidetes	Bacteroidia	Bacteroidales	Porphyromonadaceae	Parabacteroides	uncultured_bacterium
OTU718	2	1	20	51	41	110	21	9	0	0	0	2	0	0	0	0	Tenericutes	Mollicutes	RF9	no rank	no rank	uncultured_rumen_bacterium
OTU719	0	2	0	0	0	0	0	0	0	0	0	0	0	0	0	0	Bacteroidetes	Cytophagia	Cytophagales	Cytophagaceae	Pseudarcicella	uncultured_bacterium
OTU720	0	58	0	0	0	0	0	0	0	0	0	0	0	0	0	0	Firmicutes	Clostridia	Clostridiales	Christensenellaceae
OTU721	0	0	1	3	9	3	1	15	0	0	0	0	0	3	1	0	Firmicutes	Clostridia	Clostridiales	Family_XIII
OTU722	6	29	4	33	64	19	15	66	1	0	2	0	5	9	2	10	Firmicutes	Clostridia	Clostridiales	Ruminococcaceae	uncultured
OTU723	0	13	0	0	0	0	0	0	0	0	0	0	0	0	0	0	Firmicutes	Clostridia	Clostridiales	Syntrophomonadaceae	Syntrophomonas
OTU724	0	0	0	0	0	0	0	0	4	2	0	1	10	2	14	2	Proteobacteria	Gammaproteobacteria	Aeromonadales	Succinivibrionaceae	Anaerobiospirillum	Anaerobiospirillum_succiniciproducens
OTU725	0	97	0	0	0	0	0	0	0	0	0	0	0	0	0	0	Firmicutes	Clostridia	Clostridiales	Lachnospiraceae	Lachnospira
OTU726	3	0	0	2	1	0	12	26	0	0	0	0	9	1	1	23	Proteobacteria	Gammaproteobacteria	Aeromonadales	Succinivibrionaceae	Succinivibrio
OTU727	3	0	6	13	16	27	7	16	61	4	10	6	9	95	0	23	Firmicutes	Clostridia	Clostridiales	Family_XIII	Incertae_Sedis	uncultured_bacterium
OTU728	324	0	0	0	1	1	0	15	0	74	2	3	79	33	0	11	Bacteroidetes	Bacteroidia	Bacteroidales	Prevotellaceae	Alloprevotella
OTU729	0	1	0	0	0	0	0	17	0	0	0	0	0	0	0	0	Firmicutes	Negativicutes	Selenomonadales	Acidaminococcaceae	Phascolarctobacterium	uncultured_organism
OTU730	0	0	0	0	0	0	0	0	0	0	0	1	0	12	7	31	Bacteroidetes	Bacteroidia	Bacteroidales	Bacteroidaceae	Bacteroides
OTU731	383	5	19	288	426	174	55	188	79	116	1	15	29	12	54	24	Firmicutes	Clostridia	Clostridiales	Ruminococcaceae	Subdoligranulum	uncultured_Subdoligranulum_sp.
OTU732	1	1	2	0	0	0	0	0	63	1	0	3	0	0	2	0	Firmicutes	Erysipelotrichia	Erysipelotrichales	Erysipelotrichaceae	no rank	Streptococcus_pleomorphus_DSM_20574
OTU733	6	0	0	0	1	0	12	0	0	0	0	0	0	8	0	1	Lentisphaerae	Lentisphaeria	Victivallales	Victivallaceae	Victivallis
OTU734	0	24	0	0	0	0	0	0	0	0	0	0	0	0	0	0	Firmicutes	Clostridia	Clostridiales	Ruminococcaceae	Anaerotruncus	Anaerotruncus_sp._G3(2012)
OTU735	30	0	20	30	86	52	37	26	37	1	1	14	0	10	10	4	Firmicutes	Clostridia	Clostridiales	Lachnospiraceae
OTU736	180	4	16	32	42	55	17	24	7	13	8	7	0	17	6	2	Firmicutes	Clostridia	Clostridiales	Lachnospiraceae
OTU737	0	0	0	15	25	62	3	11	1	0	0	0	0	0	0	0	Firmicutes	Clostridia	Clostridiales	Lachnospiraceae	Coprococcus
OTU738	14	1	1	42	16	47	9	14	0	1	0	1	10	23	0	45	Firmicutes	Clostridia	Clostridiales	Ruminococcaceae	uncultured
OTU739	0	0	1	2	0	0	0	1	2	0	1	0	0	3	0	0	Firmicutes	Clostridia	Clostridiales	Family_XIII	Incertae_Sedis	uncultured_bacterium
OTU740	0	0	0	4	0	2	0	0	1	1	0	0	10	0	0	1	Tenericutes	Mollicutes	RF9	no rank	no rank	uncultured_bacterium
OTU741	44	1	9	32	14	77	30	9	8	6	2	0	15	41	12	53	Firmicutes	Clostridia	Clostridiales	Ruminococcaceae	Anaerofilum	uncultured_bacterium
OTU742	47	16	8	21	25	387	29	23	1	0	0	6	3	13	0	12	Bacteroidetes	Bacteroidia	Bacteroidales	Rikenellaceae	RC9_gut_group	uncultured_bacterium
OTU743	4	0	0	18	22	18	26	9	0	0	0	0	0	0	0	0	Bacteroidetes	Bacteroidia	Bacteroidales	Rikenellaceae	Alistipes	uncultured_Alistipes_sp.
OTU744	1	0	1	6	5	7	22	31	0	0	0	0	2	0	0	5	Firmicutes	Clostridia	Clostridiales	Ruminococcaceae
OTU746	13	3	4	7	33	16	6	0	0	0	2	1	0	0	0	0	Firmicutes	Clostridia	Clostridiales	Peptostreptococcaceae
OTU747	7	0	0	12	9	5	10	4	0	0	0	1	0	1	0	1	Firmicutes	Clostridia	Clostridiales	Ruminococcaceae	uncultured
OTU748	0	478	0	0	0	0	0	0	0	0	0	0	0	0	0	0	Bacteroidetes	Bacteroidia	Bacteroidales	Bacteroidaceae	Bacteroides	Bacteroides_acidifaciens
OTU749	0	0	0	0	0	0	0	0	0	2	0	0	7	5	3	6	Proteobacteria	Gammaproteobacteria	Aeromonadales	Succinivibrionaceae	Anaerobiospirillum	uncultured_bacterium
OTU750	0	0	0	6	5	9	2	4	0	1	0	0	1	0	0	0	Firmicutes	Clostridia	Clostridiales	Ruminococcaceae	Incertae_Sedis
OTU751	0	126	0	0	0	0	0	0	0	0	0	0	0	0	0	0	Bacteroidetes	Bacteroidia	Bacteroidales	S24-7	no rank	uncultured_bacterium
OTU752	0	0	2	0	0	0	0	0	0	0	0	0	0	0	0	0	Firmicutes	Clostridia	Clostridiales	Lachnospiraceae	Cellulosilyticum	uncultured_bacterium
OTU753	0	115	0	0	0	0	0	0	0	0	0	0	0	0	0	0	Firmicutes	Clostridia	Clostridiales	Lachnospiraceae	uncultured
OTU754	10	0	2	20	8	7	37	6	0	0	0	2	0	1	0	1	Proteobacteria	Betaproteobacteria	Burkholderiales	Alcaligenaceae	Sutterella	Parasutterella_secunda
OTU755	1	0	2	2	3	2	1	1	0	0	0	0	0	0	0	0	Firmicutes	Clostridia	Clostridiales	Ruminococcaceae
OTU756	10	3	3	154	55	34	11	96	0	25	12	94	12	762	8	418	Verrucomicrobia	Verrucomicrobiae	Verrucomicrobiales	Verrucomicrobiaceae	Akkermansia	uncultured_bacterium
OTU757	0	0	0	0	0	0	0	0	0	0	0	4	0	0	0	0	Bacteroidetes	Sphingobacteriia	Sphingobacteriales	Chitinophagaceae	uncultured
OTU758	0	0	0	1	2	7	1	11	0	0	0	0	0	0	0	0	Firmicutes	Clostridia	Clostridiales	Christensenellaceae	uncultured	uncultured_Clostridiaceae_bacterium
OTU759	0	0	0	6	15	2	3	10	0	0	0	0	0	1	0	1	Firmicutes	Clostridia	Clostridiales	Ruminococcaceae	Anaerotruncus	uncultured_Firmicutes_bacterium
OTU760	9	2	10	31	5	60	51	16	0	0	0	0	0	0	0	0	Firmicutes	Clostridia	Clostridiales	Lachnospiraceae
OTU761	3	0	1	10	2	17	4	8	1	0	0	0	0	1	0	0	Tenericutes	Mollicutes	RF9	no rank	no rank	uncultured_bacterium
OTU762	4	0	1	8	7	7	18	2	3	0	0	4	2	19	2	5	Bacteroidetes	Bacteroidia	Bacteroidales	Rikenellaceae	RC9_gut_group
OTU763	1	0	0	0	1	0	0	0	0	0	0	0	0	0	0	0	Spirochaetae	Spirochaetes	Spirochaetales	Spirochaetaceae	Spirochaeta
OTU765	0	0	0	1	1	1	0	4	0	0	0	0	0	1	0	0	Firmicutes	Clostridia	Clostridiales	Ruminococcaceae
OTU766	0	0	0	1	1	1	0	48	0	0	0	0	0	5	0	4	Cyanobacteria	Cyanobacteria	Gastranaerophilales	no rank	no rank	uncultured_rumen_bacterium
OTU767	2	0	0	13	14	10	3	17	0	0	0	0	0	0	0	0	Firmicutes	Clostridia	Clostridiales	Defluviitaleaceae	uncultured	uncultured_bacterium
OTU768	1	0	0	2	6	1	2	4	0	0	0	0	1	5	1	3	Firmicutes	Clostridia	Clostridiales	Ruminococcaceae	Anaerofilum	uncultured_bacterium
OTU770	6	1	2	36	72	17	38	14	0	0	1	0	0	152	0	0	Synergistetes	Synergistia	Synergistales	Synergistaceae	Synergistes	uncultured_organism
OTU771	0	0	0	0	0	0	0	0	0	0	0	1	0	0	367	7	Deferribacteres	Deferribacteres	Deferribacterales	Deferribacteraceae	Mucispirillum
OTU772	0	0	1	0	0	0	0	0	0	0	6	9	0	1	0	0	Actinobacteria	Actinobacteria	Corynebacteriales	Dietziaceae	Dietzia	Dietzia_maris
OTU773	0	0	1	18	44	13	20	6	0	0	0	0	0	0	0	0	Firmicutes	Clostridia	Clostridiales	Ruminococcaceae	uncultured
OTU774	1	0	0	6	0	5	2	7	0	0	0	0	0	0	0	0	Firmicutes	Clostridia	Clostridiales	Lachnospiraceae	Lachnospira
OTU775	31	1	3	1	12	15	0	3	291	236	26	34	116	25	428	40	Firmicutes	Clostridia	Clostridiales	Ruminococcaceae	Butyricicoccus	Butyricicoccus_pullicaecorum
OTU776	3	106	311	0	0	0	0	0	134	1	15	103	0	0	2	0	Firmicutes	Bacilli	Bacillales	Planococcaceae	Solibacillus	Solibacillus_silvestris_StLB046
OTU777	0	0	0	1	1	0	9	0	0	0	0	0	0	0	0	0	Firmicutes
OTU778	0	0	1	0	0	0	0	0	1701	2448	92	4	389	51	0	67	Firmicutes	Clostridia	Clostridiales	Peptostreptococcaceae
OTU779	0	0	0	19	0	15	5	7	2	0	1	1	0	37	1	8	Firmicutes	Clostridia	Clostridiales	Ruminococcaceae	uncultured
OTU780	0	21	0	0	0	0	0	0	0	0	0	0	0	0	0	0	Bacteroidetes	Bacteroidia	Bacteroidales	S24-7	no rank	uncultured_Bacteroidales_bacterium
OTU781	0	107	0	0	0	0	0	0	0	0	0	0	0	0	0	0	Firmicutes	Clostridia	Clostridiales	Lachnospiraceae	Blautia
OTU782	68	6	14	174	266	93	98	447	8	4	0	12	6	60	1	38	Firmicutes	Clostridia	Clostridiales	Ruminococcaceae	uncultured
OTU783	0	23	0	0	0	0	0	0	0	0	0	0	0	0	0	0	Bacteroidetes	Bacteroidia	Bacteroidales	Prevotellaceae	Paraprevotella
OTU784	1	8	14	0	0	0	0	0	7	0	0	13	0	0	0	0	Firmicutes	Bacilli	Bacillales	Bacillaceae	Oceanobacillus	Oceanobacillus_profundus
OTU785	0	0	1	6	26	2	24	3	0	1	0	0	2	1	0	0	Cyanobacteria	Cyanobacteria	Gastranaerophilales	no rank	no rank	uncultured_bacterium
OTU787	0	0	0	0	0	0	0	3	0	0	0	0	0	0	0	0	Firmicutes	Clostridia	Clostridiales
OTU788	0	0	0	0	0	0	0	3	2	0	1	5	0	1	1	14	Firmicutes	Clostridia	Clostridiales	Ruminococcaceae	Incertae_Sedis
OTU789	0	4	40	0	2	2	0	0	2	1	3	5	1	0	0	0	Firmicutes	Bacilli	Lactobacillales	Streptococcaceae	Streptococcus	Streptococcus_gallolyticus_subsp._macedonicus
OTU790	0	0	0	13	0	9	4	1	0	0	0	0	0	10	0	0	Firmicutes	Clostridia	Clostridiales	Lachnospiraceae	Butyrivibrio	uncultured_organism
OTU791	0	7	11	0	0	0	0	0	11	0	0	3	0	0	0	1	Firmicutes	Bacilli	Bacillales	Paenibacillaceae	Paenibacillus	Paenibacillus_amylolyticus
OTU792	2	0	0	0	0	1	1	0	1	0	0	0	0	0	0	2	Bacteroidetes	Bacteroidia	Bacteroidales	Rikenellaceae	Alistipes
OTU793	0	0	2	3	0	6	3	1	0	0	0	3	0	0	0	0	Firmicutes	Bacilli	Lactobacillales	Leuconostocaceae	Weissella	Weissella_paramesenteroides
OTU794	0	7	0	0	0	0	0	0	0	0	0	0	0	0	0	0	Bacteroidetes	Bacteroidia	Bacteroidales	Bacteroidaceae	Bacteroides	Bacteroides_thetaiotaomicron
OTU795	72	3	47	113	171	225	71	114	22	14	11	14	45	88	22	19	Firmicutes	Clostridia	Clostridiales	Ruminococcaceae	Incertae_Sedis
OTU796	0	1	0	4	2	15	8	6	4	0	0	0	0	6	0	0	Bacteroidetes	Bacteroidia	Bacteroidales	Rikenellaceae	Alistipes	uncultured_bacterium
OTU797	71	1	1	42	21	107	367	12	0	0	0	0	0	0	0	0	Bacteroidetes	Bacteroidia	Bacteroidales	Prevotellaceae	uncultured	uncultured_bacterium
OTU798	0	0	15	0	0	0	0	0	1	1	10	9	1	4	0	6	Firmicutes	Bacilli	Bacillales	Staphylococcaceae	Staphylococcus	Staphylococcus_equorum
OTU799	0	29	0	0	0	0	0	0	0	0	0	0	0	0	0	0	Firmicutes	Clostridia	Clostridiales	Clostridiaceae_1	Fonticella
OTU800	0	41	0	0	0	0	0	0	0	0	0	0	0	0	0	0	Firmicutes	Clostridia	Clostridiales	Ruminococcaceae
OTU801	2	0	1	1	9	0	0	4	0	0	0	0	0	2	0	4	Firmicutes	Clostridia	Clostridiales	Ruminococcaceae
OTU802	2	0	3	8	10	14	9	7	0	1	0	3	3	3	4	9	Bacteroidetes	Bacteroidia	Bacteroidales	Rikenellaceae	Alistipes
OTU803	3	1	0	18	7	9	15	29	1	0	0	0	3	12	7	13	Firmicutes	Clostridia	Clostridiales	Ruminococcaceae	Oscillospira	uncultured_bacterium
OTU804	0	0	0	0	0	0	0	0	0	1	0	0	0	15	1	12	Bacteroidetes	Bacteroidia	Bacteroidales
OTU805	100	1	11	237	322	97	80	211	1	5	0	5	25	25	1	16	Firmicutes	Clostridia	Clostridiales	Ruminococcaceae	Anaerotruncus	uncultured_organism
OTU806	0	10	3	0	0	0	0	6	0	0	0	1	0	0	0	0	Proteobacteria	Betaproteobacteria	Burkholderiales	Alcaligenaceae	Parasutterella	uncultured_organism
OTU807	0	0	2	23	0	0	0	0	0	0	0	0	0	0	0	0	Firmicutes	Clostridia	Clostridiales	Clostridiaceae_1	Candidatus_Arthromitus	uncultured_bacterium
OTU809	0	34	0	0	0	0	0	0	0	0	0	0	0	0	0	0	Firmicutes	Clostridia	Clostridiales	Ruminococcaceae	Incertae_Sedis	iron-reducing_bacterium_enrichment_culture_clone_HN-HFO106
OTU810	0	0	0	16	11	3	8	12	0	0	0	0	0	1	0	0	Firmicutes	Clostridia	Clostridiales	Ruminococcaceae
OTU811	71	0	7	18	34	18	110	13	0	5	0	0	1	7	1	8	Bacteroidetes	Bacteroidia	Bacteroidales	Prevotellaceae	uncultured	uncultured_bacterium
OTU812	5	0	5	5	0	4	15	0	1	0	0	0	0	0	0	0	Firmicutes	Bacilli	Lactobacillales	Lactobacillaceae	Lactobacillus	Lactobacillus_brevis
OTU813	0	0	0	0	0	0	0	0	0	0	0	108	1	0	0	0	Firmicutes	Bacilli	Bacillales	Staphylococcaceae	Macrococcus	Macrococcus_caseolyticus
OTU814	0	0	0	9	42	6	24	23	0	0	0	0	0	0	0	0	Firmicutes	Clostridia	Clostridiales	Christensenellaceae	uncultured
OTU816	0	22	0	4	0	1	12	0	0	0	0	0	0	1	0	0	Proteobacteria	Alphaproteobacteria	Rhodospirillales	Rhodospirillaceae	Thalassospira	uncultured_bacterium
OTU817	27	7	43	10	17	61	11	8	0	0	0	1	0	0	0	0	Firmicutes	Erysipelotrichia	Erysipelotrichales	Erysipelotrichaceae	uncultured
OTU818	0	0	0	3	0	3	3	2	0	0	0	0	0	0	0	0	Bacteroidetes	Bacteroidia	Bacteroidales	Rikenellaceae	Rikenella	uncultured_bacterium
OTU819	0	0	1	0	0	0	0	0	0	0	0	11	0	0	0	0	Proteobacteria	Alphaproteobacteria	Rhodobacterales	Rhodobacteraceae	Paracoccus
OTU820	618	22	79	71	355	36	90	440	12	310	13	1	424	73	5	632	Firmicutes	Negativicutes	Selenomonadales	Veillonellaceae	Megamonas
OTU821	0	0	15	0	0	0	0	0	0	0	0	0	0	0	0	0	Firmicutes	Bacilli	Lactobacillales	Streptococcaceae	Streptococcus	Streptococcus_ferus
OTU822	0	0	19	0	0	0	0	0	0	0	0	0	0	0	0	0	Firmicutes	Bacilli	Lactobacillales	Streptococcaceae	Streptococcus
OTU823	33	6	2	85	216	81	79	259	3	7	1	0	48	134	26	128	Firmicutes	Clostridia	Clostridiales	Ruminococcaceae	Oscillospira	uncultured_bacterium
OTU824	2	1	2	2	0	20	3	1	0	0	0	0	0	0	0	0	Firmicutes	Clostridia	Clostridiales	Lachnospiraceae
OTU825	2	2	0	2	1	5	3	0	0	0	0	0	0	0	0	0	Proteobacteria	Betaproteobacteria	Burkholderiales	Oxalobacteraceae	Oxalobacter	uncultured_bacterium
OTU826	3297	140	15132	164	19	30	58	28	5895	1721	24005	16733	11	124	19	62	Firmicutes	Clostridia	Clostridiales	Peptostreptococcaceae	Incertae_Sedis	uncultured_Peptostreptococcaceae_bacterium
OTU827	0	0	0	15	4	0	18	2	2	17	0	1	36	0	9	10	Bacteroidetes	Bacteroidia	Bacteroidales	Bacteroidaceae	Bacteroides	uncultured_bacterium
OTU828	0	24	0	0	0	0	0	0	0	0	0	0	0	0	0	0	Firmicutes	Clostridia	Clostridiales	Ruminococcaceae	uncultured
OTU829	118	0	2	68	136	49	33	137	3	26	1	2	18	13	2	108	Firmicutes	Clostridia	Clostridiales	Ruminococcaceae	Faecalibacterium
OTU830	0	3	4	106	51	62	1409	3	3	15	0	0	6	2	5	38	Bacteroidetes	Bacteroidia	Bacteroidales	Rikenellaceae	RC9_gut_group	uncultured_bacterium
OTU831	0	0	0	0	0	0	0	0	0	0	16	0	0	0	0	0	Firmicutes	Bacilli	Bacillales	Paenibacillaceae	Paenibacillus
OTU832	8	0	0	24	0	0	0	0	12	4	382	29	4	0	0	0	Firmicutes	Clostridia	Clostridiales	Clostridiaceae_1	Clostridium_sensu_stricto_1	Clostridium_perfringens_NCTC_8239
OTU833	13	1	1	1	2	7	3	0	11	0	4	1	0	3	0	5	Firmicutes	Clostridia	Clostridiales	Peptococcaceae	Peptococcus	uncultured_bacterium
OTU834	0	2	0	0	0	0	0	0	2	0	0	0	0	0	0	0	Actinobacteria	Acidimicrobiia	Acidimicrobiales	Acidimicrobiaceae	CL500-29_marine_group	uncultured_bacterium
OTU835	0	0	1	1	2	2	3	0	0	0	0	0	0	0	0	0	Firmicutes	Clostridia	Clostridiales	Ruminococcaceae	Anaerotruncus	uncultured_bacterium
OTU836	0	0	0	4	6	4	2	1	0	0	0	0	0	1	0	2	Firmicutes	Clostridia	Clostridiales	Ruminococcaceae	uncultured
OTU837	0	0	2	0	1	0	2	0	6	0	0	0	0	0	0	0	Cyanobacteria	Cyanobacteria	Gastranaerophilales	no rank	no rank	uncultured_bacterium
OTU838	3	0	0	6	1	1	1	2	0	1	1	0	1	0	0	3	Firmicutes	Clostridia	Clostridiales	Christensenellaceae	uncultured
OTU839	0	0	0	0	0	0	0	0	0	0	0	0	0	2	0	0	Firmicutes	Clostridia	Clostridiales	Lachnospiraceae
OTU840	1	0	0	6	2	2	5	12	0	0	0	0	0	0	0	2	Firmicutes	Clostridia	Clostridiales	Ruminococcaceae	Anaerotruncus	uncultured_bacterium
OTU841	0	60	0	0	0	0	0	0	0	0	0	0	0	0	0	0	Bacteroidetes	Bacteroidia	Bacteroidales	Rikenellaceae	RC9_gut_group	uncultured_organism
OTU842	0	0	0	2	2	3	0	3	0	0	0	0	0	0	0	2	Firmicutes	Clostridia	Clostridiales	Ruminococcaceae
OTU843	0	0	0	3	2	0	2	4	5	2	1	7	5	19	4	7	Firmicutes	Clostridia	Clostridiales	Ruminococcaceae	Incertae_Sedis
OTU844	0	8	0	0	0	0	0	0	0	0	0	1	0	0	0	0	Proteobacteria	Betaproteobacteria	Rhodocyclales	Rhodocyclaceae	Thauera	Thauera_sp._MZ1T
OTU845	1	9	5	0	1	0	0	0	4	1	1	4	0	2	0	0	Firmicutes	Bacilli	Lactobacillales	Lactobacillaceae	Lactobacillus
OTU847	0	0	1	0	0	0	0	0	0	0	1	0	0	0	0	0	Bacteroidetes	Flavobacteriia	Flavobacteriales	Flavobacteriaceae	Myroides
OTU848	0	0	0	0	0	0	0	0	0	0	11	1	0	3	0	0	Firmicutes	Bacilli	Lactobacillales	Lactobacillaceae	Lactobacillus
OTU849	0	0	0	0	0	0	0	0	2	0	1	0	0	7	0	5	Firmicutes	Clostridia	Clostridiales	Lachnospiraceae	Oribacterium
OTU850	0	0	0	1	3	1	0	1	0	0	0	0	0	1	0	0	Firmicutes	Clostridia	Clostridiales	Christensenellaceae	Christensenella
OTU851	12	0	0	56	4	18	40	7	0	0	0	0	0	8	0	8	Bacteroidetes	Bacteroidia	Bacteroidales	Porphyromonadaceae	uncultured	uncultured_organism
OTU852	0	0	0	11	5	6	6	22	0	0	0	0	0	1	0	0	Firmicutes	Clostridia	Clostridiales	Ruminococcaceae
OTU855	0	0	0	0	0	0	0	0	3	0	4	0	0	16	0	11	Firmicutes	Clostridia	Clostridiales	Peptococcaceae	Peptococcus	uncultured_bacterium
OTU856	0	4	0	0	0	0	0	0	0	0	0	0	0	0	0	0	Firmicutes	Clostridia	Clostridiales	Clostridiaceae_1	Clostridium_sensu_stricto_7
OTU857	0	4	0	0	0	0	0	0	0	0	0	0	0	0	0	0	Firmicutes	Clostridia	Clostridiales	Lachnospiraceae
OTU858	5824	7	71	88	359	151	676	290	6	22	0	1	35	5	2	57	Bacteroidetes	Bacteroidia	Bacteroidales	Prevotellaceae	uncultured	uncultured_organism
OTU859	3	4	2	13	10	20	4	12	0	2	0	3	1	0	0	0	Firmicutes	Clostridia	Clostridiales	Lachnospiraceae	Blautia
OTU860	0	95	0	0	0	0	0	0	0	0	0	0	0	0	0	0	Proteobacteria	Betaproteobacteria	Burkholderiales	Alcaligenaceae	Parasutterella	uncultured_bacterium
OTU861	0	20	0	0	0	0	0	0	0	0	0	0	0	0	0	0	Bacteroidetes	Bacteroidia	Bacteroidales	Rikenellaceae	RC9_gut_group	uncultured_bacterium
OTU862	0	0	1	4	6	3	2	3	2	0	0	0	0	0	0	1	Firmicutes	Clostridia	Clostridiales	Ruminococcaceae
OTU863	0	169	0	0	0	0	0	0	0	0	0	0	0	0	0	0	Bacteroidetes	Bacteroidia	Bacteroidales	S24-7	no rank	uncultured_bacterium
OTU864	0	0	0	0	0	0	0	0	4	0	0	0	0	3	0	9	Firmicutes	Clostridia	Clostridiales	Family_XIII	Incertae_Sedis	uncultured_bacterium
OTU865	0	0	0	0	0	0	0	0	0	0	0	0	0	3	0	2	Proteobacteria	Gammaproteobacteria	Aeromonadales	Succinivibrionaceae	Anaerobiospirillum
OTU866	0	2	8	0	0	0	0	0	5	1	0	2	0	0	0	0	Firmicutes	Bacilli	Lactobacillales	Streptococcaceae	Streptococcus	Streptococcus_parauberis
OTU867	0	0	1	2	4	1	1	2	0	2	0	0	4	6	0	2	Tenericutes	Mollicutes	RF9	no rank	no rank	uncultured_bacterium
OTU868	0	0	0	2	2	1	0	1	0	0	0	0	1	13	1	5	Firmicutes	Clostridia	Clostridiales	Ruminococcaceae
OTU869	0	0	0	0	2	41	0	0	0	0	0	0	0	0	0	0	Bacteroidetes	Bacteroidia	Bacteroidales	Porphyromonadaceae	Parabacteroides
OTU871	0	131	0	0	0	0	0	0	0	0	0	0	0	0	0	0	Candidate_division_WS6	no rank	no rank	no rank	no rank	toluene-degrading_methanogenic_consortium_bacterium
OTU872	0	0	0	3	0	0	1	0	0	41	0	0	120	41	21	40	Bacteroidetes	Bacteroidia	Bacteroidales	Bacteroidaceae	Bacteroides	uncultured_bacterium
OTU873	1	0	0	0	1	0	0	0	2	0	16	7	0	1	0	6	Actinobacteria	Actinobacteria	Micrococcales	Brevibacteriaceae	Brevibacterium	Brevibacterium_iodinum
OTU874	0	2	0	0	0	0	0	0	0	0	1	5	0	205	0	0	SHA-109	no rank	no rank	no rank	no rank	uncultured_bacterium
OTU875	1	0	0	0	0	3	1	0	0	0	0	0	1	2	3	4	Firmicutes	Clostridia	Clostridiales	vadinBB60	no rank	Clostridiales_bacterium_enrichment_culture_clone_06-1235251-76
OTU876	0	379	0	0	0	0	0	0	0	0	0	0	0	0	0	0	Firmicutes	Clostridia	Clostridiales	Ruminococcaceae	Oscillibacter	uncultured_bacterium
OTU877	0	2	0	0	0	0	0	0	0	1	0	0	0	1	0	0	Actinobacteria	Actinobacteria	Corynebacteriales	Mycobacteriaceae	Mycobacterium
OTU879	20	265	4	64	77	65	94	103	22	4	6	5	104	225	20	173	Firmicutes	Clostridia	Clostridiales	Ruminococcaceae
OTU880	0	0	0	0	0	0	0	0	1	7	0	0	44	1	12	11	Bacteroidetes	Bacteroidia	Bacteroidales	Rikenellaceae	RC9_gut_group	uncultured_bacterium
OTU881	9	1	1	0	1	63	1	2	2	13	0	0	26	0	50	9	Bacteroidetes	Bacteroidia	Bacteroidales	Bacteroidaceae	Bacteroides
OTU882	0	6	12	3	38	46	0	4	0	0	0	0	1	0	0	10	Firmicutes	Clostridia	Clostridiales	Ruminococcaceae	uncultured
OTU883	1	44	2	0	0	1	0	1	0	0	2	6	7	0	0	0	Proteobacteria	Gammaproteobacteria	Enterobacteriales	Enterobacteriaceae
OTU884	8	0	6	0	4	1	1	0	0	0	139	6	0	0	0	0	Firmicutes	Clostridia	Clostridiales	Peptostreptococcaceae	Incertae_Sedis
OTU885	0	0	0	0	0	0	0	0	4	0	0	0	0	2	0	1	Bacteroidetes	Bacteroidia	Bacteroidales	Rikenellaceae	Rikenella	uncultured_bacterium
OTU886	0	0	20	0	0	0	0	0	0	0	1	1	0	1	0	1	Firmicutes	Bacilli	Lactobacillales	Streptococcaceae	Streptococcus
OTU887	2	1	6	0	0	0	0	0	4	0	3	4	0	1	0	0	Firmicutes	Bacilli	Bacillales	Listeriaceae	Brochothrix	Brochothrix_thermosphacta
OTU888	1	0	0	15	28	10	4	14	0	0	0	0	0	0	0	0	Firmicutes	Clostridia	Clostridiales	Family_XIII	uncultured	uncultured_organism
OTU891	15	2	1	26	8	59	38	12	5	9	0	3	47	45	7	22	Firmicutes	Clostridia	Clostridiales	Ruminococcaceae
OTU893	0	2	2	50	9	32	15	22	0	0	0	0	0	0	0	0	Firmicutes	Clostridia	Clostridiales	Ruminococcaceae	uncultured	unidentified_rumen_bacterium_RFN25
OTU894	31	6	4	91	25	284	100	9	18	47	3	55	88	446	549	358	Bacteroidetes	Bacteroidia	Bacteroidales	Bacteroidaceae	Bacteroides	uncultured_bacterium
OTU895	30	2	3	26	0	2	39	0	0	0	0	1	1	0	0	0	Firmicutes	Bacilli	Lactobacillales	Lactobacillaceae	Lactobacillus	Lactobacillus_mucosae
OTU897	59	1	15	21	31	24	24	9	355	162	2	6	35	0	12	9	Firmicutes	Clostridia	Clostridiales	Lachnospiraceae	uncultured
OTU898	0	272	0	0	0	0	0	0	0	0	0	0	0	0	0	0	Firmicutes	Clostridia	Clostridiales	Ruminococcaceae	Incertae_Sedis
OTU899	7	7	0	141	108	205	72	90	11	28	39	49	84	855	8	3	Proteobacteria	Deltaproteobacteria	Desulfovibrionales	Desulfovibrionaceae	Desulfovibrio	Desulfovibrio_piger
OTU900	0	6	0	0	0	0	0	0	0	0	0	0	0	0	0	0	Bacteroidetes	Bacteroidia	Bacteroidales
OTU901	18	1	1	14	0	63	103	3	10	3	2	0	45	51	24	40	Firmicutes	Clostridia	Clostridiales	Ruminococcaceae	Flavonifractor	uncultured_bacterium
OTU902	1	0	0	4	0	14	8	2	0	0	0	0	0	4	0	5	Firmicutes	Clostridia	Clostridiales	vadinBB60	no rank
OTU903	2	0	2	0	0	0	0	0	28	77	8	40	176	160	310	103	Bacteroidetes	Bacteroidia	Bacteroidales	Porphyromonadaceae	Parabacteroides	uncultured_bacterium
OTU904	0	52	0	0	0	0	0	0	0	0	0	0	0	0	0	0	Firmicutes	Clostridia	Clostridiales	Lachnospiraceae	uncultured	uncultured_bacterium
OTU905	0	414	0	0	0	0	0	0	0	0	0	0	0	0	0	0	Firmicutes	Clostridia	Clostridiales	Ruminococcaceae	Acetanaerobacterium	Acetanaerobacterium_elongatum
OTU906	0	26	0	0	0	0	0	0	0	0	0	0	0	0	0	0	Firmicutes	Clostridia	Clostridiales	Lachnospiraceae
OTU907	0	19	0	0	0	0	0	0	0	0	0	0	0	0	0	0	Firmicutes	Negativicutes	Selenomonadales	Acidaminococcaceae	uncultured	uncultured_bacterium
OTU908	36	12	10	1	1	0	1	53	12	7	54	16	0	0	0	0	Proteobacteria	Gammaproteobacteria	Pseudomonadales	Pseudomonadaceae	Pseudomonas
OTU909	0	1474	0	0	0	0	0	0	0	0	0	0	0	0	0	0	Bacteroidetes	Bacteroidia	Bacteroidales	Bacteroidaceae	Bacteroides	Bacteroides_graminisolvens
OTU911	1	162	0	0	0	0	0	0	0	0	0	0	0	0	0	0	Bacteroidetes	Bacteroidia	Bacteroidales	Porphyromonadaceae	Parabacteroides	Parabacteroides_distasonis
OTU912	0	0	3	1	4	0	1	5	0	0	0	0	0	3	0	2	Cyanobacteria	Cyanobacteria	Gastranaerophilales	no rank	no rank
OTU914	0	0	15	0	82	0	0	0	0	0	0	0	0	0	0	0	Bacteroidetes	Bacteroidia	Bacteroidales	S24-7	no rank	uncultured_bacterium
OTU915	338	3	13	35	103	211	261	0	4	1	0	0	0	8	0	80	Bacteroidetes	Bacteroidia	Bacteroidales	Rikenellaceae	RC9_gut_group	uncultured_bacterium
OTU916	13	0	0	15	45	12	13	10	3	6	0	0	1	18	8	33	Firmicutes	Clostridia	Clostridiales	Ruminococcaceae
OTU917	0	0	0	0	0	0	0	0	1	0	1	0	0	19	0	20	Bacteroidetes	Bacteroidia	Bacteroidales	Bacteroidaceae	Bacteroides
OTU918	0	0	0	0	0	0	0	0	0	0	0	0	0	0	11	0	Firmicutes	Clostridia	Clostridiales	Ruminococcaceae	uncultured	Eubacterium_coprostanoligenes
OTU919	12	4	1	71	17	0	138	8	48	58	4	11	30	54	191	192	Bacteroidetes	Bacteroidia	Bacteroidales	Bacteroidaceae	Bacteroides	Bacteroides_coprophilus
OTU920	6	0	2	6	1	3	7	1	1	2	0	0	1	4	10	4	Firmicutes	Clostridia	Clostridiales	vadinBB60	no rank	uncultured_bacterium
OTU921	0	0	1	0	0	0	0	0	0	0	0	3	0	0	0	0	Cyanobacteria	Cyanobacteria	SubsectionII	FamilyII	Chroococcidiopsis	Chroococcidiopsis_thermalis_PCC_7203
OTU922	0	0	1	7	5	6	4	8	0	0	0	0	1	5	0	0	Firmicutes	Clostridia	Clostridiales	Family_XIII	uncultured
OTU923	2	0	0	0	0	0	0	0	0	0	4	0	0	0	0	0	Actinobacteria	Actinobacteria	Frankiales	Frankiaceae	Jatrophihabitans
OTU924	13	2	2	17	21	35	9	3	0	0	1	2	0	6	0	3	Firmicutes	Clostridia	Clostridiales	Lachnospiraceae	Shuttleworthia	uncultured_bacterium
OTU925	0	164	0	0	0	0	0	0	0	0	0	0	0	0	0	0	Bacteroidetes	Bacteroidia	Bacteroidales	Porphyromonadaceae	Parabacteroides	Parabacteroides_goldsteinii
OTU926	1	0	26	0	1	0	1	0	3	1	35	3	1	0	0	1	Firmicutes	Bacilli	Lactobacillales	Enterococcaceae	Enterococcus	Enterococcus_cecorum_DSM_20682_=_ATCC_43198
OTU927	60	1	0	14	2	28	11	2	2	2	0	1	28	0	315	36	Firmicutes	Clostridia	Clostridiales	Ruminococcaceae	Anaerofilum	uncultured_bacterium
OTU928	0	52	0	0	0	0	0	0	0	0	0	0	0	0	0	0	Firmicutes	Clostridia	Clostridiales	Ruminococcaceae	Ruminococcus	Ruminococcus_flavefaciens
OTU929	1	0	0	0	0	0	0	0	0	0	0	0	0	0	1	8	Bacteroidetes	Bacteroidia	Bacteroidales	Rikenellaceae	RC9_gut_group
OTU930	0	3	0	0	0	0	0	0	3	0	0	0	0	0	0	4	Firmicutes	Clostridia	Clostridiales	Lachnospiraceae
OTU931	0	0	0	0	0	0	0	0	3	0	0	5	0	0	0	0	Proteobacteria	Alphaproteobacteria	Sphingomonadales	Sphingomonadaceae	Sphingomonas
OTU932	66	0	12	185	34	6	209	7	3	0	0	0	0	1	0	0	Bacteroidetes	Bacteroidia	Bacteroidales	S24-7	no rank	uncultured_bacterium
OTU933	13	0	6	21	50	40	68	80	0	0	0	0	0	16	8	0	Firmicutes	Clostridia	Clostridiales	Ruminococcaceae
OTU934	0	0	0	25	0	0	0	0	0	0	0	0	0	0	0	0	Proteobacteria	Deltaproteobacteria	Desulfovibrionales	Desulfovibrionaceae	Lawsonia	Lawsonia_intracellularis
OTU935	0	0	0	0	0	0	0	0	1	0	0	1	0	0	0	0	Actinobacteria	Actinobacteria	Propionibacteriales	Nocardioidaceae	Nocardioides	uncultured_actinobacterium
OTU936	0	0	0	0	0	0	0	0	0	55	0	2	100	0	418	5	Bacteroidetes	Bacteroidia	Bacteroidales	Bacteroidaceae	Bacteroides
OTU938	0	0	0	0	0	0	0	0	1	0	4	21	0	0	0	0	Firmicutes	Bacilli	Bacillales	Planococcaceae	Planococcus
OTU939	24	6	6	42	27	84	36	17	3	2	0	1	13	8	7	8	Bacteroidetes	Bacteroidia	Bacteroidales	Rikenellaceae	Alistipes	uncultured_bacterium
OTU940	0	9	0	0	0	0	0	0	0	0	0	0	0	0	0	0	Bacteroidetes	Sphingobacteriia	Sphingobacteriales	WCHB1-69	no rank	bacterium_enrichment_culture_clone_R4-52B
OTU941	0	0	0	0	0	0	0	0	13	2	1	5	1	0	0	3	Firmicutes	Erysipelotrichia	Erysipelotrichales	Erysipelotrichaceae	Solobacterium
OTU942	0	0	0	0	0	0	0	0	10	10	0	4	7	8	11	10	Firmicutes	Clostridia	Clostridiales	Ruminococcaceae	Anaerotruncus	uncultured_bacterium
OTU943	0	0	0	0	0	0	0	0	0	0	0	0	0	1	0	12	Proteobacteria
OTU944	1474	61	160	310	44	1059	154	27	62	135	7	33	770	471	1048	310	Firmicutes	Clostridia	Clostridiales	Ruminococcaceae	Faecalibacterium	uncultured_bacterium
OTU945	7	17	3	60	76	30	37	95	1	2	0	0	6	33	4	31	Firmicutes	Clostridia	Clostridiales	Ruminococcaceae	Oscillibacter	Oscillibacter_ruminantium_GH1
OTU946	0	0	0	1	0	0	1	0	0	0	0	0	0	0	0	0	Firmicutes	Erysipelotrichia	Erysipelotrichales	Erysipelotrichaceae
OTU947	0	3	0	3	0	3	1	4	0	0	0	0	0	0	0	0	Firmicutes	Clostridia	Clostridiales	Ruminococcaceae	uncultured	uncultured_rumen_bacterium_4C28d-12
OTU948	0	43	0	0	0	0	0	0	0	0	0	0	0	0	0	0	Firmicutes	Clostridia	Clostridiales	Ruminococcaceae
OTU949	6	18	1	0	0	0	0	0	328	830	2	68	2416	270	3416	1452	Bacteroidetes	Bacteroidia	Bacteroidales	Bacteroidaceae	Bacteroides	uncultured_bacterium
OTU950	11	0	9	93	83	29	27	245	2	0	1	0	0	3	0	9	Firmicutes	Clostridia	Clostridiales	Ruminococcaceae
OTU951	0	0	0	0	0	0	0	0	0	0	0	0	0	16	0	2	Spirochaetae	Spirochaetes	Spirochaetales	Spirochaetaceae	Spirochaeta
OTU952	2	5	1	1	2	0	0	1	48	50	12	11	23	12	2	48	Firmicutes	Clostridia	Clostridiales	Lachnospiraceae	Blautia	bacterium_ic1272
OTU953	11	4	2	64	55	32	16	125	7	5	1	0	2	21	0	30	Firmicutes	Clostridia	Clostridiales	Lachnospiraceae	Coprococcus
OTU954	14	0	9	1	2	6	1	0	33	4	1	0	13	0	0	0	Firmicutes	Erysipelotrichia	Erysipelotrichales	Erysipelotrichaceae	uncultured
OTU955	2	0	1	20	3	19	1	6	0	0	0	0	0	5	0	25	Firmicutes	Clostridia	Clostridiales	Ruminococcaceae	uncultured
OTU956	0	0	1	0	0	0	0	0	0	0	12	21	0	6	0	5	Actinobacteria	Actinobacteria	Micrococcales	Dermabacteraceae	Brachybacterium
OTU957	0	11	0	0	0	0	0	0	0	0	0	0	0	0	0	0	Bacteroidetes	vadinHA17	no rank	no rank	no rank	uncultured_bacterium
OTU958	0	0	0	6	4	6	4	0	0	0	0	0	0	0	0	0	Firmicutes	Clostridia	Clostridiales	vadinBB60	no rank	uncultured_bacterium
OTU959	0	0	0	3	2	0	2	5	0	0	0	0	1	0	0	0	Firmicutes	Clostridia	Clostridiales	Ruminococcaceae
OTU960	11	0	23	959	723	1019	108	270	2	0	0	3	0	18	0	18	Firmicutes	Clostridia	Clostridiales	Ruminococcaceae	uncultured	human_gut_metagenome
OTU961	0	0	0	0	0	0	0	0	0	23	0	0	16	0	1	1	Bacteroidetes
OTU962	27	0	10	31	17	46	24	7	0	0	0	2	0	0	0	0	Firmicutes	Clostridia	Clostridiales	Lachnospiraceae	Shuttleworthia	uncultured_bacterium
OTU963	18	7	3	37	34	41	56	36	11	16	1	2	25	64	178	33	Firmicutes	Clostridia	Clostridiales	Ruminococcaceae
OTU964	6	0	0	1	1	0	0	0	0	0	0	0	0	0	0	0	Actinobacteria	Actinobacteria	Coriobacteriales	Coriobacteriaceae	uncultured
OTU965	0	0	2	7	0	1	2	7	0	0	0	0	0	0	0	0	Firmicutes	Clostridia	Clostridiales	Ruminococcaceae
OTU966	1	0	0	14	8	36	24	1	0	0	0	2	0	0	0	0	Firmicutes	Clostridia	Clostridiales	Ruminococcaceae	uncultured
OTU967	1	0	0	17	14	9	12	25	0	0	1	1	0	30	0	4	Firmicutes	Clostridia	Clostridiales	Family_XIII	uncultured
OTU968	150	2	27	126	690	40	178	688	19	74	28	167	66	47	77	53	Proteobacteria	Deltaproteobacteria	Desulfovibrionales	Desulfovibrionaceae	Desulfovibrio
OTU970	0	8	0	0	0	0	0	0	0	0	0	0	0	0	0	0	Bacteroidetes	Bacteroidia	Bacteroidales	Prevotellaceae	Prevotella
OTU971	18	0	6	8	2	1	3	1	0	0	0	0	0	1	0	0	Firmicutes	Clostridia	Clostridiales	Ruminococcaceae	Incertae_Sedis
OTU972	0	0	0	0	0	0	0	0	0	0	0	0	0	1	0	2	Firmicutes	Clostridia	Clostridiales	Ruminococcaceae	Incertae_Sedis
OTU974	2	0	0	10	2	1	4	0	0	0	0	0	0	0	0	0	Actinobacteria	Actinobacteria	Coriobacteriales	Coriobacteriaceae	uncultured
OTU975	2	1	3	0	0	0	0	0	1	0	0	7	0	0	0	0	Proteobacteria	Gammaproteobacteria	Pseudomonadales	Moraxellaceae	Acinetobacter
OTU976	474	5	101	378	3547	40	455	539	1	0	0	1	0	0	0	0	Firmicutes	Negativicutes	Selenomonadales	Veillonellaceae	Megamonas	Megamonas_hypermegale
OTU977	0	0	0	0	0	0	0	0	0	0	1	2	0	0	0	0	Actinobacteria	Actinobacteria	Pseudonocardiales	Pseudonocardiaceae	Pseudonocardia
OTU978	4	0	0	7	2	0	11	0	0	0	0	4	0	0	1	2	Bacteroidetes	Bacteroidia	Bacteroidales	Rikenellaceae	Alistipes
OTU979	6	2	0	19	24	1	7	26	0	0	0	0	2	5	2	7	Firmicutes	Clostridia	Clostridiales	Lachnospiraceae	uncultured
OTU980	0	24	0	0	0	0	0	0	0	0	0	0	0	0	0	0	Firmicutes	Clostridia	Clostridiales	Ruminococcaceae	uncultured	unidentified_rumen_bacterium_RFN71
OTU981	0	126	0	0	0	0	0	0	0	0	0	0	0	0	0	0	Spirochaetae	Spirochaetes
OTU982	0	119	0	0	0	0	0	0	0	0	0	0	0	0	0	0	Firmicutes	Clostridia	Clostridiales	Lachnospiraceae	uncultured
OTU983	0	1	5	21	13	10	8	30	1	0	1	1	0	2	0	0	Firmicutes	Clostridia	Clostridiales	Lachnospiraceae
OTU986	0	0	0	0	0	0	0	0	0	2	0	0	0	0	0	0	Firmicutes	Negativicutes	Selenomonadales	Veillonellaceae	Veillonella
OTU987	3	0	1	30	9	38	22	2	1	1	0	0	0	31	0	0	Bacteroidetes	Bacteroidia	Bacteroidales	Rikenellaceae
OTU988	0	83	0	0	0	0	0	0	0	0	0	0	0	0	0	0	Firmicutes	Clostridia	Clostridiales	Ruminococcaceae	Ruminococcus
OTU990	0	0	0	0	0	0	0	0	0	0	0	0	0	69	0	0	Proteobacteria	Alphaproteobacteria	Rickettsiales	Rickettsiales_Incertae_Sedis	Candidatus_Captivus
OTU991	0	0	0	3	0	1	0	1	3	2	0	0	0	2	0	1	Firmicutes	Clostridia	Clostridiales	Ruminococcaceae	uncultured
OTU992	0	0	0	0	0	0	0	0	1	1	1	1	17	104	620	39	Bacteroidetes	Bacteroidia	Bacteroidales
OTU993	0	5	0	0	0	0	0	0	0	0	0	0	0	1	0	0	Cyanobacteria	Cyanobacteria	SubsectionI	FamilyI
OTU994	0	10	0	0	0	0	0	0	0	0	0	0	0	0	0	0	Bacteroidetes	Sphingobacteriia	Sphingobacteriales	Saprospiraceae	uncultured	uncultured_bacterium_MK04
OTU995	0	0	6	0	0	0	0	0	0	0	0	0	0	0	0	0	Firmicutes	Bacilli	Lactobacillales	Streptococcaceae	Streptococcus
OTU996	0	0	0	0	1	0	0	0	0	2	0	1	5	3	5	11	Firmicutes	Clostridia	Clostridiales	Lachnospiraceae
OTU997	0	0	0	7	0	18	36	0	0	0	0	0	0	19	0	0	Bacteroidetes	Bacteroidia	Bacteroidales	Rikenellaceae	RC9_gut_group	uncultured_bacterium
OTU998	4	1	3	16	38	18	7	13	2	0	1	0	2	20	1	16	Firmicutes	Clostridia	Clostridiales	Ruminococcaceae	Anaerofilum	uncultured_Firmicutes_bacterium
OTU999	33	1	13	67	45	75	34	5	37	1	14	3	0	65	81	6	Firmicutes	Clostridia	Clostridiales	Ruminococcaceae	Ruminococcus	bacterium_ic1277
OTU1000	0	0	0	0	0	0	0	0	1	4	0	0	8	7	2	1	Bacteroidetes	Bacteroidia	Bacteroidales	Porphyromonadaceae	Odoribacter	uncultured_bacterium
OTU1001	0	0	0	1	1	0	0	0	1	1	0	0	0	0	0	0	Firmicutes	Clostridia	Clostridiales	Lachnospiraceae	Incertae_Sedis	Fusicatenibacter_saccharivorans
OTU1002	0	24	0	0	0	0	0	0	0	0	0	0	0	0	0	0	Bacteroidetes	Bacteroidia	Bacteroidales	Rikenellaceae	Alistipes	uncultured_bacterium
OTU1003	6	0	2	9	13	3	5	1	1	1	0	0	5	0	0	2	Firmicutes	Clostridia	Clostridiales	Ruminococcaceae	Anaerotruncus
OTU1005	1	0	0	0	0	1	0	0	18	5	2	0	6	2	15	2	Firmicutes	Clostridia	Clostridiales	Ruminococcaceae	Butyricicoccus	uncultured_bacterium
OTU1006	0	0	0	9	2	5	3	10	0	0	0	0	0	0	0	0	Firmicutes	Clostridia	Clostridiales	Ruminococcaceae	uncultured	uncultured_rumen_bacterium_4C28d-12
OTU1008	2	0	0	2	1	0	0	3	0	0	0	0	0	0	0	1	Firmicutes	Clostridia	Clostridiales	Ruminococcaceae	Anaerotruncus	uncultured_bacterium
OTU1009	0	0	0	0	0	0	0	0	1	18	1	0	14	4	0	0	Proteobacteria	Betaproteobacteria	Burkholderiales	Alcaligenaceae	Sutterella	Sutterella_parvirubra
OTU1010	0	129	0	0	0	0	0	0	0	0	0	0	0	0	0	0	Bacteroidetes	Bacteroidia	Bacteroidales	Rikenellaceae	Alistipes
OTU1011	0	0	0	0	0	0	0	0	3	0	1	4	0	0	0	0	Firmicutes	Bacilli	Bacillales	Planococcaceae	uncultured
OTU1013	5	0	3	3	0	0	0	0	3	0	0	2	0	0	0	0	Firmicutes	Bacilli	Lactobacillales	Lactobacillaceae	Lactobacillus	Lactobacillus_sanfranciscensis_TMW_1.1304
OTU1014	11	0	2	12	4	34	27	0	2	19	0	1	62	4	95	4	Bacteroidetes	Bacteroidia	Bacteroidales	Porphyromonadaceae	Butyricimonas	uncultured_bacterium
OTU1016	0	0	0	0	0	0	0	0	2	29	0	0	38	0	6	0	Proteobacteria	Gammaproteobacteria
OTU1017	3	0	0	2	2	5	2	9	0	0	0	0	0	0	0	2	Firmicutes	Clostridia	Clostridiales	Defluviitaleaceae	uncultured	uncultured_bacterium
OTU1018	0	5	0	0	0	0	0	0	0	0	0	0	0	0	0	0	Proteobacteria	Alphaproteobacteria	Rhizobiales	MNG7	no rank	uncultured_bacterium
OTU1019	0	2	0	0	0	0	0	0	0	0	0	0	0	0	0	0	Proteobacteria	Epsilonproteobacteria	Campylobacterales	Helicobacteraceae	Helicobacter
OTU1020	2	1	0	0	0	0	0	0	0	0	1	7	0	1	0	0	Actinobacteria	Actinobacteria	Micrococcales	Micrococcaceae	Kocuria	Kocuria_rosea
OTU1021	3	1	1	0	0	8	0	0	0	3	0	0	0	0	0	0	Firmicutes	Clostridia	Clostridiales	Ruminococcaceae	uncultured
OTU1022	0	2	0	17	5	3	3	11	0	0	0	0	0	0	0	0	Firmicutes	Clostridia	Clostridiales	Ruminococcaceae	Incertae_Sedis
OTU1023	0	0	3	0	1	0	0	0	0	0	5	58	0	1	0	0	Actinobacteria	Actinobacteria	Corynebacteriales	Corynebacteriaceae	Corynebacterium
OTU1024	1	0	0	0	0	0	0	0	2	1	0	1	1	0	1	9	Proteobacteria	Betaproteobacteria	Rhodocyclales	Rhodocyclaceae	12up	uncultured_Rhodocyclaceae_bacterium
OTU1025	35	0	0	1	2	2	4	4	24	13	0	0	1	0	3	0	Bacteroidetes	Bacteroidia	Bacteroidales	Rikenellaceae	Rikenella
OTU1027	33	2	31	2	0	0	0	0	0	0	167	6	0	0	0	0	Firmicutes	Clostridia	Clostridiales	Clostridiaceae_1	Clostridium_sensu_stricto_1
OTU1028	1	8	4	1	0	1	1	0	0	0	0	0	0	0	0	0	Firmicutes	Clostridia	Clostridiales	Clostridiaceae_1	Clostridium_sensu_stricto_1	Clostridium_butyricum
OTU1029	0	85	2	0	3	0	0	0	1	0	1	4	0	0	0	0	Bacteroidetes	Bacteroidia	Bacteroidales	Bacteroidaceae	Bacteroides	Bacteroides_vulgatus_ATCC_8482
OTU1030	0	94	0	0	0	0	0	0	0	0	0	0	0	0	0	0	Bacteroidetes	Bacteroidia	Bacteroidales	S24-7	no rank	uncultured_bacterium
OTU1031	1	1	1	8	1	3	9	5	27	41	9	26	185	128	400	131	Firmicutes	Clostridia	Clostridiales	Ruminococcaceae	Faecalibacterium	bacterium_ic1379
OTU1032	0	7	0	0	0	0	0	0	0	0	0	0	0	0	0	0	Firmicutes	OPB54	no rank	no rank	no rank
OTU1033	51	1	13	101	43	107	70	46	53	28	6	41	99	306	266	389	Firmicutes	Clostridia	Clostridiales	Ruminococcaceae	Faecalibacterium
OTU1034	1	0	0	1	11	2	6	11	0	0	0	0	0	1	0	0	Firmicutes	Clostridia	Clostridiales	Ruminococcaceae	Incertae_Sedis
OTU1036	0	344	0	0	0	0	0	2	0	0	0	0	0	0	0	0	Proteobacteria	Gammaproteobacteria	Pseudomonadales	Pseudomonadaceae	Pseudomonas	Pseudomonas_resinovorans
OTU1037	0	7	0	0	0	0	0	0	0	0	0	0	0	0	0	0	Firmicutes	Clostridia	Clostridiales	Clostridiaceae_1	Oxobacter
Note:“Gf1~ Gf4, Gc1~ Gc4, Ff1~ Ff4 and Fc1~ Fc4” represents four individuals from grass-fed and high grain-fed geese, respectively.“Gf and Ff” indicates the faeces samples from grass-fed geese and high grain-fed geese, respectively, while “Gc and Fc” indicates the caecum from grass-fed geese and high grain-fed geese, respectively.
